# Supplementary material for: Adoption factors associated with electronic health record among long-term care facilities: a systematic review
Source: PubMed Central journal article supplement — BMJ Open. 2015 Jan 28;5(1):e006615. doi: 10.1136/bmjopen-2014-006615 (PMC4316426; doi:10.1136/bmjopen-2014-006615), 2015-01-28
Supplement: bmjopen-2014-006615.draft_revisions.pdf [file bmjopen-2014-006615.draft_revisions.pdf]

# BMJ Open

## Adoption Factors Associated with Electronic Health Record among Long-Term Care Facilities – A Systematic Review

|                                 |                                                                                                                                                                                                                                                                                                                                                                                                  |
|---------------------------------|--------------------------------------------------------------------------------------------------------------------------------------------------------------------------------------------------------------------------------------------------------------------------------------------------------------------------------------------------------------------------------------------------|
| Journal:                        | <i>BMJ Open</i>                                                                                                                                                                                                                                                                                                                                                                                  |
| Manuscript ID:                  | bmjopen-2014-006615                                                                                                                                                                                                                                                                                                                                                                              |
| Article Type:                   | Research                                                                                                                                                                                                                                                                                                                                                                                         |
| Date Submitted by the Author:   | 11-Sep-2014                                                                                                                                                                                                                                                                                                                                                                                      |
| Complete List of Authors:       | Kruse, Clemens; Texas State University, School of Health Administration<br>Mileski, Michael; Texas State University, School of Health Administration<br>Alaytsev, Vyachelslav; Texas State University, School of Health Administration<br>Carol, Elizabeth; Texas State University, School of Health Administration<br>Williams, Ariana; Texas State University, School of Health Administration |
| <b>Primary Subject Heading</b>: | Health services research                                                                                                                                                                                                                                                                                                                                                                         |
| Secondary Subject Heading:      | Geriatric medicine, Health informatics, Health policy                                                                                                                                                                                                                                                                                                                                            |
| Keywords:                       | Information management < BIOTECHNOLOGY & BIOINFORMATICS, HEALTH SERVICES ADMINISTRATION & MANAGEMENT, Health policy < HEALTH SERVICES ADMINISTRATION & MANAGEMENT                                                                                                                                                                                                                                |
|                                 |                                                                                                                                                                                                                                                                                                                                                                                                  |

SCHOLARONE™  
Manuscripts

## Adoption Factors Associated with Electronic Health Record among Long-Term Care Facilities – A Systematic Review

Clemens Scott Kruse,<sup>[i]</sup> Michael Mileski,<sup>[ii]</sup> Vyachelslav Alaytsev,<sup>[iii]</sup> Elizabeth Carol<sup>[iii]</sup>, Ariana Williams<sup>[iii]</sup>

- i. MBA, MSIT, MHA, PhD, FACHE, CPHIMS, Assistant Professor, Texas State University, San Marcos TX, 78666 U.S.A.
- ii. DC, MPH, MSHEd, LNFA, Assistant Professor, Texas State University, San Marcos, TX, 78666 U.S.A.
- iii. Graduate Student, Texas State University, San Marcos TX, 78666, U.S.A.

Corresponding Author:  
Clemens Scott Kruse  
College of Health Professions  
School of Health Administration  
Texas State University  
HPB, 2nd Floor  
601 University Drive  
San Marcos, TX, 78666 U.S.A.  
United States  
Phone: 1 210 355 4742  
Fax: 1 512 245 8712  
Email: [scottkruse@txstate.edu](mailto:scottkruse@txstate.edu)

Keywords: Long-term care (LTC), electronic health record (EHR), electronic medical record (EMR), diffusion of innovation, HITECH Act

2716 words

Running page headline: Factors Associated w EHR Adoption in LTC

## ABSTRACT

**Background:** The Health Information Technology for Economic and Clinical Health (HITECH) Act created incentives for adopting electronic health records (EHRs) for some healthcare organizations, but long-term care (LTC) facilities are excluded from those incentives. There are realizable benefits of EHR adoption in LTC facilities; however, there is limited research about this topic.

**Objectives:** The purpose of this systematic literature review is to identify EHR adoption facilitators and barriers for LTC facilities, to add to the body of research on the topic.

**Materials & Methods:** We conducted systematic searches of Cumulative Index of Nursing and Allied Health Literature (CINAHL) Complete via Ebsco B. Stephens Company (EBSCO Host), Google Scholar, and the PubMed to collect data about EHR adoption factors in LTC facilities. Search results were filtered by date range, English language, and academic journals (n = 22). Multiple members of the research team read each article to confirm applicability and study conclusions.

**Results:** Results identify 50 instances of 10 facilitators and 50 instances of 11 barriers associated with EHR adoption in LTC facilities. The facilitator error reduction was identified the most often (20%) by the most number of articles studied (45%). The barrier cost occurred the most often (20%) in the greatest number of barriers identified in the articles studied (45%).

**Discussion & Conclusions:** Common facilitators and barriers were consistent in the literature. These commonalities should help policy makers use the most effective levers in the LTC segment of healthcare, and they should enable leaders in LTC facilities to align strategic decisions with EHR adoption.

## STRENGTHS AND LIMITATIONS OF THIS STUDY

This systematic review has several strengths and limitations, as detailed below.

### Strengths

- Adds to a body of knowledge of EHR adoption
- Contributes toward EHR adoption in LTC
- Provides a systematic review, in accordance with PRISMA
- Queries three well known research databases
- Queries use key terms registered with MeSH
- Multiple reviewers determined inclusion and exclusion criteria

### Limitations

- Only five years were examined
- Selection bias will always exist in subjective decisions (inclusion criteria). Controls for selection bias were enacted: more than one author had to recommend that an article be included in the study. The identification of both enablers and barriers followed the same rule.

## INTRODUCTION, BACKGROUND & SIGNIFICANCE

### Incentives

The Health Information Technology for Economic and Clinical Health (HITECH) Act of the American Recovery and Reinvestment Act (ARRA) of 2009 created reimbursement incentives for U.S. healthcare organizations that are using EHRs in meaningful ways.[1] Long-term care facilities (as defined by the ARRA) are facility types excluded from the incentives including: skilled nursing homes, assisted living facilities, LTC hospitals, rehabilitation hospitals, and psychiatric hospitals. Unfortunately, there has been no clear communication regarding reasons why “ineligible providers” have been excluded from the incentives under the ARRA. This is despite a relatively large body of evidence showing that there is value in the use of EHR in long-term care settings where it not only improves resident care, but also increases communications between providers, consultants, hospital, and nursing home staff.[2] There is documentation that exists which alludes to Congress wanting to understand the extent to which ineligible providers work in settings which might receive EHR incentives under the ARRA.[3] However, it should be noted that eligible providers (physicians for instance) were able to assign their incentive funding to a facility of their choice (whether or not that facility was an eligible provider), but no evidence exists to the extent of this assignment in the literature or to whom.[3] This represents not only a potentially large amount of untraceable incentive funds under the ARRA, but also a source of statistical interference when “meaningful use” is assessed.

While facilities eligible for these incentives demonstrate EHR adoption rates of about 12%, ineligible facilities have adoption rates of only 2-4%.[4] Incentives and grants from the HITECH Act are clearly a major motivating factor for EHR adoption;[5] however, LTC facilities must bear the adoption costs on their own, which represents a significant barrier.[5-15]

### Identification and definition of key terms

The American College of Hospital Executives (ACHE) defines long-term care as “a continuum of medical and social services designed to support the needs of people living with chronic health problems that affect their ability to perform everyday activities.” Long-term care spans a continuum of “traditional medical services, social services, and housing.” Services in long-term care have a significantly different aim than those in traditional, acute-care settings. While acute-care services aim to restore the patient to health, long-term care “aims to prevent deterioration and promote social adjustment to stages of decline” and it is delivered through a wide range of care givers and environments both in a healthcare facility and at home.[16] A large majority (92%) of long-term care facilities are privately owned and operated. The aging of the population creates an ever-increasing shortage of LTC beds per 1000 people 65 and over. Estimates show this trend will continue until the year 2030 with the percentage of persons 65 or over ballooning to 19% of the population.[17]

The broad definition of LTC from the ACHE could cast a wider net than necessary, or effective, for the purposes of this research. The research question we posited would only be appropriate for health care organizations that would have a use for the EHR. An assisted-living facility would have little use for an EHR that manages a patient’s entire continuum of care, when the facility may only need to manage something as small as medication or diet. Those with the need for an EHR would be those that manage the chronic conditions like a nursing home, or Skilled Nursing Facility. The latter two entities are targeted, for the purposes of this study,

The taxonomy for the Electronic Health Record widely varies: digital medical record, computerized patient record, electronic medical record, digital medical record, etc. For the purposes of this study, the term EHR will be used exclusively to speak to the longitudinal and

1  
2  
3 interoperable capabilities of an electronic medical record. This practice is supported by the  
4  
5 World Health Organization (WHO).[18] The inherent advantages of the EHR can enable any  
6  
7 certified, credentialed provider to access any patient record from any health care organization,  
8  
9 but the provider will only have access to the information necessary for the immediate incident of  
10  
11 care. The EHR enables providers to see past history, allergies, and treatment regimens with trend  
12  
13 analysis.[19] Therefore, the key term of “electronic health record” is targeted for this study.  
14  
15 However, because the term “electronic medical record” is often used synonymously, it will be  
16  
17 included in the key search terms.  
18  
19  
20  
21

### 22 **EHR adoption among facilities**

23  
24 In 2009, the US Government passed the American Recover and Reinvestment Act  
25  
26 (ARRA), which included a significant section for healthcare intended to incentivize the adoption  
27  
28 of the EHR. This section was called: Health Information Technology for Economic and Clinical  
29  
30 Health (HITECH) Act.[1] The three phases of Meaningful Use consume IT strategies because of  
31  
32 the HITECH Act’s timeline for healthcare organizations to qualify for monetary incentives.  
33  
34 Unfortunately, long-term care facilities were not included in these incentives.  
35  
36  
37

38  
39 Long-term care facilities that have adopted EHRs experience improvements in quality of  
40  
41 care, documentation access, billing and reimbursement, and employee satisfaction and retention  
42  
43 rates.[5-15,20] Interoperable EHRs may be especially useful to LTC facilities during periods of  
44  
45 transitional care, when coordination and communication with other healthcare organizations is  
46  
47 critical to achieving the best health outcomes.[21] Electronic health records are becoming more  
48  
49 important for LTC facilities because increased demand for services from aging baby-boomers is  
50  
51 inevitable.[22] While eligible organizations have the benefit of incentives to mitigate some costs  
52  
53 in attaining these benefits, LTC facilities must bear the full cost. There is a dearth of research  
54  
55  
56  
57  
58  
59  
60

1  
2  
3 available to help decision-makers at LTC facilities make objective conclusions about adopting  
4  
5 EHRs, which is why this review is critical to future research.  
6  
7

## 8 **Objectives**

9

10 It is important to identify the factors that influence EHR adoption in LTC facilities that  
11 are not dependent on HITECH incentive payments. This study's focus is to identify the EHR  
12 adoption facilitators well as discern the multitude of barriers LTC facilities face. While it is clear  
13 that implementing an EHR system could bring many benefits to organizations, realizing those  
14 benefits in the beginning stages might not be possible for every LTC facility.  
15  
16  
17  
18  
19  
20  
21

22 The findings of this review will be useful to LTC facility administrators interested in  
23 adopting EHRs into their organization by helping them identify barriers to overcome and  
24 opportunities to lever. Policymakers may also find the identified factors useful when attempting  
25 to increase EHR adoption in the long-term care industry. Additionally, vendors can benefit from  
26 this article's information so they can focus the software-development process of EHRs on the  
27 more salient facilitators and barriers to adoption.  
28  
29  
30  
31  
32  
33  
34  
35  
36  
37  
38  
39  
40  
41  
42  
43  
44  
45  
46  
47  
48  
49  
50  
51  
52  
53  
54  
55  
56  
57  
58  
59  
60



## METHODS

### Data

Data for this review were gathered from three separate databases: Google Scholar, Cumulative Index of Nursing and Allied Health Literature (CINAHL) Complete via EBSCO Host, and PubMed (which queries MEDLINE). Search criteria focused on EHR adoption in long-term care. To avoid the bandwagon effect, the authors independently reviewed the articles identified during the search. Following independent reviews, authors compared and discussed the articles and reason for inclusion in or exclusion from the study. Articles were only included in the final study if selected by at least two reviewers. An affinity matrix was created to identify frequency of both facilitators and barriers in the literature.

### Sample

Research databases were queried using key terms from the Medical Subject Headings (MeSH) at the National Center for Biotechnology Information (NCBI). The MeSH database revealed multiple terms for the EHR, as predicted. The two most prevalent search terms for LTC, appropriate for this study, were “nursing home” and “skilled nursing facility.” Several exclusion criteria were implemented through filters. Searches were limited to peer-reviewed journal articles in U.S., published in the English language from 2009-2014 (n = 22). This process is illustrated by Figure 1.

Figure 1. An illustration of the literature review process

### Standard for review and summary measures

The 2009 version of the preferred reporting items for systematic reviews and meta-analyses (PRISMA) was used as the standard and template for the review process. The primary

1  
2  
3 summary measures for this review are the discrete frequency and statistical average of identified  
4  
5 operators (facilitators and barriers) over the total identified.  
6  
7

### 8 **Bias**

9  
10  
11 Screening large quantities of manuscripts can be exhausting, and numbness of senses  
12  
13 could easily introduce bias into this evaluation. To help control the possibility bias, the authors  
14  
15 agreed to set a slow, but methodical pace of reading. Additionally, at least two authors read each  
16  
17 article and listed recommendation for inclusion or exclusion. These recommendations were then  
18  
19 compared and discussed in a group setting. Only articles recommended by more than one author  
20  
21 were included in the final study. The multiple-selection criterion was the authors' attempt to  
22  
23 control selection bias.  
24  
25  
26  
27  
28  
29  
30  
31  
32  
33  
34  
35  
36  
37  
38  
39  
40  
41  
42  
43  
44  
45  
46  
47  
48  
49  
50  
51  
52  
53  
54  
55  
56  
57  
58  
59  
60

## RESULTS

### Table of findings

The findings were summarized and inserted into the facilitators and barriers table after the authors chose articles to create the literature review. All duplicate articles were accounted for and consolidated before the findings table was created. The authors then reanalyzed the articles and identified the individual factors affecting EHR adoption in LTC facilities after the articles reached information saturation. These factors were then compiled into a frequency table to aid in the analysis. Results are summarized in Table 1.

Table 1. Summarized facilitators and barriers identified in the literature

| # | Authors                   | Facilitators                                                                                                                                                                                                                                      | Barriers                                                                                                                                                                                                                |
|---|---------------------------|---------------------------------------------------------------------------------------------------------------------------------------------------------------------------------------------------------------------------------------------------|-------------------------------------------------------------------------------------------------------------------------------------------------------------------------------------------------------------------------|
| 4 | Wolf L, et al. (2012).    | <ul style="list-style-type: none"> <li>Emerging payment methods could encourage EHR adoption.</li> <li>“Quality Improvement Organizations” may increase adoption because they provide technical support that many LTC facilities need.</li> </ul> | <ul style="list-style-type: none"> <li>HITECH incentives only focus on acute care and primary physicians.</li> <li>Expanding the incentives to LTC facilities may be too costly.</li> </ul>                             |
| 5 | Wang T, et al. (2012).    | <ul style="list-style-type: none"> <li>Anticipating state and federal requirements.</li> <li>Good communication between vendors and LTC facilities.</li> <li>Education and training programs.</li> </ul>                                          | <ul style="list-style-type: none"> <li>Lack of initial investment resources.</li> <li>No technical infrastructure.</li> <li>Not enough time to implement the EHR.</li> <li>Lack of space for the new system.</li> </ul> |
| 6 | Resnick H, et al. (2009). | <ul style="list-style-type: none"> <li>Error reduction.</li> <li>Quality.</li> <li>Efficiency.</li> <li>Better health outcomes.</li> </ul>                                                                                                        | <ul style="list-style-type: none"> <li>Cost.</li> <li>Complex systems (implementation).</li> <li>No standards (external).</li> </ul>                                                                                    |
| 7 | Davidson J. (2009).       | <ul style="list-style-type: none"> <li>Comprehensive implementation planning.</li> <li>Governmental initiatives.</li> <li>Management and staff support.</li> <li>.</li> </ul>                                                                     | <ul style="list-style-type: none"> <li>Cost.</li> <li>Privacy issues.</li> <li>Incorrect vendor.</li> </ul>                                                                                                             |
| 8 | Hamid F, et al. (2013).   | <ul style="list-style-type: none"> <li>EHR satisfaction increases when the users understand the benefits.</li> <li>Supportive management.</li> <li>Training programs.</li> </ul>                                                                  | <ul style="list-style-type: none"> <li>Cost.</li> <li>Perceived lack of usefulness.</li> <li>Time consuming.</li> </ul>                                                                                                 |

| #  | Authors                      | Facilitators                                                                                                                                                                                                                         | Barriers                                                                                                                                                                                                                                                                                              |
|----|------------------------------|--------------------------------------------------------------------------------------------------------------------------------------------------------------------------------------------------------------------------------------|-------------------------------------------------------------------------------------------------------------------------------------------------------------------------------------------------------------------------------------------------------------------------------------------------------|
| 9  | Alexander G, et al. (2009).  | <ul style="list-style-type: none"> <li>• Improve clinical decision making.</li> <li>• Earlier intervention.</li> <li>• Time savings.</li> </ul>                                                                                      | <ul style="list-style-type: none"> <li>• IT sophistication negatively correlated with detection of detection of incontinence (implementation issue?)</li> </ul>                                                                                                                                       |
| 10 | Phillips K, et al. (2010).   | <ul style="list-style-type: none"> <li>• Government financial incentives.</li> <li>• Reduced errors and adverse drug events.</li> <li>• Including users in the design and implementation process.</li> </ul>                         | <ul style="list-style-type: none"> <li>• Adoption costs.</li> <li>• Efficiency outcomes were inconsistent.</li> <li>• Incongruent cost savings.</li> <li>• Lack of interoperability.</li> <li>• Fear of changing the facility culture.</li> </ul>                                                     |
| 11 | Wilkins M. (2009).           | <ul style="list-style-type: none"> <li>• Training and learning the system increases adoption.</li> <li>• Understanding the usefulness of the EHR technology.</li> </ul>                                                              | <ul style="list-style-type: none"> <li>• Facility size.</li> <li>• Lack of change agents or leaders in the facility.</li> <li>• Lack of interoperability.</li> <li>• Cost.</li> <li>• Resistance to change.</li> </ul>                                                                                |
| 12 | Filipova AA. (2013).         | <ul style="list-style-type: none"> <li>• Federal and state government incentives or policy initiatives could offset financial barriers.</li> <li>• Aligning organizational strategic plans could also encourage adoption.</li> </ul> | <ul style="list-style-type: none"> <li>• Financial barriers like no capital to implement an EHR and the cost of hardware and infrastructure.</li> <li>• Organizational barriers.</li> <li>• Legal and regulatory barriers.</li> <li>• Technological barriers.</li> <li>• Network barriers.</li> </ul> |
| 13 | Bezboruah KC, et al. (2014). | <ul style="list-style-type: none"> <li>• Institutional pressure like anticipated regulations and competition pressures increase EHR adoption.</li> </ul>                                                                             | <ul style="list-style-type: none"> <li>• Cost of the electronic system and projected upgrades.</li> <li>• Leaders perceiving staff's resistance to change.</li> <li>• Misunderstanding how EHRs could be useful or not having enough information to choose the right system.</li> </ul>               |
| 14 | Cherry B. (2011).            | <ul style="list-style-type: none"> <li>• Fast-growing elder populations mean quality of care in LTC facilities must be addressed with EHRs.</li> <li>• A strong implementation plan within</li> </ul>                                | <ul style="list-style-type: none"> <li>• Cost and a lack of capital resources.</li> <li>• Lack of industry standards.</li> <li>• Complicated</li> </ul>                                                                                                                                               |

| #  | Authors                       | Facilitators                                                                                                                                                                                                                                                                                                        | Barriers                                                                                                                                                                                                                                                                                                                                                        |
|----|-------------------------------|---------------------------------------------------------------------------------------------------------------------------------------------------------------------------------------------------------------------------------------------------------------------------------------------------------------------|-----------------------------------------------------------------------------------------------------------------------------------------------------------------------------------------------------------------------------------------------------------------------------------------------------------------------------------------------------------------|
|    |                               | <p>the facility that aligns with strategic plans.</p> <ul style="list-style-type: none"> <li>Initial and follow-up training programs.</li> <li>A perception shift about the benefits of EHR adoption.</li> </ul>                                                                                                    | <p>implementation processes.</p> <ul style="list-style-type: none"> <li>Lack of technical support.</li> <li>Not enough evidence to support EHR's proposed benefits.</li> </ul>                                                                                                                                                                                  |
| 15 | Grabenbauer L, et al. (2011). | <ul style="list-style-type: none"> <li>Improved communication.</li> <li>Patient data access and sharing.</li> </ul>                                                                                                                                                                                                 | <ul style="list-style-type: none"> <li>Cost.</li> <li>Reduced time with patients.</li> <li>Currently EHRs do not impact population health.</li> </ul>                                                                                                                                                                                                           |
| 20 | Cherry B, et al. (2011).      | <ul style="list-style-type: none"> <li>Rapid patient record retrieval.</li> <li>Better document consistency, quality, and accuracy.</li> <li>Improvements in employee satisfaction and retention.</li> <li>Better patient assessments, oversight, and order processing.</li> <li>Better time management.</li> </ul> | <ul style="list-style-type: none"> <li>Technology and maintenance problems like downtime or learning the new system.</li> <li>Residents thought providers were more focused on the computers than on them.</li> </ul>                                                                                                                                           |
| 23 | Tabar P. (2013).              | <ul style="list-style-type: none"> <li>Perceptions are changing in long-term care; EHRs are becoming a cost of doing business.</li> </ul>                                                                                                                                                                           | <ul style="list-style-type: none"> <li>Most EHRs were built for acute care and LTC facilities had trouble finding a system that met the organization's needs.</li> </ul>                                                                                                                                                                                        |
| 24 | <i>Vendor Group.</i> (2013).  | <ul style="list-style-type: none"> <li>Cost reductions.</li> <li>Improve patient outcomes.</li> <li>State programs could help fund a facility's EHR adoption.</li> </ul>                                                                                                                                            |                                                                                                                                                                                                                                                                                                                                                                 |
| 25 | Yu P, et al. (2013).          | <ul style="list-style-type: none"> <li>Continuous training.</li> <li>Open dialogue with vendors.</li> <li>Balancing EHR accuracy with patient care.</li> </ul>                                                                                                                                                      | <ul style="list-style-type: none"> <li>Staff resisted the new system because personal perceptions about their age, lack of documentation skills, or other reasons created limitations.</li> <li>Information management became too difficult and documents lacked consistency.</li> <li>Providers complained about spending less time with residents.</li> </ul> |
| 26 | Hamann DJ, et al. (2013).     | <ul style="list-style-type: none"> <li>Nonprofit facilities were 40% more likely to adopt EHRs.</li> </ul>                                                                                                                                                                                                          | <ul style="list-style-type: none"> <li>For-profit facilities lagged behind in EHR adoption</li> </ul>                                                                                                                                                                                                                                                           |

| #  | Authors                  | Facilitators                                                                                                                                                                                                                                                                               | Barriers                                                                                                                                                                                                                                                                       |
|----|--------------------------|--------------------------------------------------------------------------------------------------------------------------------------------------------------------------------------------------------------------------------------------------------------------------------------------|--------------------------------------------------------------------------------------------------------------------------------------------------------------------------------------------------------------------------------------------------------------------------------|
|    |                          | <ul style="list-style-type: none"> <li>Nonprofits have more regulations, so may need the benefits of EHRs.</li> </ul>                                                                                                                                                                      | <p>rates.</p> <ul style="list-style-type: none"> <li>Fewer regulations enable for-profit facilities to invest in cost-effective endeavors and avoid the expense of EHR implementation.</li> </ul>                                                                              |
| 27 | Vest JR, et al. (2013).  | <ul style="list-style-type: none"> <li>More EHR vendors.</li> <li>Trends show electronic record use is on the rise.</li> <li>Meaningful use makes EHRs more prevalent.</li> </ul>                                                                                                          | <ul style="list-style-type: none"> <li>Lagging widespread EHR adoption.</li> <li>Misaligned incentives.</li> </ul>                                                                                                                                                             |
| 28 | Weaver. (2009).          | <ul style="list-style-type: none"> <li>Error reduction (quality).</li> <li>Improved efficiency.</li> <li>Consumer (user) perceptions</li> <li>Improved health outcomes</li> </ul>                                                                                                          | <ul style="list-style-type: none"> <li>Difficulties transitioning from paper to EHR. (Implementation .)</li> <li>Training becomes paramount.</li> </ul>                                                                                                                        |
| 29 | Gruber N, et al. (2010). | <ul style="list-style-type: none"> <li>Strong implementation team.</li> <li>Communicate often and thoroughly.</li> <li>Set goals, tasks, and schedules for the implementation.</li> <li>Reduced errors.</li> <li>Improved documentation.</li> </ul>                                        | <ul style="list-style-type: none"> <li>Minor increases in operating expenses.</li> <li>Training.</li> </ul>                                                                                                                                                                    |
| 30 | Holup AA, et al. (2014). | <ul style="list-style-type: none"> <li>Rapidly aging populations stresses the need to create interoperable, coordinated EHRs for LTC facilities.</li> </ul>                                                                                                                                | <ul style="list-style-type: none"> <li>Long-term care EHRs are not as comprehensive as acute care EHRs.</li> </ul>                                                                                                                                                             |
| 31 | Holup AA, et al. (2013). | <ul style="list-style-type: none"> <li>Created better health outcomes.</li> <li>Reduced extra costs.</li> <li>Improved delivery and quality.</li> <li>An increasing elder population makes implementing EHRs a necessity.</li> <li>Nonprofits were more likely to utilize EHRs.</li> </ul> | <ul style="list-style-type: none"> <li>High initial investment means slower adoption in facilities that cannot afford the EHR system, which slows the rate of becoming better integrated with acute care.</li> <li>Facility characteristics determine EHR adoption.</li> </ul> |

An analysis of the articles in the systematic literature review revealed multiple facilitators and barriers to adopting an EHR in LTC. The facilitators to adoption included error reduction, clinical and administrative efficiency, cost savings, health outcomes, access and transfer to information, project planning, user perceptions, security, facility characteristics, and time

1  
2  
3 savings. The barriers to adoption included costs, users' negative perception, implementation  
4  
5 issues, external factors, lack of proper training, incompatible facility characteristics, cultural  
6  
7 change, ineffective project planning, security concerns, staff retention, and incompatible system  
8  
9 issues.  
10

### 11 12 13 **Facilitators**

14  
15  
16 The determined facilitators associated with EHR adoption were: access and transfer of  
17  
18 information, long-run cost savings, error reduction, clinical and administrative efficiency, project  
19  
20 planning, security, user perceptions, facility characteristics, health outcomes, time savings, and  
21  
22 staff retention. The facilitators also have narrowed subsections throughout the articles. The  
23  
24 benefits LTC facilities faced after adopting EHRs are connected to the facilitators. For example,  
25  
26 facilities realized an ability to get to patient records quickly and easily, which is related to access  
27  
28 and transfer of information.[7,8,15, 20] Cost savings looked at the long-run facility savings and  
29  
30 how an EHR is an investment with benefits that take time to realize.[23,24] Error reduction was  
31  
32 another benefit of using EHRs, expressed as fewer prescription errors, more patient medication  
33  
34 and allergy alerts, and more overall health safeguards.[8,9,20] Efficiency enabled rapid  
35  
36 information exchange through administrative channels, improved productivity and consistency,  
37  
38 and better communication between clinical and administrative departments.[9-11,15,20]  
39  
40  
41  
42  
43  
44

### 45 46 **Barriers**

47  
48 The barriers varied in topic specification. The broad categories determined from the  
49  
50 literature review were: cost savings, user perception, implementation issues, external factors,  
51  
52 training, facility characteristics, cultural change, project planning, security, staff retention, and  
53  
54  
55  
56  
57  
58  
59  
60

1  
2  
3 system issues. Each broader category has sub-issues that LTC facilities face during EHR  
4  
5 adoption.  
6  
7

8  
9 Of the sub-issues, cost barriers were a consistent concern because adopting and  
10 implementing an EHR requires a substantial initial investment. Other cost concerns stem from  
11 the lack of funding for LTC facilities, future upgrades, and maintenance that will be necessary to  
12 successfully use the EHR.[8,13]  
13  
14  
15  
16  
17

18  
19 User perception barriers included issues with professional and public acceptance of the  
20 new system as well as functionality problems.[8-10] Implementation barriers were lack of  
21 complete understanding from the staff, too little training during and after implementation, and  
22 lack of time for implementation and understanding.[5,6,14,20] The external factors that present  
23 implementation problems were employee recruitment, lack of industry standards, facility  
24 location, and impact on the population.[5,14,15]  
25  
26  
27  
28  
29  
30  
31  
32  
33

34 Table 2. Factors identified in the literature  
35  
36

| Factors                              | Occurrences by Article Reference Number | Total Occurrences |
|--------------------------------------|-----------------------------------------|-------------------|
| <b>Facilitators</b>                  |                                         |                   |
| Error Reduction                      | 6, 7, 8, 9, 10, 20, 28, 29              | 8                 |
| Clinical & Administrative Efficiency | 6, 9, 10, 11, 15, 20, 28                | 7                 |
| Health Outcomes                      | 6, 9, 10, 20, 24, 28, 31                | 7                 |
| Cost Savings                         | 7, 10, 13, 23, 24, 26, 27               | 6                 |
| Access and Transfer to Information   | 7, 8, 10, 15, 20                        | 5                 |
| Project Planning                     | 4, 8, 14, 29                            | 4                 |
| User Perceptions                     | 8, 13, 14, 20                           | 4                 |
| Security                             | 10, 13, 26                              | 3                 |
| Facility Characteristics             | 14, 30, 31                              | 3                 |
| Time Saving                          | 8, 9, 20                                | 3                 |
| <b>Barriers</b>                      |                                         |                   |



|                          |                                    |    |
|--------------------------|------------------------------------|----|
| Cost                     | 5, 6, 7, 8, 10, 11, 12, 13, 14, 15 | 10 |
| User Perceptions         | 5, 8, 10, 13, 14, 15, 20, 25       | 8  |
| Implementation Issues    | 5, 6, 8, 9, 10, 14, 15, 25         | 8  |
| External Factors         | 5, 6, 10, 11, 14, 15, 30           | 7  |
| Training                 | 14, 15, 20, 25, 28,29              | 6  |
| Facility Characteristics | 5, 14, 23, 31                      | 4  |
| Cultural Change          | 10, 25                             | 2  |
| Project Planning         | 10, 13                             | 2  |
| Security                 | 8, 25                              | 2  |
| Staff Retention          | 14                                 | 1  |
| System Issues            | 25                                 | 1  |

## DISCUSSION

Many factors are identified in association with adoption of EHR technology in LTC facilities. The review identified error reduction and clinical and administrative efficiency as the facilitators to EHR adoption in LTC, and cost as the barrier most often identified in the literature.

The literature suggests that quality measures would increase if EHRs were more prevalent in LTC facilities, but vendors' main focus is the acute care environment;[10,21] which make the current EHRs impractical for most LTC facilities.[10,11,23] The literature also suggests that the adoption rate could increase if there were standardization in the EHR market, which would make systems easier to use across diverse healthcare environments.[10]

Vendors would benefit from connecting with long-term care leaders to understand how EHRs fit long-term care strategic planning. A useful EHR helps LTC facilities improves quality, reduces errors, aids with billing and reimbursement, increases employee satisfaction, and may also increase employee retention.[6,8,13] Long-term care facilities need EHRs that are interoperable with other hospital systems so transfers and coordination of care become easier and have less errors. Vendors would benefit from understanding how LTC facilities use EHRs and how to make them more compatible for long-term care needs.

The cost of implementing the EHR was the most prevalent barrier. Many facilities may reject acquiring or installing an EHR because the initial cost is so high and maintaining and upgrading the EHR may also be too costly.[5-15,20] Lack of initial capital could inhibit the first step of considering adopting an EHR. There was a general theme that if LTC facilities had funding, they could become meaningful EHR users more quickly. While cost is a barrier, it is important to point out that many studies stressed the need for LTC facilities to be coordinated with acute care hospitals to run more efficiently and productively. Finding the money required to

1  
2  
3 execute an EHR is critical to LTC facilities gaining the information it needs to make improved  
4  
5 clinical decisions.  
6

7  
8 Cost was a running topic among many studies because the HITECH Act's meaningful  
9  
10 use incentives do not include LTC facilities. Long-term care facilities lack the ability to  
11  
12 participate the HITECH incentive program, yet there is a gap in research that explores different  
13  
14 funding alternatives for long-term care.  
15

16  
17 The literature agrees on the significance that user perceptions plays on EHR adoption in  
18  
19 LTC environments.[5,8,10,13-15,20,25] Perception can manifest as something that can hinder or  
20  
21 help EHR adoption at LTC facilities. Rejecting an EHR may be due to a lack of understanding  
22  
23 about the user benefits,[8] which might be connected to fear of change.[13] The perception that  
24  
25 an EHR system will simply not be useful could also be a result of marketing shortfalls on the part  
26  
27 of EHR vendors. Lack of usefulness may also result from not effectively implementing the  
28  
29 system and failing to achieve expected benefits. However, concerns that the system will be  
30  
31 difficult to use can be addressed by selecting a system with a focus on user interfaces.  
32  
33

34  
35 Furthermore, misunderstanding EHR benefits may lead to a perception that using this technology  
36  
37 will reduce the amount of time physicians and nurses spend with residents.[15,20,25] logically,  
38  
39 an emphasis on facilitators such as cost savings and security improvements should also help  
40  
41 assuage negative perceptions. [26,27] A surprising finding was that the negative impact  
42  
43 providers perceived was due to a lack of training.[6,14,15,28,29] Training should help people  
44  
45 who lack general computer skills, documentation skills, and people who may find the systems  
46  
47 difficult to navigate.[25]  
48  
49  
50

51  
52  
53 Administrators' perceptions about the changing regulatory and competitive long-term  
54  
55 care environment may present some EHR adoption opportunities. Reasons facilities chose to  
56  
57  
58  
59  
60

1  
2  
3 adopt an EHR include anticipation about increases in the regulatory environment and changes to  
4 reimbursement.[4,13,30] Some nursing home administrators feared increased regulations in the  
5 industry, and this prompted EHR adoption to prepare for a possible mandate.[13,31] Others  
6 chose to adopt EHRs due to emerging payment methods, such as bundled payments, which  
7 require better coordination of care with outside entities to receive higher reimbursements.[4] The  
8 competitive long-term care environment steered some organizations to adopt EHRs to emulate  
9 competitors' EHR success.[13] The competitive advantage of EHRs should be explained to  
10 decision-makers so they can confidently adopt the systems. Additionally, policymakers must  
11 offer incentives along with the increases in regulations and changes in reimbursement; unfunded  
12 mandates would degrade EHR perceptions in long-term care.  
13  
14  
15  
16  
17  
18  
19  
20  
21  
22  
23  
24  
25

26  
27 Adopting an EHR relies heavily on the execution of the implementation process. Many  
28 studies agreed on the need for a strategic plan that accounts for the size, governance, costs,  
29 facility needs, and regulatory requirements of the internal and external  
30 environments.[8,10,13,14]  
31  
32  
33  
34  
35

### 36 **Limitations**

37  
38 This review summarizes current and comprehensive data about EHR adoption facilitators  
39 and barriers for LTC facilities. The lack of evidence written about EHR adoption among LTC  
40 facilities and the search database limits led to the exhaustive nature of adoption factors of the  
41 study. This study limited only the range of time in the collection of data. A set of criteria of  
42 quality of each article was not developed or enforced because we used data from research and  
43 opinion. Combining these two types of manuscripts was necessary to collect a depth of  
44 qualitative information concerning a topic that is not broadly researched. The authors' intent was  
45  
46  
47  
48  
49  
50  
51  
52  
53  
54  
55  
56  
57  
58  
59  
60

1  
2  
3 to create a comparison of LTC facilities for LTC facilities that want to implement an EHR in  
4  
5 today's environment.  
6  
7

## 8 **Conclusions**

9  
10 It is important to study factors affecting EHR adoption in LTC facilities because those  
11 facilities do not receive HITECH incentives. This study identified numerous facilitating factors  
12 and barriers through a systematic review of current articles in three scholarly databases. This  
13 information can be useful for decision-makers attempting successful EHR adoption in their LTC  
14 facility, policymakers trying to increase adoption rates without expanding incentives, and  
15 vendors who wish to create EHRs that coordinate with the needs of long-term care.  
16  
17  
18  
19  
20  
21  
22  
23  
24  
25  
26  
27  
28  
29  
30  
31  
32  
33  
34  
35  
36  
37  
38  
39  
40  
41  
42  
43  
44  
45  
46  
47  
48  
49  
50  
51  
52  
53  
54  
55  
56  
57  
58  
59  
60

**FUNDING**

This research received no specific grant from any funding agency in the public, commercial or not-for-profit sectors'

There are no conflicts of interest identified between the authors, results, or publication.

There were neither humans nor animals used as subjects of this research. In accordance with 45CFR46, this research qualifies as IRB Exempt.

For peer review only

## ACKNOWLEDGEMENTS & STATEMENT OF CONTRIBUTION

Authors provided equal contribution to the final product. The topic originated as directed research for a class for a Masters in Health Administration. The research was intended as both instructional on the topic and on writing for journals for publication. Dr.s Kruse and Mileski provided guidance, advice, and independent analysis to validate that of the graduate students.

For peer review only

## REFERENCES

1. Health Information Technology for Economic and Clinical Health Act, 42 U.S.C. § 201 2009.  
URL:  
[http://www.healthit.gov/sites/default/files/hitech\\_act\\_excerpt\\_from\\_arra\\_with\\_index.pdf](http://www.healthit.gov/sites/default/files/hitech_act_excerpt_from_arra_with_index.pdf)  
[accessed 3/18/2014] WebCite URL: <http://www.webcitation.org/6OApfh2QK>
2. Brandeis GH, Hogan M, Murphy M, et al. (2007). Electronic health record implementation in community nursing homes. *J Am Med Dir Assoc*, 2007;8(1): 31-34.
3. Assistant Secretary for Planning and Evaluation. EHR Payment Incentives for Providers Ineligible for Payment Incentives and Other Funding Study. URL:  
<http://aspe.hhs.gov/daltcp/reports/2013/EHRPIap.shtml#appendD> [Accessed 9/9/2014]
4. Wolf L, Harvell J, Jha AK. Hospitals Ineligible For Federal Meaningful-Use Incentives Have Dismally Low Rates Of Adoption Of Electronic Health Records. *Health Aff (Millwood)*, 2012;31(3), 505–513. doi:10.1377/hlthaff.2011.0351 PMID: 22392661
5. Wang T, Biedermann S. Adoption and Utilization of Electronic Health Record Systems by Long-Term Care Facilities in Texas. *Perspect Health Inf Manag*, 2012;1–14. PMID: 22737099
6. Resnick HE, Manard B, Stone R, et al. Use of electronic information systems in nursing homes: United States, 2004. *J Am Med Inform Assoc, JAMIA*, 2009;16(2): 179-186.
7. Davidson J. Electronic medical records: what they are and how they will revolutionize the delivery of resident care... first of a two-part series. *Canadian Nursing Home [serial online]*. 2009;20(3):15-16. Available from: CINAHL Complete, Ipswich, MA. Accessed July 9, 2014. ISSN: 0847-5520



- 1  
2  
3 8. Hamid F, Cline T. Providers' Acceptance Factors and their Perceived Barriers to Electronic  
4 Health Record (EHR) Adoption. *Online J Nurs Inform (OJNI)* 2013;17(3).  
5  
6  
7
- 8 9. Alexander GL, Madsen R. IT sophistication and quality measures in nursing homes. *J*  
9  
10 *Gerontol Nurs* 2009;35(7): 22.  
11
- 12 10. Phillips K, Wheeler C, Campbell J, et al. Electronic medical records in long-term care. *J*  
13 *Hosp Mark Public Relations*, 2010;20(2):131–142. doi:10.1080/15390942.2010.493377  
14  
15  
16  
17  
18  
19  
20  
21  
22  
23  
24  
25  
26  
27  
28  
29  
30  
31  
32  
33  
34  
35  
36  
37  
38  
39  
40  
41  
42  
43  
44  
45  
46  
47  
48  
49  
50  
51  
52  
53  
54  
55  
56  
57  
58  
59  
60
11. Wilkins M. Factors influencing acceptance of electronic health records in hospitals. *Perspect*  
21 *Health Inf Manag*, 2009;6, 18p. PMID: 20169018  
22  
23
12. Filipova AA. Electronic Health Records Use and Barriers and Benefits to Use in Skilled  
24  
25  
26  
27  
28  
29  
30  
31  
32  
33  
34  
35  
36  
37  
38  
39  
40  
41  
42  
43  
44  
45  
46  
47  
48  
49  
50  
51  
52  
53  
54  
55  
56  
57  
58  
59  
60
13. Bezboruah KC, Hamann, DJ, Smith JD. Management attitudes and technology adoption in  
32  
33  
34  
35  
36  
37  
38  
39  
40  
41  
42  
43  
44  
45  
46  
47  
48  
49  
50  
51  
52  
53  
54  
55  
56  
57  
58  
59  
60
14. Cherry B. Assessing Organizational Readiness for Electronic Health Record Adoption in  
37  
38  
39  
40  
41  
42  
43  
44  
45  
46  
47  
48  
49  
50  
51  
52  
53  
54  
55  
56  
57  
58  
59  
60
15. Grabenbauer L, Skinner A, Windle J. Electronic Health Record Adoption - Maybe It's not  
44  
45  
46  
47  
48  
49  
50  
51  
52  
53  
54  
55  
56  
57  
58  
59  
60
16. McCall N. Long-term care: Definition, demand, cost, and financing. URL:  
51  
52  
53  
54  
55  
56  
57  
58  
59  
60

- 1  
2  
3  
4  
5  
6  
7  
8  
9  
10  
11  
12  
13  
14  
15  
16  
17  
18  
19  
20  
21  
22  
23  
24  
25  
26  
27  
28  
29  
30  
31  
32  
33  
34  
35  
36  
37  
38  
39  
40  
41  
42  
43  
44  
45  
46  
47  
48  
49  
50  
51  
52  
53  
54  
55  
56  
57  
58  
59  
60
17. Association on aging. URL: [http://www.aoa.gov/Aging\\_Statistics/](http://www.aoa.gov/Aging_Statistics/) [accessed 9/4/2014]  
Webcitation: <http://www.webcitation.org/6SL0f14rt>
  18. Institute of Medicine, Key capabilities of an electronic health record, Institute of Medicine  
2003 Jul. URL <http://www.iom.edu/Reports/2003/Key-Capabilities-of-an-Electronic-Health-Record-System.aspx> [accessed 9/4/2014] WebCite URL:  
<http://www.webcitation.org/6ODtL6HKG>
  19. U.S. Health and Human Services. Learn EHR Basics. URL:  
<http://www.healthit.gov/providers-professionals/learn-ehr-basics> [accessed 9/4/2014]  
Webcitation: <http://www.webcitation.org/6SL21pUQO>
  20. Cherry B, Ford E, Peterson L. Experiences with electronic health records: Early adopters in  
long-term care facilities. *Health Care Manage Rev* 2011;36(3):265–274.  
doi:10.1097/HMR.0b013e31820e110f PMID: 21646885
  21. Tripp JS, Narus SP, Magill MK, et al. Evaluating the accuracy of existing EMR data as  
predictors of follow-up providers. *J Am Med Inform Assoc, JAMIA*, 2008;15(6):787-790.  
DOI: 10.1197/jamia.M2753 PMID: 18755996
  22. Robison J, Shugrue N, Fortinsky RH, et al. (2013). Long-Term Supports and Services  
Planning for the Future: Implications From a Statewide Survey of Baby Boomers and Older  
Adults. *Gerontologist*, gnt094. doi: 10.1093/geront/gnt094 PMID: 23990621
  23. Tabar P. Why EHRs matter to LTC's future. *Long-Term Living: For the Continuing Care  
Professional*, 2013;62(1):14–16.
  24. Vendor Group Develops EHR Code of Conduct. *J AHIMA*, 2013;84(8): 12–13.

- 1  
2  
3  
4  
5  
6  
7  
8  
9  
10  
11  
12  
13  
14  
15  
16  
17  
18  
19  
20  
21  
22  
23  
24  
25  
26  
27  
28  
29  
30  
31  
32  
33  
34  
35  
36  
37  
38  
39  
40  
41  
42  
43  
44  
45  
46  
47  
48  
49  
50  
51  
52  
53  
54  
55  
56  
57  
58  
59  
60
25. Yu P, Zhang Y, Gong Y, et al. Unintended adverse consequences of introducing electronic health records in residential aged care homes. *Int J Med Inform*, 2013;82(9):772–788. doi:10.1016/j.ijmedinf.2013.05.008 PMID: 23770027
26. Hamann DJ, Bezboruah KC. Utilization of Technology by Long-Term Care Providers Comparisons Between For-Profit and Nonprofit Institutions. *J Aging Health*, 2013;25(4):535–554. doi:10.1177/0898264313480238 PMID: 23509114
27. Vest JR, Yoon J, Bossak BH. Changes to the electronic health records market in light of health information technology certification and meaningful use. *J Am Med Inform Assoc: JAMIA*, 2013;20(2):227–232. doi:10.1136/amiajnl-2011-000769 PMID: 22917839
28. Weaver S, Dick M, Dougherty M, et al. EHR adoption in LTC and the HIM value. *J of AHIMA/ Am Health Inform Assoc*, 2009;82(1):46-51. PMID: 21306009
29. Gruber N, Darragh J, Puccia P, et al. Embracing change to improve performance: implementation of an electronic health record system. *Long-Term Living: For the Continuing Care Professional*, 2010;59(1), 28–31.
30. Holup AA, Dobbs D, Temple A, et al. Going Digital Adoption of Electronic Health Records in Assisted Living Facilities. *J Appl Gerontol*, 2014;33(4):494–504. doi:10.1177/0733464812454009 PMID: 24781968
31. Holup AA, Dobbs D, Meng H, et al. Facility characteristics associated with the use of electronic health records in residential care facilities. *J Am Med Inform Assoc*, 2013;20(4):787–791. doi:10.1136/amiajnl-2012-001564 PMID: 23645538
32. Ford EW, Menachemi N, Peterson LT, et al. Resistance Is Futile: But It Is Slowing the Pace of EHR Adoption Nonetheless. *J Am Med Inform Assoc, JAMIA*, 2009;16(3):274–281. doi:10.1197/jamia.M3042 PMID: 19261931

1  
2  
3  
4  
5  
6  
7  
8  
9  
10  
11  
12  
13  
14  
15  
16  
17  
18  
19  
20  
21  
22  
23  
24  
25  
26  
27  
28  
29  
30  
31  
32  
33  
34  
35  
36  
37  
38  
39  
40  
41  
42  
43  
44  
45  
46  
47  
48  
49  
50  
51  
52  
53  
54  
55  
56  
57  
58  
59  
60

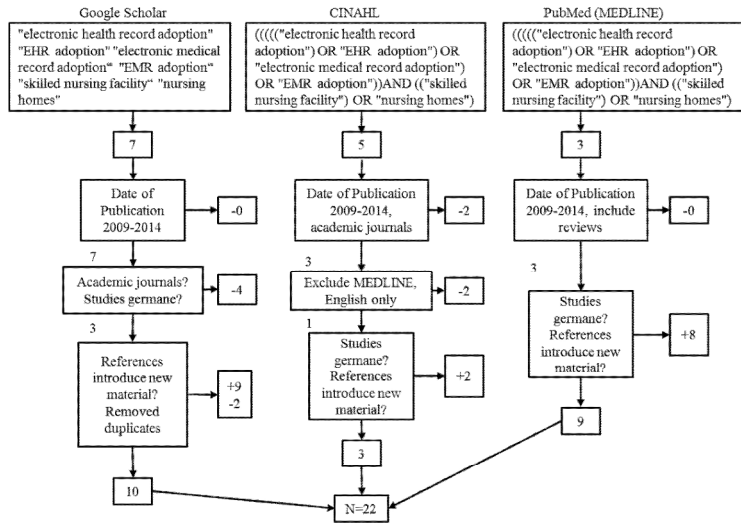

Literature review process from three research databases  
279x215mm (300 x 300 DPI)

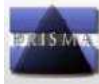

# PRISMA 2009 Checklist

| Section/topic                      | #  | Checklist item                                                                                                                                                                                                                                                                                              | Reported on page # |
|------------------------------------|----|-------------------------------------------------------------------------------------------------------------------------------------------------------------------------------------------------------------------------------------------------------------------------------------------------------------|--------------------|
| <b>TITLE</b>                       |    |                                                                                                                                                                                                                                                                                                             |                    |
| Title                              | 1  | Identify the report as a systematic review, meta-analysis, or both.                                                                                                                                                                                                                                         | 1                  |
| <b>ABSTRACT</b>                    |    |                                                                                                                                                                                                                                                                                                             |                    |
| Structured summary                 | 2  | Provide a structured summary including, as applicable: background; objectives; data sources; study eligibility criteria, participants, and interventions; study appraisal and synthesis methods; results; limitations; conclusions and implications of key findings; systematic review registration number. | 2                  |
| <b>INTRODUCTION</b>                |    |                                                                                                                                                                                                                                                                                                             |                    |
| Rationale                          | 3  | Describe the rationale for the review in the context of what is already known.                                                                                                                                                                                                                              | 4-7                |
| Objectives                         | 4  | Provide an explicit statement of questions being addressed with reference to participants, interventions, comparisons, outcomes, and study design (PICOS).                                                                                                                                                  | 7                  |
| <b>METHODS</b>                     |    |                                                                                                                                                                                                                                                                                                             |                    |
| Protocol and registration          | 5  | Indicate if a review protocol exists, if and where it can be accessed (e.g., Web address), and, if available, provide registration information including registration number.                                                                                                                               | NA                 |
| Eligibility criteria               | 6  | Specify study characteristics (e.g., PICOS, length of follow-up) and report characteristics (e.g., years considered, language, publication status) used as criteria for eligibility, giving rationale.                                                                                                      | NA                 |
| Information sources                | 7  | Describe all information sources (e.g., databases with dates of coverage, contact with study authors to identify additional studies) in the search and date last searched.                                                                                                                                  | 8                  |
| Search                             | 8  | Present full electronic search strategy for at least one database, including any limits used, such that it could be repeated.                                                                                                                                                                               | Figure 1           |
| Study selection                    | 9  | State the process for selecting studies (i.e., screening, eligibility, included in systematic review, and, if applicable, included in the meta-analysis).                                                                                                                                                   | 8                  |
| Data collection process            | 10 | Describe method of data extraction from reports (e.g., piloted forms, independently, in duplicate) and any processes for obtaining and confirming data from investigators.                                                                                                                                  | 8                  |
| Data items                         | 11 | List and define all variables for which data were sought (e.g., PICOS, funding sources) and any assumptions and simplifications made.                                                                                                                                                                       | 5                  |
| Risk of bias in individual studies | 12 | Describe methods used for assessing risk of bias of individual studies (including specification of whether this was done at the study or outcome level), and how this information is to be used in any data synthesis.                                                                                      | 9                  |
| Summary measures                   | 13 | State the principal summary measures (e.g., risk ratio, difference in means).                                                                                                                                                                                                                               | 9                  |
| Synthesis of results               | 14 | Describe the methods of handling data and combining results of studies, if done, including measures of consistency (e.g., $I^2$ for each meta-analysis).                                                                                                                                                    | 10                 |

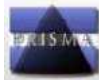

# PRISMA 2009 Checklist

Page 1 of 2

| Section/topic                 | #  | Checklist item                                                                                                                                                                                           | Reported on page # |
|-------------------------------|----|----------------------------------------------------------------------------------------------------------------------------------------------------------------------------------------------------------|--------------------|
| Risk of bias across studies   | 15 | Specify any assessment of risk of bias that may affect the cumulative evidence (e.g., publication bias, selective reporting within studies).                                                             | NA                 |
| Additional analyses           | 16 | Describe methods of additional analyses (e.g., sensitivity or subgroup analyses, meta-regression), if done, indicating which were pre-specified.                                                         | NA                 |
| <b>RESULTS</b>                |    |                                                                                                                                                                                                          |                    |
| Study selection               | 17 | Give numbers of studies screened, assessed for eligibility, and included in the review, with reasons for exclusions at each stage, ideally with a flow diagram.                                          | 10                 |
| Study characteristics         | 18 | For each study, present characteristics for which data were extracted (e.g., study size, PICOS, follow-up period) and provide the citations.                                                             | 10-13              |
| Risk of bias within studies   | 19 | Present data on risk of bias of each study and, if available, any outcome level assessment (see item 12).                                                                                                | NA                 |
| Results of individual studies | 20 | For all outcomes considered (benefits or harms), present, for each study: (a) simple summary data for each intervention group (b) effect estimates and confidence intervals, ideally with a forest plot. | Table 1            |
| Synthesis of results          | 21 | Present results of each meta-analysis done, including confidence intervals and measures of consistency.                                                                                                  | NA                 |
| Risk of bias across studies   | 22 | Present results of any assessment of risk of bias across studies (see Item 15).                                                                                                                          | NA                 |
| Additional analysis           | 23 | Give results of additional analyses, if done (e.g., sensitivity or subgroup analyses, meta-regression [see Item 16]).                                                                                    | NA                 |
| <b>DISCUSSION</b>             |    |                                                                                                                                                                                                          |                    |
| Summary of evidence           | 24 | Summarize the main findings including the strength of evidence for each main outcome; consider their relevance to key groups (e.g., healthcare providers, users, and policy makers).                     | 17                 |
| Limitations                   | 25 | Discuss limitations at study and outcome level (e.g., risk of bias), and at review-level (e.g., incomplete retrieval of identified research, reporting bias).                                            | 3,19               |
| Conclusions                   | 26 | Provide a general interpretation of the results in the context of other evidence, and implications for future research.                                                                                  | 20                 |
| <b>FUNDING</b>                |    |                                                                                                                                                                                                          |                    |
| Funding                       | 27 | Describe sources of funding for the systematic review and other support (e.g., supply of data); role of funders for the systematic review.                                                               | 21                 |

From: Moher D, Liberati A, Tetzlaff J, Altman DG, The PRISMA Group (2009). Preferred Reporting Items for Systematic Reviews and Meta-Analyses: The PRISMA Statement. PLoS Med 6(6): e1000097. doi:10.1371/journal.pmed1000097

For more information, visit: [www.prisma-statement.org](http://www.prisma-statement.org).

Page 2 of 2

For peer review only - <http://bmjopen.bmj.com/site/about/guidelines.xhtml>

## Adoption Factors Associated with Electronic Health Record among Long-Term Care Facilities – A Systematic Review

Clemens Scott Kruse,[i] Michael Mileski,[ii] Vyachelslav Alaytsev,[iii] Elizabeth Carol[iii], Ariana Williams[iii]

- i. MBA, MSIT, MHA, PhD, FACHE, CPHIMS, Assistant Professor, Texas State University, San Marcos TX, 78666 U.S.A.
- ii. DC, MPH, MSHEd, LNFA, Assistant Professor, Texas State University, San Marcos, TX, 78666 U.S.A.
- iii. Graduate Student, Texas State University, San Marcos TX, 78666, U.S.A.

Corresponding Author:  
Clemens Scott Kruse  
College of Health Professions  
School of Health Administration  
Texas State University  
HPB, 2nd Floor  
601 University Drive  
San Marcos, TX, 78666 U.S.A.  
United States  
Phone: 1 210 355 4742  
Fax: 1 512 245 8712  
Email: [scottkruse@txstate.edu](mailto:scottkruse@txstate.edu)

Keywords: Long-term care (LTC), electronic health record (EHR), electronic medical record (EMR), diffusion of innovation, HITECH Act

2716 words

Running page headline: Factors Associated w EHR Adoption in LTC

## ABSTRACT

**Background:** The Health Information Technology for Economic and Clinical Health (HITECH) Act created incentives for adopting electronic health records (EHRs) for some healthcare organizations, but long-term care (LTC) facilities are excluded from those incentives. There are realizable benefits of EHR adoption in LTC facilities; however, there is limited research about this topic.

**Objectives:** The purpose of this systematic literature review is to identify EHR adoption facilitators and barriers for LTC facilities, to add to the body of research on the topic.

**Materials & Methods:** We conducted systematic searches of Cumulative Index of Nursing and Allied Health Literature (CINAHL) Complete via Ebsco B. Stephens Company (EBSCO Host), Google Scholar, and the PubMed to collect data about EHR adoption factors in LTC facilities. Search results were filtered by date range, English language, and academic journals (n = 22). Multiple members of the research team read each article to confirm applicability and study conclusions.

**Results:** Results identify 50 instances of 10 facilitators and 50 instances of 11 barriers associated with EHR adoption in LTC facilities. The facilitator error reduction was identified the most often (20%) by the most number of articles studied (45%). The barrier cost occurred the most often (20%) in the greatest number of barriers identified in the articles studied (45%).

**Discussion & Conclusions:** Common facilitators and barriers were consistent in the literature. These commonalities should help policy makers use the most effective levers in the LTC segment of healthcare, and they should enable leaders in LTC facilities to align strategic decisions with EHR adoption.



## STRENGTHS AND LIMITATIONS OF THIS STUDY

This systematic review has several strengths and limitations, as detailed below.

### Strengths

- Adds to a body of knowledge of EHR adoption
- Contributes toward EHR adoption in LTC
- Provides a systematic review, in accordance with PRISMA
- Queries three well known research databases
- Queries use key terms registered with MeSH
- Multiple reviewers determined inclusion and exclusion criteria

### Limitations

- Only five years were examined
- Selection bias will always exist in subjective decisions (inclusion criteria)

## INTRODUCTION, BACKGROUND & SIGNIFICANCE

### Incentives

The Health Information Technology for Economic and Clinical Health (HITECH) Act of the American Recovery and Reinvestment Act (ARRA) of 2009 created reimbursement incentives for U.S. healthcare organizations that are using EHRs in meaningful ways.[1] Long-term care facilities (as defined by the ARRA) are facility types excluded from the incentives including: skilled nursing homes, assisted living facilities, LTC hospitals, rehabilitation hospitals, and psychiatric hospitals. Unfortunately, there has been no clear communication regarding reasons why “ineligible providers” have been excluded from the incentives under the ARRA. This is despite a relatively large body of evidence showing that there is value in the use of EHR in long-term care settings where it not only improves resident care, but also increases communications between providers, consultants, hospital, and nursing home staff.[2] There is documentation that exists which alludes to Congress wanting to understand the extent to which ineligible providers work in settings which might receive EHR incentives under the ARRA.[3] However, it should be noted that eligible providers (physicians for instance) were able to assign their incentive funding to a facility of their choice (whether or not that facility was an eligible provider), but no evidence exists to the extent of this assignment in the literature or to whom.[3] This represents not only a potentially large amount of untraceable incentive funds under the ARRA, but also a source of statistical interference when “meaningful use” is assessed.

While facilities eligible for these incentives demonstrate EHR adoption rates of about 12%, ineligible facilities have adoption rates of only 2-4%.[4] Incentives and grants from the HITECH Act are clearly a major motivating factor for EHR adoption;[5] however, LTC facilities must bear the adoption costs on their own, which represents a significant barrier.[5-15]

## Identification and definition of key terms

The American College of Hospital Executives (ACHE) defines long-term care as “a continuum of medical and social services designed to support the needs of people living with chronic health problems that affect their ability to perform everyday activities.” Long-term care spans a continuum of “traditional medical services, social services, and housing.” Services in long-term care have a significantly different aim than those in traditional, acute-care settings. While acute-care services aim to restore the patient to health, long-term care “aims to prevent deterioration and promote social adjustment to stages of decline” and it is delivered through a wide range of care givers and environments both in a healthcare facility and at home.[16] A large majority (92%) of long-term care facilities are privately owned and operated. The aging of the population creates an ever-increasing shortage of LTC beds per 1000 people 65 and over. Estimates show this trend will continue until the year 2030 with the percentage of persons 65 or over ballooning to 19% of the population.[17]

The broad definition of LTC from the ACHE could cast a wider net than necessary, or effective, for the purposes of this research. The research question we posited would only be appropriate for health care organizations that would have a use for the EHR. An assisted-living facility would have little use for an EHR that manages a patient’s entire continuum of care, when the facility may only need to manage something as small as medication or diet. Those with the need for an EHR would be those that manage the chronic conditions like a nursing home, or Skilled Nursing Facility. The latter two entities are targeted, for the purposes of this study,

The taxonomy for the Electronic Health Record widely varies: digital medical record, computerized patient record, electronic medical record, digital medical record, etc. For the purposes of this study, the term EHR will be used exclusively to speak to the longitudinal and

1  
2  
3 interoperable capabilities of an electronic medical record. This practice is supported by the  
4  
5 World Health Organization (WHO).[18] The inherent advantages of the EHR can enable any  
6  
7 certified, credentialed provider to access any patient record from any health care organization,  
8  
9 but the provider will only have access to the information necessary for the immediate incident of  
10  
11 care. The EHR enables providers to see past history, allergies, and treatment regimens with trend  
12  
13 analysis.[19] Therefore, the key term of “electronic health record” is targeted for this study.  
14  
15 However, because the term “electronic medical record” is often used synonymously, it will be  
16  
17 included in the key search terms.  
18  
19  
20  
21

### 22 **EHR adoption among facilities**

23  
24 In 2009, the US Government passed the American Recover and Reinvestment Act  
25  
26 (ARRA), which included a significant section for healthcare intended to incentivize the adoption  
27  
28 of the EHR. This section was called: Health Information Technology for Economic and Clinical  
29  
30 Health (HITECH) Act.[1] The three phases of Meaningful Use consume IT strategies because of  
31  
32 the HITECH Act’s timeline for healthcare organizations to qualify for monetary incentives.  
33  
34 Unfortunately, long-term care facilities were not included in these incentives.  
35  
36  
37

38  
39 Long-term care facilities that have adopted EHRs experience improvements in quality of  
40  
41 care, documentation access, billing and reimbursement, and employee satisfaction and retention  
42  
43 rates.[5-15,20] Interoperable EHRs may be especially useful to LTC facilities during periods of  
44  
45 transitional care, when coordination and communication with other healthcare organizations is  
46  
47 critical to achieving the best health outcomes.[21] Electronic health records are becoming more  
48  
49 important for LTC facilities because increased demand for services from aging baby-boomers is  
50  
51 inevitable.[22] While eligible organizations have the benefit of incentives to mitigate some costs  
52  
53 in attaining these benefits, LTC facilities must bear the full cost. There is a dearth of research  
54  
55  
56  
57  
58  
59  
60

1  
2  
3 available to help decision-makers at LTC facilities make objective conclusions about adopting  
4  
5 EHRs, which is why this review is critical to future research.  
6  
7

## 8 **Objectives**

9

10 It is important to identify the factors that influence EHR adoption in LTC facilities that  
11 are not dependent on HITECH incentive payments. This study's focus is to identify the EHR  
12 adoption facilitators well as discern the multitude of barriers LTC facilities face. While it is clear  
13 that implementing an EHR system could bring many benefits to organizations, realizing those  
14 benefits in the beginning stages might not be possible for every LTC facility.  
15  
16  
17  
18  
19  
20  
21

22 The findings of this review will be useful to LTC facility administrators interested in  
23 adopting EHRs into their organization by helping them identify barriers to overcome and  
24 opportunities to lever. Policymakers may also find the identified factors useful when attempting  
25 to increase EHR adoption in the long-term care industry. Additionally, vendors can benefit from  
26 this article's information so they can focus the software-development process of EHRs on the  
27 more salient facilitators and barriers to adoption.  
28  
29  
30  
31  
32  
33  
34  
35  
36  
37  
38  
39  
40  
41  
42  
43  
44  
45  
46  
47  
48  
49  
50  
51  
52  
53  
54  
55  
56  
57  
58  
59  
60

## METHODS

### Data

Data for this review were gathered from three separate databases: Google Scholar, Cumulative Index of Nursing and Allied Health Literature (CINAHL) Complete via EBSCO Host, and PubMed (which queries MEDLINE). Search criteria focused on EHR adoption in long-term care. To avoid the bandwagon effect, the authors independently reviewed the articles identified during the search. Following independent reviews, authors compared and discussed the articles and reason for inclusion in or exclusion from the study. Articles were only included in the final study if selected by at least two reviewers. An affinity matrix was created to identify frequency of both facilitators and barriers in the literature.

### Sample

Research databases were queried using key terms from the Medical Subject Headings (MeSH) at the National Center for Biotechnology Information (NCBI). The MeSH database revealed multiple terms for the EHR, as predicted. The two most prevalent search terms for LTC, appropriate for this study, were “nursing home” and “skilled nursing facility.” Several exclusion criteria were implemented through filters. Searches were limited to peer-reviewed journal articles in U.S., published in the English language from 2009-2014 (n = 22). This process is illustrated by Figure 1.

Figure 1. An illustration of the literature review process

### Standard for review and summary measures

The 2009 version of the preferred reporting items for systematic reviews and meta-analyses (PRISMA) was used as the standard and template for the review process. The primary

1  
2  
3 summary measures for this review are the discrete frequency and statistical average of identified  
4  
5 operators (facilitators and barriers) over the total identified.  
6  
7  
8  
9  
10  
11  
12  
13  
14  
15  
16  
17  
18  
19  
20  
21  
22  
23  
24  
25  
26  
27  
28  
29  
30  
31  
32  
33  
34  
35  
36  
37  
38  
39  
40  
41  
42  
43  
44  
45  
46  
47  
48  
49  
50  
51  
52  
53  
54  
55  
56  
57  
58  
59  
60

For peer review only

## RESULTS

### Table of findings

The findings were summarized and inserted into the facilitators and barriers table after the authors chose articles to create the literature review. All duplicate articles were accounted for and consolidated before the findings table was created. The authors then reanalyzed the articles and identified the individual factors affecting EHR adoption in LTC facilities after the articles reached information saturation. These factors were then compiled into a frequency table to aid in the analysis. Results are summarized in Table 1.

Table 1. Summarized facilitators and barriers identified in the literature

| # | Authors                   | Facilitators                                                                                                                                                                                                                                      | Barriers                                                                                                                                                                                                                |
|---|---------------------------|---------------------------------------------------------------------------------------------------------------------------------------------------------------------------------------------------------------------------------------------------|-------------------------------------------------------------------------------------------------------------------------------------------------------------------------------------------------------------------------|
| 4 | Wolf L, et al. (2012).    | <ul style="list-style-type: none"> <li>Emerging payment methods could encourage EHR adoption.</li> <li>“Quality Improvement Organizations” may increase adoption because they provide technical support that many LTC facilities need.</li> </ul> | <ul style="list-style-type: none"> <li>HITECH incentives only focus on acute care and primary physicians.</li> <li>Expanding the incentives to LTC facilities may be too costly.</li> </ul>                             |
| 5 | Wang T, et al. (2012).    | <ul style="list-style-type: none"> <li>Anticipating state and federal requirements.</li> <li>Good communication between vendors and LTC facilities.</li> <li>Education and training programs.</li> </ul>                                          | <ul style="list-style-type: none"> <li>Lack of initial investment resources.</li> <li>No technical infrastructure.</li> <li>Not enough time to implement the EHR.</li> <li>Lack of space for the new system.</li> </ul> |
| 6 | Resnick H, et al. (2009). | <ul style="list-style-type: none"> <li>Error reduction.</li> <li>Quality.</li> <li>Efficiency.</li> <li>Better health outcomes.</li> </ul>                                                                                                        | <ul style="list-style-type: none"> <li>Cost.</li> <li>Complex systems (implementation).</li> <li>No standards (external).</li> </ul>                                                                                    |
| 7 | Davidson J. (2009).       | <ul style="list-style-type: none"> <li>Comprehensive implementation planning.</li> <li>Governmental initiatives.</li> <li>Management and staff support.</li> <li>.</li> </ul>                                                                     | <ul style="list-style-type: none"> <li>Cost.</li> <li>Privacy issues.</li> <li>Incorrect vendor.</li> </ul>                                                                                                             |
| 8 | Hamid F, et al. (2013).   | <ul style="list-style-type: none"> <li>EHR satisfaction increases when the users understand the benefits.</li> <li>Supportive management.</li> <li>Training programs.</li> </ul>                                                                  | <ul style="list-style-type: none"> <li>Cost.</li> <li>Perceived lack of usefulness.</li> <li>Time consuming.</li> </ul>                                                                                                 |



| #  | Authors                      | Facilitators                                                                                                                                                                                                                         | Barriers                                                                                                                                                                                                                                                                                              |
|----|------------------------------|--------------------------------------------------------------------------------------------------------------------------------------------------------------------------------------------------------------------------------------|-------------------------------------------------------------------------------------------------------------------------------------------------------------------------------------------------------------------------------------------------------------------------------------------------------|
| 9  | Alexander G, et al. (2009).  | <ul style="list-style-type: none"> <li>• Improve clinical decision making.</li> <li>• Earlier intervention.</li> <li>• Time savings.</li> </ul>                                                                                      | <ul style="list-style-type: none"> <li>• IT sophistication negatively correlated with detection of detection of incontinence (implementation issue?)</li> </ul>                                                                                                                                       |
| 10 | Phillips K, et al. (2010).   | <ul style="list-style-type: none"> <li>• Government financial incentives.</li> <li>• Reduced errors and adverse drug events.</li> <li>• Including users in the design and implementation process.</li> </ul>                         | <ul style="list-style-type: none"> <li>• Adoption costs.</li> <li>• Efficiency outcomes were inconsistent.</li> <li>• Incongruent cost savings.</li> <li>• Lack of interoperability.</li> <li>• Fear of changing the facility culture.</li> </ul>                                                     |
| 11 | Wilkins M. (2009).           | <ul style="list-style-type: none"> <li>• Training and learning the system increases adoption.</li> <li>• Understanding the usefulness of the EHR technology.</li> </ul>                                                              | <ul style="list-style-type: none"> <li>• Facility size.</li> <li>• Lack of change agents or leaders in the facility.</li> <li>• Lack of interoperability.</li> <li>• Cost.</li> <li>• Resistance to change.</li> </ul>                                                                                |
| 12 | Filipova AA. (2013).         | <ul style="list-style-type: none"> <li>• Federal and state government incentives or policy initiatives could offset financial barriers.</li> <li>• Aligning organizational strategic plans could also encourage adoption.</li> </ul> | <ul style="list-style-type: none"> <li>• Financial barriers like no capital to implement an EHR and the cost of hardware and infrastructure.</li> <li>• Organizational barriers.</li> <li>• Legal and regulatory barriers.</li> <li>• Technological barriers.</li> <li>• Network barriers.</li> </ul> |
| 13 | Bezboruah KC, et al. (2014). | <ul style="list-style-type: none"> <li>• Institutional pressure like anticipated regulations and competition pressures increase EHR adoption.</li> </ul>                                                                             | <ul style="list-style-type: none"> <li>• Cost of the electronic system and projected upgrades.</li> <li>• Leaders perceiving staff's resistance to change.</li> <li>• Misunderstanding how EHRs could be useful or not having enough information to choose the right system.</li> </ul>               |
| 14 | Cherry B. (2011).            | <ul style="list-style-type: none"> <li>• Fast-growing elder populations mean quality of care in LTC facilities must be addressed with EHRs.</li> <li>• A strong implementation plan within</li> </ul>                                | <ul style="list-style-type: none"> <li>• Cost and a lack of capital resources.</li> <li>• Lack of industry standards.</li> <li>• Complicated</li> </ul>                                                                                                                                               |

| #  | Authors                       | Facilitators                                                                                                                                                                                                                                                                                                        | Barriers                                                                                                                                                                                                                                                                                                                                                        |
|----|-------------------------------|---------------------------------------------------------------------------------------------------------------------------------------------------------------------------------------------------------------------------------------------------------------------------------------------------------------------|-----------------------------------------------------------------------------------------------------------------------------------------------------------------------------------------------------------------------------------------------------------------------------------------------------------------------------------------------------------------|
|    |                               | <p>the facility that aligns with strategic plans.</p> <ul style="list-style-type: none"> <li>Initial and follow-up training programs.</li> <li>A perception shift about the benefits of EHR adoption.</li> </ul>                                                                                                    | <p>implementation processes.</p> <ul style="list-style-type: none"> <li>Lack of technical support.</li> <li>Not enough evidence to support EHR's proposed benefits.</li> </ul>                                                                                                                                                                                  |
| 15 | Grabenbauer L, et al. (2011). | <ul style="list-style-type: none"> <li>Improved communication.</li> <li>Patient data access and sharing.</li> </ul>                                                                                                                                                                                                 | <ul style="list-style-type: none"> <li>Cost.</li> <li>Reduced time with patients.</li> <li>Currently EHRs do not impact population health.</li> </ul>                                                                                                                                                                                                           |
| 20 | Cherry B, et al. (2011).      | <ul style="list-style-type: none"> <li>Rapid patient record retrieval.</li> <li>Better document consistency, quality, and accuracy.</li> <li>Improvements in employee satisfaction and retention.</li> <li>Better patient assessments, oversight, and order processing.</li> <li>Better time management.</li> </ul> | <ul style="list-style-type: none"> <li>Technology and maintenance problems like downtime or learning the new system.</li> <li>Residents thought providers were more focused on the computers than on them.</li> </ul>                                                                                                                                           |
| 23 | Tabar P. (2013).              | <ul style="list-style-type: none"> <li>Perceptions are changing in long-term care; EHRs are becoming a cost of doing business.</li> </ul>                                                                                                                                                                           | <ul style="list-style-type: none"> <li>Most EHRs were built for acute care and LTC facilities had trouble finding a system that met the organization's needs.</li> </ul>                                                                                                                                                                                        |
| 24 | <i>Vendor Group.</i> (2013).  | <ul style="list-style-type: none"> <li>Cost reductions.</li> <li>Improve patient outcomes.</li> <li>State programs could help fund a facility's EHR adoption.</li> </ul>                                                                                                                                            |                                                                                                                                                                                                                                                                                                                                                                 |
| 25 | Yu P, et al. (2013).          | <ul style="list-style-type: none"> <li>Continuous training.</li> <li>Open dialogue with vendors.</li> <li>Balancing EHR accuracy with patient care.</li> </ul>                                                                                                                                                      | <ul style="list-style-type: none"> <li>Staff resisted the new system because personal perceptions about their age, lack of documentation skills, or other reasons created limitations.</li> <li>Information management became too difficult and documents lacked consistency.</li> <li>Providers complained about spending less time with residents.</li> </ul> |
| 26 | Hamann DJ, et al. (2013).     | <ul style="list-style-type: none"> <li>Nonprofit facilities were 40% more likely to adopt EHRs.</li> </ul>                                                                                                                                                                                                          | <ul style="list-style-type: none"> <li>For-profit facilities lagged behind in EHR adoption</li> </ul>                                                                                                                                                                                                                                                           |

| #  | Authors                  | Facilitators                                                                                                                                                                                                                                                                                         | Barriers                                                                                                                                                                                                                                                                           |
|----|--------------------------|------------------------------------------------------------------------------------------------------------------------------------------------------------------------------------------------------------------------------------------------------------------------------------------------------|------------------------------------------------------------------------------------------------------------------------------------------------------------------------------------------------------------------------------------------------------------------------------------|
|    |                          | <ul style="list-style-type: none"> <li>• Nonprofits have more regulations, so may need the benefits of EHRs.</li> </ul>                                                                                                                                                                              | <p>rates.</p> <ul style="list-style-type: none"> <li>• Fewer regulations enable for-profit facilities to invest in cost-effective endeavors and avoid the expense of EHR implementation.</li> </ul>                                                                                |
| 27 | Vest JR, et al. (2013).  | <ul style="list-style-type: none"> <li>• More EHR vendors.</li> <li>• Trends show electronic record use is on the rise.</li> <li>• Meaningful use makes EHRs more prevalent.</li> </ul>                                                                                                              | <ul style="list-style-type: none"> <li>• Lagging widespread EHR adoption.</li> <li>• Misaligned incentives.</li> </ul>                                                                                                                                                             |
| 28 | Weaver S. (2011).        | <ul style="list-style-type: none"> <li>• Error reduction (quality).</li> <li>• Improved efficiency.</li> <li>• Consumer (user) perceptions</li> <li>• Improved health outcomes</li> </ul>                                                                                                            | <ul style="list-style-type: none"> <li>• Difficulties transitioning from paper to EHR. (Implementation .)</li> <li>• Training becomes paramount.</li> </ul>                                                                                                                        |
| 29 | Gruber N, et al. (2010). | <ul style="list-style-type: none"> <li>• Strong implementation team.</li> <li>• Communicate often and thoroughly.</li> <li>• Set goals, tasks, and schedules for the implementation.</li> <li>• Reduced errors.</li> <li>• Improved documentation.</li> </ul>                                        | <ul style="list-style-type: none"> <li>• Minor increases in operating expenses.</li> <li>• Training.</li> </ul>                                                                                                                                                                    |
| 30 | Holup AA, et al. (2014). | <ul style="list-style-type: none"> <li>• Rapidly aging populations stresses the need to create interoperable, coordinated EHRs for LTC facilities.</li> </ul>                                                                                                                                        | <ul style="list-style-type: none"> <li>• Long-term care EHRs are not as comprehensive as acute care EHRs.</li> </ul>                                                                                                                                                               |
| 31 | Holup AA, et al. (2013). | <ul style="list-style-type: none"> <li>• Created better health outcomes.</li> <li>• Reduced extra costs.</li> <li>• Improved delivery and quality.</li> <li>• An increasing elder population makes implementing EHRs a necessity.</li> <li>• Nonprofits were more likely to utilize EHRs.</li> </ul> | <ul style="list-style-type: none"> <li>• High initial investment means slower adoption in facilities that cannot afford the EHR system, which slows the rate of becoming better integrated with acute care.</li> <li>• Facility characteristics determine EHR adoption.</li> </ul> |

An analysis of the articles in the systematic literature review revealed multiple facilitators and barriers to adopting an EHR in LTC. The facilitators to adoption included error reduction, clinical and administrative efficiency, cost savings, health outcomes, access and transfer to information, project planning, user perceptions, security, facility characteristics, and time

1  
2  
3 savings. The barriers to adoption included costs, users' negative perception, implementation  
4  
5 issues, external factors, lack of proper training, incompatible facility characteristics, cultural  
6  
7 change, ineffective project planning, security concerns, staff retention, and incompatible system  
8  
9 issues.  
10

### 11 12 13 **Facilitators**

14  
15  
16 The determined facilitators associated with EHR adoption were: access and transfer of  
17  
18 information, long-run cost savings, error reduction, clinical and administrative efficiency, project  
19  
20 planning, security, user perceptions, facility characteristics, health outcomes, time savings, and  
21  
22 staff retention. The facilitators also have narrowed subsections throughout the articles. The  
23  
24 benefits LTC facilities faced after adopting EHRs are connected to the facilitators. For example,  
25  
26 facilities realized an ability to get to patient records quickly and easily, which is related to access  
27  
28 and transfer of information.[7,8,15, 20] Cost savings looked at the long-run facility savings and  
29  
30 how an EHR is an investment with benefits that take time to realize.[23,24] Error reduction was  
31  
32 another benefit of using EHRs, expressed as fewer prescription errors, more patient medication  
33  
34 and allergy alerts, and more overall health safeguards.[8,9,20] Efficiency enabled rapid  
35  
36 information exchange through administrative channels, improved productivity and consistency,  
37  
38 and better communication between clinical and administrative departments.[9-11,15,20]  
39  
40  
41  
42  
43  
44

### 45 46 **Barriers**

47  
48 The barriers varied in topic specification. The broad categories determined from the  
49  
50 literature review were: cost savings, user perception, implementation issues, external factors,  
51  
52 training, facility characteristics, cultural change, project planning, security, staff retention, and  
53  
54  
55  
56  
57  
58  
59  
60

1  
2  
3 system issues. Each broader category has sub-issues that LTC facilities face during EHR  
4  
5 adoption.  
6  
7

8  
9 Of the sub-issues, cost barriers were a consistent concern because adopting and  
10 implementing an EHR requires a substantial initial investment. Other cost concerns stem from  
11 the lack of funding for LTC facilities, future upgrades, and maintenance that will be necessary to  
12 successfully use the EHR.[8,13]  
13  
14  
15  
16  
17

18  
19 User perception barriers included issues with professional and public acceptance of the  
20 new system as well as functionality problems.[8-10] Implementation barriers were lack of  
21 complete understanding from the staff, too little training during and after implementation, and  
22 lack of time for implementation and understanding.[5,6,14,20] The external factors that present  
23 implementation problems were employee recruitment, lack of industry standards, facility  
24 location, and impact on the population.[5,14,15]  
25  
26  
27  
28  
29  
30  
31  
32  
33

34 Table 2. Factors identified in the literature  
35  
36

| Factors                              | Occurrences by Article Reference Number | Total Occurrences |
|--------------------------------------|-----------------------------------------|-------------------|
| <b>Facilitators</b>                  |                                         |                   |
| Error Reduction                      | 6, 7, 8, 9, 10, 20, 28, 29              | 8                 |
| Clinical & Administrative Efficiency | 6, 9, 10, 11, 15, 20, 28                | 7                 |
| Health Outcomes                      | 6, 9, 10, 20, 24, 28, 31                | 7                 |
| Cost Savings                         | 7, 10, 13, 23, 24, 26, 27               | 6                 |
| Access and Transfer to Information   | 7, 8, 10, 15, 20                        | 5                 |
| Project Planning                     | 4, 8, 14, 29                            | 4                 |
| User Perceptions                     | 8, 13, 14, 20                           | 4                 |
| Security                             | 10, 13, 26                              | 3                 |
| Facility Characteristics             | 14, 30, 31                              | 3                 |
| Time Saving                          | 8, 9, 20                                | 3                 |
| <b>Barriers</b>                      |                                         |                   |

|                          |                                    |    |
|--------------------------|------------------------------------|----|
| Cost                     | 5, 6, 7, 8, 10, 11, 12, 13, 14, 15 | 10 |
| User Perceptions         | 5, 8, 10, 13, 14, 15, 20, 25       | 8  |
| Implementation Issues    | 5, 6, 8, 9, 10, 14, 15, 25         | 8  |
| External Factors         | 5, 6, 10, 11, 14, 15, 30           | 7  |
| Training                 | 14, 15, 20, 25, 28,29              | 6  |
| Facility Characteristics | 5, 14, 23, 31                      | 4  |
| Cultural Change          | 10, 25                             | 2  |
| Project Planning         | 10, 13                             | 2  |
| Security                 | 8, 25                              | 2  |
| Staff Retention          | 14                                 | 1  |
| System Issues            | 25                                 | 1  |

## DISCUSSION

Many factors are identified in association with adoption of EHR technology in LTC facilities. The review identified error reduction and clinical and administrative efficiency as the facilitators to EHR adoption in LTC, and cost as the barrier most often identified in the literature.

The literature suggests that quality measures would increase if EHRs were more prevalent in LTC facilities, but vendors' main focus is the acute care environment;[10,21] which make the current EHRs impractical for most LTC facilities.[10,11,23] The literature also suggests that the adoption rate could increase if there were standardization in the EHR market, which would make systems easier to use across diverse healthcare environments.[10]

Vendors would benefit from connecting with long-term care leaders to understand how EHRs fit long-term care strategic planning. A useful EHR helps LTC facilities improves quality, reduces errors, aids with billing and reimbursement, increases employee satisfaction, and may also increase employee retention.[6,8,13] Long-term care facilities need EHRs that are interoperable with other hospital systems so transfers and coordination of care become easier and have less errors. Vendors would benefit from understanding how LTC facilities use EHRs and how to make them more compatible for long-term care needs.

The cost of implementing the EHR was the most prevalent barrier. Many facilities may reject acquiring or installing an EHR because the initial cost is so high and maintaining and upgrading the EHR may also be too costly.[5-15,20] Lack of initial capital could inhibit the first step of considering adopting an EHR. There was a general theme that if LTC facilities had funding, they could become meaningful EHR users more quickly. While cost is a barrier, it is important to point out that many studies stressed the need for LTC facilities to be coordinated with acute care hospitals to run more efficiently and productively. Finding the money required to

1  
2  
3 execute an EHR is critical to LTC facilities gaining the information it needs to make improved  
4  
5 clinical decisions.  
6

7  
8 Cost was a running topic among many studies because the HITECH Act's meaningful  
9  
10 use incentives do not include LTC facilities. Long-term care facilities lack the ability to  
11  
12 participate the HITECH incentive program, yet there is a gap in research that explores different  
13  
14 funding alternatives for long-term care.  
15

16  
17 The literature agrees on the significance that user perceptions plays on EHR adoption in  
18  
19 LTC environments.[5,8,10,13-15,20,25] Perception can manifest as something that can hinder or  
20  
21 help EHR adoption at LTC facilities. Rejecting an EHR may be due to a lack of understanding  
22  
23 about the user benefits,[8] which might be connected to fear of change.[13] The perception that  
24  
25 an EHR system will simply not be useful could also be a result of marketing shortfalls on the part  
26  
27 of EHR vendors. Lack of usefulness may also result from not effectively implementing the  
28  
29 system and failing to achieve expected benefits. However, concerns that the system will be  
30  
31 difficult to use can be addressed by selecting a system with a focus on user interfaces.  
32  
33

34  
35 Furthermore, misunderstanding EHR benefits may lead to a perception that using this technology  
36  
37 will reduce the amount of time physicians and nurses spend with residents.[15,20,25] logically,  
38  
39 an emphasis on facilitators such as cost savings and security improvements should also help  
40  
41 assuage negative perceptions. [26,27] A surprising finding was that the negative impact  
42  
43 providers perceived was due to a lack of training.[6,14,15,28,29] Training should help people  
44  
45 who lack general computer skills, documentation skills, and people who may find the systems  
46  
47 difficult to navigate.[25]  
48  
49  
50

51  
52 Administrators' perceptions about the changing regulatory and competitive long-term  
53  
54 care environment may present some EHR adoption opportunities. Reasons facilities chose to  
55  
56  
57  
58  
59  
60



1  
2  
3 adopt an EHR include anticipation about increases in the regulatory environment and changes to  
4 reimbursement.[4,13,30] Some nursing home administrators feared increased regulations in the  
5 industry, and this prompted EHR adoption to prepare for a possible mandate.[13,31] Others  
6 chose to adopt EHRs due to emerging payment methods, such as bundled payments, which  
7 require better coordination of care with outside entities to receive higher reimbursements.[4] The  
8 competitive long-term care environment steered some organizations to adopt EHRs to emulate  
9 competitors' EHR success.[13] The competitive advantage of EHRs should be explained to  
10 decision-makers so they can confidently adopt the systems. Additionally, policymakers must  
11 offer incentives along with the increases in regulations and changes in reimbursement; unfunded  
12 mandates would degrade EHR perceptions in long-term care.  
13  
14  
15  
16  
17  
18  
19  
20  
21  
22  
23  
24  
25

26  
27 Adopting an EHR relies heavily on the execution of the implementation process. Many  
28 studies agreed on the need for a strategic plan that accounts for the size, governance, costs,  
29 facility needs, and regulatory requirements of the internal and external  
30 environments.[8,10,13,14]  
31  
32  
33  
34  
35

### 36 **Limitations**

37  
38 This review summarizes current and comprehensive data about EHR adoption facilitators  
39 and barriers for LTC facilities. The lack of evidence written about EHR adoption among LTC  
40 facilities and the search database limits led to the exhaustive nature of adoption factors of the  
41 study. This study was limited to only current research, which helped create a comparison for  
42 LTC facilities that want to implement an EHR in today's environment.  
43  
44  
45  
46  
47  
48  
49

### 50 **Conclusions**

51  
52 It is important to study factors affecting EHR adoption in LTC facilities because those  
53 facilities do not receive HITECH incentives. This study identified numerous facilitating factors  
54  
55  
56  
57  
58  
59  
60

1  
2  
3 and barriers through a systematic review of current articles in three scholarly databases. This  
4  
5 information can be useful for decision-makers attempting successful EHR adoption in their LTC  
6  
7 facility, policymakers trying to increase adoption rates without expanding incentives, and  
8  
9 vendors who wish to create EHRs that coordinate with long-term care.  
10  
11  
12  
13  
14  
15  
16  
17  
18  
19  
20  
21  
22  
23  
24  
25  
26  
27  
28  
29  
30  
31  
32  
33  
34  
35  
36  
37  
38  
39  
40  
41  
42  
43  
44  
45  
46  
47  
48  
49  
50  
51  
52  
53  
54  
55  
56  
57  
58  
59  
60

For peer review only

**FUNDING**

This research received no specific grant from any funding agency in the public, commercial or not-for-profit sectors'

There are no conflicts of interest identified between the authors, results, or publication.

There were neither humans nor animals used as subjects of this research. In accordance with 45CFR46, this research qualifies as IRB Exempt.

For peer review only

1  
2  
3 **ACKNOWLEDGEMENTS & STATEMENT OF CONTRIBUTION**  
4

5 Authors provided equal contribution to the final product. The topic originated as directed  
6 research for a class for a Masters in Health Administration. The research was intended as both  
7 instructional on the topic and on writing for journals for publication. Dr.s Kruse and Mileski  
8 provided guidance, advice, and independent analysis to validate that of the graduate students.  
9  
10  
11  
12  
13  
14  
15  
16  
17  
18  
19  
20  
21  
22  
23  
24  
25  
26  
27  
28  
29  
30  
31  
32  
33  
34  
35  
36  
37  
38  
39  
40  
41  
42  
43  
44  
45  
46  
47  
48  
49  
50  
51  
52  
53  
54  
55  
56  
57  
58  
59  
60

For peer review only

1  
2  
3  
4  
5  
6  
7  
8  
9  
10  
11  
12  
13  
14  
15  
16  
17  
18  
19  
20  
21  
22  
23  
24  
25  
26  
27  
28  
29  
30  
31  
32  
33  
34  
35  
36  
37  
38  
39  
40  
41  
42  
43  
44  
45  
46  
47  
48  
49  
50  
51  
52  
53  
54  
55  
56  
57  
58  
59  
60  
**REFERENCES**

1. Health Information Technology for Economic and Clinical Health Act, 42 U.S.C. § 201 2009.  
URL:  
[http://www.healthit.gov/sites/default/files/hitech\\_act\\_excerpt\\_from\\_arra\\_with\\_index.pdf](http://www.healthit.gov/sites/default/files/hitech_act_excerpt_from_arra_with_index.pdf)  
[accessed 3/18/2014] WebCite URL: <http://www.webcitation.org/6OApfh2QK>
2. Brandeis GH, Hogan M, Murphy M, et al. (2007). Electronic health record implementation in community nursing homes. *J Am Med Dir Assoc*, 2007;8(1): 31-34.
3. Assistant Secretary for Planning and Evaluation. EHR Payment Incentives for Providers Ineligible for Payment Incentives and Other Funding Study. URL:  
<http://aspe.hhs.gov/daltcp/reports/2013/EHRPIap.shtml#appendD> [Accessed 9/9/2014]
4. Wolf L, Harvell J, Jha AK. Hospitals Ineligible For Federal Meaningful-Use Incentives Have Dismally Low Rates Of Adoption Of Electronic Health Records. *Health Aff (Millwood)*, 2012;31(3), 505–513. doi:10.1377/hlthaff.2011.0351 PMID: 22392661
5. Wang T, Biedermann S. Adoption and Utilization of Electronic Health Record Systems by Long-Term Care Facilities in Texas. *Perspect Health Inf Manag*, 2012;1–14. PMID: 22737099
6. Resnick HE, Manard B, Stone R, et al. Use of electronic information systems in nursing homes: United States, 2004. *J Am Med Inform Assoc, JAMIA*, 2009;16(2): 179-186.
7. Davidson J. Electronic medical records: what they are and how they will revolutionize the delivery of resident care... first of a two-part series. *Canadian Nursing Home [serial online]*. 2009;20(3):15-16. Available from: CINAHL Complete, Ipswich, MA. Accessed July 9, 2014. ISSN: 0847-5520

- 1  
2  
3 8. Hamid F, Cline T. Providers' Acceptance Factors and their Perceived Barriers to Electronic  
4  
5 Health Record (EHR) Adoption. *Online J Nurs Inform (OJNI)* 2013;17(3).  
6
- 7  
8 9. Alexander GL, Madsen R. IT sophistication and quality measures in nursing homes. *J*  
9  
10 *Gerontol Nurs* 2009;35(7): 22.  
11
- 12  
13 10. Phillips K, Wheeler C, Campbell J, et al. Electronic medical records in long-term care. *J*  
14  
15 *Hosp Mark Public Relations*, 2010;20(2):131–142. doi:10.1080/15390942.2010.493377  
16  
17 PMID: 20582852  
18
- 19  
20 11. Wilkins M. Factors influencing acceptance of electronic health records in hospitals. *Perspect*  
21  
22 *Health Inf Manag*, 2009;6, 18p. PMID: 20169018  
23
- 24  
25 12. Filipova AA. Electronic Health Records Use and Barriers and Benefits to Use in Skilled  
26  
27 Nursing Facilities: *CIN: CIN Plus*, 2013;31(7):305–318.  
28  
29 doi:10.1097/NXN.0b013e318295e40e PMID: 23774447  
30
- 31  
32 13. Bezboruah KC, Hamann, DJ, Smith JD. Management attitudes and technology adoption in  
33  
34 long-term care facilities. *J Health Organ Manag*, 2014;28(3):4–4.  
35
- 36  
37 14. Cherry B. Assessing Organizational Readiness for Electronic Health Record Adoption in  
38  
39 Long-Term Care Facilities. *J Gerontol Nurs*, 2011;37(10):14–19.  
40  
41 doi:http://dx.doi.org/10.3928/00989134-20110831-06  
42
- 43  
44 15. Grabenbauer L, Skinner A, Windle J. Electronic Health Record Adoption - Maybe It's not  
45  
46 about the Money: Physician Super-Users, Electronic Health Records and Patient Care. *Appl*  
47  
48 *Clin Inform*, 2011;2(4):460–471. doi:10.4338/ACI-2011-05-RA-0033 PMID: 23616888  
49
- 50  
51 16. McCall N. Long-term care: Definition, demand, cost, and financing. URL:  
52  
53 <http://www.ache.org/PUBS/1mccall.pdf>, Webcitation:  
54  
55 <http://www.webcitation.org/6SKzjPXV1>  
56  
57  
58  
59  
60

- 1  
2  
3  
4  
5  
6  
7  
8  
9  
10  
11  
12  
13  
14  
15  
16  
17  
18  
19  
20  
21  
22  
23  
24  
25  
26  
27  
28  
29  
30  
31  
32  
33  
34  
35  
36  
37  
38  
39  
40  
41  
42  
43  
44  
45  
46  
47  
48  
49  
50  
51  
52  
53  
54  
55  
56  
57  
58  
59  
60
17. Association on aging. URL: [http://www.aoa.gov/Aging\\_Statistics/](http://www.aoa.gov/Aging_Statistics/) [accessed 9/4/2014]  
Webcitation: <http://www.webcitation.org/6SL0f14rt>
  18. Institute of Medicine, Key capabilities of an electronic health record, Institute of Medicine  
2003 Jul. URL <http://www.iom.edu/Reports/2003/Key-Capabilities-of-an-Electronic-Health-Record-System.aspx> [accessed 9/4/2014] WebCite URL:  
<http://www.webcitation.org/6ODtL6HKG>
  19. U.S. Health and Human Services. Learn EHR Basics. URL:  
<http://www.healthit.gov/providers-professionals/learn-ehr-basics> [accessed 9/4/2014]  
Webcitation: <http://www.webcitation.org/6SL21pUQO>
  20. Cherry B, Ford E, Peterson L. Experiences with electronic health records: Early adopters in  
long-term care facilities. *Health Care Manage Rev* 2011; 36(3):265–274.  
doi:10.1097/HMR.0b013e31820e110f PMID: 21646885
  21. Tripp JS, Narus SP, Magill MK, et al. Evaluating the accuracy of existing EMR data as  
predictors of follow-up providers. *J Am Med Inform Assoc, JAMIA*, 2008;15(6):787-790.  
DOI: 10.1197/jamia.M2753 PMID: 18755996
  22. Robison J, Shugrue N, Fortinsky RH, et al. (2013). Long-Term Supports and Services  
Planning for the Future: Implications From a Statewide Survey of Baby Boomers and Older  
Adults. *Gerontologist*, gnt094. doi: 10.1093/geront/gnt094 PMID: 23990621
  23. Tabar P. Why EHRs matter to LTC's future. *Long-Term Living: For the Continuing Care  
Professional*, 2013;62(1):14–16.
  24. Vendor Group Develops EHR Code of Conduct. *J AHIMA*, 2013;84(8): 12–13.

- 1  
2  
3 25. Yu P, Zhang Y, Gong Y, et al. Unintended adverse consequences of introducing electronic  
4 health records in residential aged care homes. *Int J Med Inform*, 2013;82(9):772–788.  
5  
6 doi:10.1016/j.ijmedinf.2013.05.008 PMID: 23770027  
7  
8  
9  
10 26. Hamann DJ, Bezboruah KC. Utilization of Technology by Long-Term Care Providers  
11 Comparisons Between For-Profit and Nonprofit Institutions. *J Aging Health*,  
12 2013;25(4):535–554. doi:10.1177/0898264313480238 PMID: 23509114  
13  
14  
15  
16  
17 27. Vest JR, Yoon J, Bossak BH. Changes to the electronic health records market in light of  
18 health information technology certification and meaningful use. *J Am Med Inform Assoc*:  
19 *JAMIA*, 2013;20(2):227–232. doi:10.1136/amiajnl-2011-000769 PMID: 22917839  
20  
21  
22  
23  
24 28. Goodman C. Savings in electronic medical record systems? Do it for the quality. *Health Aff*  
25 *(Millwood)*, 2005;24(5):1124–1126. PMID: 16162554  
26  
27  
28  
29 29. Gruber N, Darragh J, Puccia P, et al. Embracing change to improve performance:  
30 implementation of an electronic health record system. *Long-Term Living: For the Continuing*  
31 *Care Professional*, 2010;59(1), 28–31.  
32  
33  
34  
35  
36 30. Holup AA, Dobbs D, Temple A, et al. Going Digital Adoption of Electronic Health Records  
37 in Assisted Living Facilities. *J Appl Gerontol*, 2014;33(4):494–504.  
38  
39 doi:10.1177/0733464812454009 PMID: 24781968  
40  
41  
42  
43 31. Holup AA, Dobbs D, Meng H, et al. Facility characteristics associated with the use of  
44 electronic health records in residential care facilities. *J Am Med Inform Assoc*,  
45 2013;20(4):787–791. doi:10.1136/amiajnl-2012-001564 PMID: 23645538  
46  
47  
48  
49  
50 32. Ford EW, Menachemi N, Peterson LT, et al. Resistance Is Futile: But It Is Slowing the Pace  
51 of EHR Adoption Nonetheless. *J Am Med Inform Assoc, JAMIA*, 2009;16(3):274–281.  
52  
53  
54  
55  
56  
57  
58  
59  
60



| # | Authors                                                                                                                       | Study Characteristics                                                                                                                                                                                                       | Facilitators                                                                                                                                                                                                                                      | Barriers                                                                                                                                                                                                                |
|---|-------------------------------------------------------------------------------------------------------------------------------|-----------------------------------------------------------------------------------------------------------------------------------------------------------------------------------------------------------------------------|---------------------------------------------------------------------------------------------------------------------------------------------------------------------------------------------------------------------------------------------------|-------------------------------------------------------------------------------------------------------------------------------------------------------------------------------------------------------------------------|
| 4 | Wolf L, et al. (2012). Hospitals ineligible for federal meaningful use incentives have dismally low rates of adoption of EHR. | <ul style="list-style-type: none"> <li>Secondary data analysis, 2009 health IT supplement to the AHA survey.</li> <li>Hospitals reported on 32 clinical functions of an EHR system and extent of implementation.</li> </ul> | <ul style="list-style-type: none"> <li>Emerging payment methods could encourage EHR adoption.</li> <li>“Quality Improvement Organizations” may increase adoption because they provide technical support that many LTC facilities need.</li> </ul> | <ul style="list-style-type: none"> <li>HITECH incentives only focus on acute care and primary physicians.</li> <li>Expanding the incentives to LTC facilities may be too costly.</li> </ul>                             |
| 5 | Wang T, et al. (2012). Adoption and utilization of EHR systems by LTC in Texas.                                               | <ul style="list-style-type: none"> <li>Survey instrument mailed to all Texas LTC facilities.</li> <li>Data were self-reported rates of adoption.</li> </ul>                                                                 | <ul style="list-style-type: none"> <li>Anticipating state and federal requirements.</li> <li>Good communication between vendors and LTC facilities.</li> <li>Education and training programs.</li> </ul>                                          | <ul style="list-style-type: none"> <li>Lack of initial investment resources.</li> <li>No technical infrastructure.</li> <li>Not enough time to implement the EHR.</li> <li>Lack of space for the new system.</li> </ul> |
| 6 | Resnick H, et al. (2009). Use of Electronic Information Systems in Nursing Homes: United States.                              | <ul style="list-style-type: none"> <li>Secondary data analysis from the National Nursing Home Survey (NNHS).</li> <li>The data reported a wide range in level of adoption.</li> </ul>                                       | <ul style="list-style-type: none"> <li>Error reduction.</li> <li>Quality.</li> <li>Efficiency.</li> <li>Better health outcomes.</li> </ul>                                                                                                        | <ul style="list-style-type: none"> <li>Cost.</li> <li>Complex systems (implementation).</li> <li>No standards (external).</li> </ul>                                                                                    |
| 7 | Davidson J. (2009). Electronic Medical Records: what they are and how they will revolutionize the delivery of care.           | <ul style="list-style-type: none"> <li>Summary of articles (non-study) and concepts justifying the creation of the Canadian Health Infoway..</li> </ul>                                                                     | <ul style="list-style-type: none"> <li>Comprehensive implementation planning.</li> <li>Governmental initiatives.</li> <li>Management and staff support.</li> </ul>                                                                                | <ul style="list-style-type: none"> <li>Cost.</li> <li>Privacy issues.</li> <li>Incorrect vendor.</li> </ul>                                                                                                             |
| 8 | Hamid F, et al. (2013). Providers Acceptance Factors and                                                                      | <ul style="list-style-type: none"> <li>Survey instrument given to physicians (n=24), nurse practitioners and PAs (n= 20) in acute-care settings.</li> </ul>                                                                 | <ul style="list-style-type: none"> <li>EHR satisfaction increases when the users understand the benefits.</li> <li>Supportive</li> </ul>                                                                                                          | <ul style="list-style-type: none"> <li>Cost.</li> <li>Perceived lack of usefulness.</li> <li>Time consuming.</li> </ul>                                                                                                 |

| #  | Authors                                                                                      | Study Characteristics                                                                                                                                                                                                                                                       | Facilitators                                                                                                                                                                                                 | Barriers                                                                                                                                                                                                                                          |
|----|----------------------------------------------------------------------------------------------|-----------------------------------------------------------------------------------------------------------------------------------------------------------------------------------------------------------------------------------------------------------------------------|--------------------------------------------------------------------------------------------------------------------------------------------------------------------------------------------------------------|---------------------------------------------------------------------------------------------------------------------------------------------------------------------------------------------------------------------------------------------------|
|    | their Perceived Barriers to Electronic Health Record EHR Adoption.                           |                                                                                                                                                                                                                                                                             | management.<br><ul style="list-style-type: none"> <li>• Training programs.</li> </ul>                                                                                                                        |                                                                                                                                                                                                                                                   |
| 9  | Alexander G, et al. (2009). IT Sophistication and Quality Measures in Nursing Homes.         | <ul style="list-style-type: none"> <li>• Survey instrument of 210 nursing homes in Missouri.</li> <li>• Two groups of measurements collected: level of IT sophistication and quality measures, as defined by the U.S. Center for Medicare and Medicaid Services.</li> </ul> | <ul style="list-style-type: none"> <li>• Improve clinical decision making.</li> <li>• Earlier intervention.</li> <li>• Time savings.</li> </ul>                                                              | <ul style="list-style-type: none"> <li>• IT sophistication negatively correlated with detection of incontinence (implementation issue?)</li> </ul>                                                                                                |
| 10 | Phillips K, et al. (2010). Electronic medical records in long-term care.                     | <ul style="list-style-type: none"> <li>• Systematic literature review.</li> </ul>                                                                                                                                                                                           | <ul style="list-style-type: none"> <li>• Government financial incentives.</li> <li>• Reduced errors and adverse drug events.</li> <li>• Including users in the design and implementation process.</li> </ul> | <ul style="list-style-type: none"> <li>• Adoption costs.</li> <li>• Efficiency outcomes were inconsistent.</li> <li>• Incongruent cost savings.</li> <li>• Lack of interoperability.</li> <li>• Fear of changing the facility culture.</li> </ul> |
| 11 | Wilkins M. (2009). Factors influencing acceptance of electronic health records in hospitals. | <ul style="list-style-type: none"> <li>• Survey instrument to members of the Arkansas Hospital Association.</li> <li>• LTC hospitals were cross-tabbed separately from other hospitals.</li> </ul>                                                                          | <ul style="list-style-type: none"> <li>• Training and learning the system increases adoption.</li> <li>• Understanding the usefulness of the EHR technology.</li> </ul>                                      | <ul style="list-style-type: none"> <li>• Facility size.</li> <li>• Lack of change agents or leaders in the facility.</li> <li>• Lack of interoperability.</li> <li>• Cost.</li> <li>• Resistance to change.</li> </ul>                            |
| 12 | Filipova AA. (2013). Electronic Health Records Use and Barriers and Benefits to              | <ul style="list-style-type: none"> <li>• Cross-sectional design.</li> <li>• Mail and web survey instruments.</li> </ul>                                                                                                                                                     | <ul style="list-style-type: none"> <li>• Federal and state government incentives or policy initiatives could offset financial barriers.</li> <li>• Aligning organizational strategic plans could</li> </ul>  | <ul style="list-style-type: none"> <li>• Financial barriers like no capital to implement an EHR and the cost of hardware and infrastructure.</li> <li>• Organizational</li> </ul>                                                                 |

| #  | Authors                                                                                                     | Study Characteristics                                                                                                                                                                                           | Facilitators                                                                                                                                                                                                                                                                                                                                                               | Barriers                                                                                                                                                                                                                                                                                   |
|----|-------------------------------------------------------------------------------------------------------------|-----------------------------------------------------------------------------------------------------------------------------------------------------------------------------------------------------------------|----------------------------------------------------------------------------------------------------------------------------------------------------------------------------------------------------------------------------------------------------------------------------------------------------------------------------------------------------------------------------|--------------------------------------------------------------------------------------------------------------------------------------------------------------------------------------------------------------------------------------------------------------------------------------------|
|    | Use in Skilled Nursing Facilities.                                                                          |                                                                                                                                                                                                                 | also encourage adoption.                                                                                                                                                                                                                                                                                                                                                   | barriers. <ul style="list-style-type: none"> <li>• Legal and regulatory barriers.</li> <li>• Technological barriers.</li> <li>• Network barriers.</li> </ul>                                                                                                                               |
| 13 | Bezboruah KC, et al. (2014). Management attitudes and technology adoption in long-term care facilities      | <ul style="list-style-type: none"> <li>• Exploratory, qualitative case study.</li> </ul>                                                                                                                        | <ul style="list-style-type: none"> <li>• Institutional pressure like anticipated regulations and competition pressures increase EHR adoption.</li> </ul>                                                                                                                                                                                                                   | <ul style="list-style-type: none"> <li>• Cost of the electronic system and projected upgrades.</li> <li>• Leaders perceiving staff's resistance to change.</li> <li>• Misunderstanding how EHRs could be useful or not having enough information to choose the right system.</li> </ul>    |
| 14 | Cherry B. (2011). Management attitudes and technology adoption in long-term care facilities.                | <ul style="list-style-type: none"> <li>• Survey instrument to LTC facilities in Texas.</li> </ul>                                                                                                               | <ul style="list-style-type: none"> <li>• Fast-growing elder populations mean quality of care in LTC facilities must be addressed with EHRs.</li> <li>• A strong implementation plan within the facility that aligns with strategic plans.</li> <li>• Initial and follow-up training programs.</li> <li>• A perception shift about the benefits of EHR adoption.</li> </ul> | <ul style="list-style-type: none"> <li>• Cost and a lack of capital resources.</li> <li>• Lack of industry standards.</li> <li>• Complicated implementation processes.</li> <li>• Lack of technical support.</li> <li>• Not enough evidence to support EHR's proposed benefits.</li> </ul> |
| 15 | Grabenbauer L, et al. (2011). Electronic Health Record Adoption - Maybe It's not about the Money: Physician | <ul style="list-style-type: none"> <li>• Qualitative study conducted to compare two robust EHR solutions.</li> <li>• EHR- savvy users from multiple organizations interviewed through focus groups..</li> </ul> | <ul style="list-style-type: none"> <li>• Improved communication.</li> <li>• Patient data access and sharing.</li> </ul>                                                                                                                                                                                                                                                    | <ul style="list-style-type: none"> <li>• Cost.</li> <li>• Reduced time with patients.</li> <li>• Currently EHRs do not impact population health.</li> </ul>                                                                                                                                |

| #  | Authors                                                                                                                       | Study Characteristics                                                                                                                                                                                                                 | Facilitators                                                                                                                                                                                                                                                                                                                  | Barriers                                                                                                                                                                                                                                                                                     |
|----|-------------------------------------------------------------------------------------------------------------------------------|---------------------------------------------------------------------------------------------------------------------------------------------------------------------------------------------------------------------------------------|-------------------------------------------------------------------------------------------------------------------------------------------------------------------------------------------------------------------------------------------------------------------------------------------------------------------------------|----------------------------------------------------------------------------------------------------------------------------------------------------------------------------------------------------------------------------------------------------------------------------------------------|
|    | Super-Users, Electronic Health Records and Patient Care                                                                       |                                                                                                                                                                                                                                       |                                                                                                                                                                                                                                                                                                                               |                                                                                                                                                                                                                                                                                              |
| 20 | Cherry B, et al. (2011). Experiences with electronic health records: Early adopters in long-term care facilities.             | <ul style="list-style-type: none"> <li>• Semi-structured interviews conducted at 10 LTC sites.</li> <li>• Interviewees consisted of administrators, nurse managers, nurses, certified nurse aides, and other system users.</li> </ul> | <ul style="list-style-type: none"> <li>• Rapid patient record retrieval.</li> <li>• Better document consistency, quality, and accuracy.</li> <li>• Improvements in employee satisfaction and retention.</li> <li>• Better patient assessments, oversight, and order processing.</li> <li>• Better time management.</li> </ul> | <ul style="list-style-type: none"> <li>• Technology and maintenance problems like downtime or learning the new system.</li> <li>• Residents thought providers were more focused on the computers than on them.</li> </ul>                                                                    |
| 23 | Tabar P. (2013). Why EHRs matter to LTC's future                                                                              | <ul style="list-style-type: none"> <li>• Editorial.</li> </ul>                                                                                                                                                                        | <ul style="list-style-type: none"> <li>• Perceptions are changing in long-term care; EHRs are becoming a cost of doing business.</li> </ul>                                                                                                                                                                                   | <ul style="list-style-type: none"> <li>• Most EHRs were built for acute care and LTC facilities had trouble finding a system that met the organization's needs.</li> </ul>                                                                                                                   |
| 24 | Vendor group develops EHR code of conduct. (2013).                                                                            | <ul style="list-style-type: none"> <li>• Journal bulletin board post.</li> </ul>                                                                                                                                                      | <ul style="list-style-type: none"> <li>• Cost reductions.</li> <li>• Improve patient outcomes.</li> <li>• State programs could help fund a facility's EHR adoption.</li> </ul>                                                                                                                                                |                                                                                                                                                                                                                                                                                              |
| 25 | Yu P, et al. (2013). Unintended adverse consequences of introducing electronic health records in residential aged care homes. | <ul style="list-style-type: none"> <li>• Qualitative semi-structured interview study of 9 residential aged care homes.</li> <li>• User perceptions evaluated.</li> </ul>                                                              | <ul style="list-style-type: none"> <li>• Continuous training.</li> <li>• Open dialogue with vendors.</li> <li>• Balancing EHR accuracy with patient care.</li> </ul>                                                                                                                                                          | <ul style="list-style-type: none"> <li>• Staff resisted the new system because personal perceptions about their age, lack of documentation skills, or other reasons created limitations.</li> <li>• Information management became too difficult and documents lacked consistency.</li> </ul> |

| #  | Authors                                                                                                                                             | Study Characteristics                                                                                                                                                                                   | Facilitators                                                                                                                                                                                                       | Barriers                                                                                                                                                                                                                                                |
|----|-----------------------------------------------------------------------------------------------------------------------------------------------------|---------------------------------------------------------------------------------------------------------------------------------------------------------------------------------------------------------|--------------------------------------------------------------------------------------------------------------------------------------------------------------------------------------------------------------------|---------------------------------------------------------------------------------------------------------------------------------------------------------------------------------------------------------------------------------------------------------|
|    |                                                                                                                                                     |                                                                                                                                                                                                         |                                                                                                                                                                                                                    | <ul style="list-style-type: none"> <li>Providers complained about spending less time with residents.</li> </ul>                                                                                                                                         |
| 26 | Hamann DJ, et al. (2013). Utilization of Technology by Long-Term Care Providers Comparisons Between For-Profit and Nonprofit Institutions.          | <ul style="list-style-type: none"> <li>Secondary data analysis of multiple surveys conducted by the CDC.</li> </ul>                                                                                     | <ul style="list-style-type: none"> <li>Nonprofit facilities were 40% more likely to adopt EHRs.</li> <li>Nonprofits have more regulations, so may need the benefits of EHRs.</li> </ul>                            | <ul style="list-style-type: none"> <li>For-profit facilities lagged behind in EHR adoption rates.</li> <li>Fewer regulations enable for-profit facilities to invest in cost-effective endeavors and avoid the expense of EHR implementation.</li> </ul> |
| 27 | Vest JR, et al. (2013). Changes to the electronic health records market in light of health information technology certification and meaningful use. | <ul style="list-style-type: none"> <li>Secondary data analysis of HIMSS data.</li> <li>Hospital referral regions were used to define local markets.</li> <li>Analysis was changes over time.</li> </ul> | <ul style="list-style-type: none"> <li>More EHR vendors.</li> <li>Trends show electronic record use is on the rise.</li> <li>Meaningful use makes EHRs more prevalent.</li> </ul>                                  | <ul style="list-style-type: none"> <li>Lagging widespread EHR adoption.</li> <li>Misaligned incentives.</li> </ul>                                                                                                                                      |
| 28 | Weaver. (2005). EHR adoption in LTC and the HIM value.                                                                                              | <ul style="list-style-type: none"> <li>Practice brief (a regular section in the journal).</li> <li>A publication of practice guidelines for managing health information.</li> </ul>                     | <ul style="list-style-type: none"> <li>Error reduction (quality).</li> <li>Improved efficiency.</li> <li>Consumer (user) perceptions</li> <li>Improved health outcomes</li> </ul>                                  | <ul style="list-style-type: none"> <li>Difficulties transitioning from paper to EHR. (Implementation .)</li> <li>Training becomes paramount.</li> </ul>                                                                                                 |
| 29 | Gruber N, et al. (2010). Embracing change to improve performance: implementation of an                                                              | <ul style="list-style-type: none"> <li>Case study of an implementation of an EHR in a facility.</li> <li>Includes cost, staffing, and experience over 2 years.</li> </ul>                               | <ul style="list-style-type: none"> <li>Strong implementation team.</li> <li>Communicate often and thoroughly.</li> <li>Set goals, tasks, and schedules for the implementation.</li> <li>Reduced errors.</li> </ul> | <ul style="list-style-type: none"> <li>Minor increases in operating expenses.</li> <li>Training.</li> </ul>                                                                                                                                             |

| #  | Authors                                                                                                                               | Study Characteristics                                                                                                                                                                               | Facilitators                                                                                                                                                                                                                                                                               | Barriers                                                                                                                                                                                                                                                                       |
|----|---------------------------------------------------------------------------------------------------------------------------------------|-----------------------------------------------------------------------------------------------------------------------------------------------------------------------------------------------------|--------------------------------------------------------------------------------------------------------------------------------------------------------------------------------------------------------------------------------------------------------------------------------------------|--------------------------------------------------------------------------------------------------------------------------------------------------------------------------------------------------------------------------------------------------------------------------------|
|    | electronic health record system.                                                                                                      |                                                                                                                                                                                                     | <ul style="list-style-type: none"> <li>Improved documentation.</li> </ul>                                                                                                                                                                                                                  |                                                                                                                                                                                                                                                                                |
| 30 | Holup AA, et al. (2014). Going Digital Adoption of Electronic Health Records in Assisted Living Facilities.                           | <ul style="list-style-type: none"> <li>Pilot study examining associations between structural characteristics and adoption and use of EHR as a process characteristic in assisted living.</li> </ul> | <ul style="list-style-type: none"> <li>Rapidly aging populations stresses the need to create interoperable, coordinated EHRs for LTC facilities.</li> </ul>                                                                                                                                | <ul style="list-style-type: none"> <li>Long-term care EHRs are not as comprehensive as acute care EHRs.</li> </ul>                                                                                                                                                             |
| 31 | Holup AA, et al. (2013). Facility characteristics associated with the use of electronic health records in residential care facilities | <ul style="list-style-type: none"> <li>Secondary data analysis of annual survey instrument of the National Survey of Residential Care Facilities.</li> </ul>                                        | <ul style="list-style-type: none"> <li>Created better health outcomes.</li> <li>Reduced extra costs.</li> <li>Improved delivery and quality.</li> <li>An increasing elder population makes implementing EHRs a necessity.</li> <li>Nonprofits were more likely to utilize EHRs.</li> </ul> | <ul style="list-style-type: none"> <li>High initial investment means slower adoption in facilities that cannot afford the EHR system, which slows the rate of becoming better integrated with acute care.</li> <li>Facility characteristics determine EHR adoption.</li> </ul> |

# BMJ Open

## Adoption Factors Associated with Electronic Health Record among Long-Term Care Facilities – A Systematic Review

|                                 |                                                                                                                                                                                                                                                                                                                                                                                                  |
|---------------------------------|--------------------------------------------------------------------------------------------------------------------------------------------------------------------------------------------------------------------------------------------------------------------------------------------------------------------------------------------------------------------------------------------------|
| Journal:                        | <i>BMJ Open</i>                                                                                                                                                                                                                                                                                                                                                                                  |
| Manuscript ID:                  | bmjopen-2014-006615.R1                                                                                                                                                                                                                                                                                                                                                                           |
| Article Type:                   | Research                                                                                                                                                                                                                                                                                                                                                                                         |
| Date Submitted by the Author:   | 09-Dec-2014                                                                                                                                                                                                                                                                                                                                                                                      |
| Complete List of Authors:       | Kruse, Clemens; Texas State University, School of Health Administration<br>Mileski, Michael; Texas State University, School of Health Administration<br>Alaytsev, Vyachelslav; Texas State University, School of Health Administration<br>Carol, Elizabeth; Texas State University, School of Health Administration<br>Williams, Ariana; Texas State University, School of Health Administration |
| <b>Primary Subject Heading</b>: | Health services research                                                                                                                                                                                                                                                                                                                                                                         |
| Secondary Subject Heading:      | Geriatric medicine, Health informatics, Health policy                                                                                                                                                                                                                                                                                                                                            |
| Keywords:                       | Information management < BIOTECHNOLOGY & BIOINFORMATICS, HEALTH SERVICES ADMINISTRATION & MANAGEMENT, Health policy < HEALTH SERVICES ADMINISTRATION & MANAGEMENT                                                                                                                                                                                                                                |
|                                 |                                                                                                                                                                                                                                                                                                                                                                                                  |

SCHOLARONE™  
Manuscripts

## Adoption Factors Associated with Electronic Health Record among Long-Term Care Facilities – A Systematic Review

Clemens Scott Kruse<sup>1</sup>, Michael Mileski<sup>2</sup>, Vyachelslav Alaytsev<sup>3</sup>, Elizabeth Carol<sup>3</sup>, Ariana Williams<sup>3</sup>

1. MBA, MSIT, MHA, PhD, FACHE, CPHIMS, Assistant Professor, Texas State University, San Marcos TX, 78666 U.S.A.
2. DC, MPH, MSHEd, LNFA, Assistant Professor, Texas State University, San Marcos, TX, 78666 U.S.A.
3. Graduate Student, Texas State University, San Marcos TX, 78666, U.S.A.

Corresponding Author:  
Clemens Scott Kruse  
College of Health Professions  
School of Health Administration  
Texas State University  
HPB, 2nd Floor  
601 University Drive  
San Marcos, TX, 78666 U.S.A.  
United States  
Phone: 1 210 355 4742  
Fax: 1 512 245 8712  
Email: [scottkruse@txstate.edu](mailto:scottkruse@txstate.edu)

Keywords: Long-term care (LTC), electronic health record (EHR), electronic medical record (EMR), diffusion of innovation, HITECH Act

3067 words

Running page headline: Factors Associated w EHR Adoption in LTC



## ABSTRACT

**Objectives:** The Health Information Technology for Economic and Clinical Health (HITECH) Act created incentives for adopting electronic health records (EHRs) for some healthcare organizations, but long-term care (LTC) facilities are excluded from those incentives. There are realizable benefits of EHR adoption in LTC facilities; however, there is limited research about this topic. The purpose of this systematic literature review is to identify EHR adoption factors for LTC facilities that are ineligible for the HITECH Act incentives.

**Setting:** We conducted systematic searches of Cumulative Index of Nursing and Allied Health Literature (CINAHL) Complete via Ebsco B. Stephens Company (EBSCO Host), Google Scholar, and the university library search engine to collect data about EHR adoption factors in LTC facilities since 2009.

**Participants:** Search results were filtered by date range, full text, English language, and academic journals (n = 22).

**Interventions:** Multiple members of the research team read each article to confirm applicability and study conclusions.

**Primary and secondary outcome measures:** Researchers identified common themes across the literature: specifically facilitators and barriers to adoption of the EHR in LTC.

**Results:** Results identify facilitators and barriers associated with EHR adoption in LTC facilities. The most common facilitators include access to information and error reduction. The most prevalent barriers include initial costs, user perceptions, and implementation problems.

**Conclusions:** Similarities span the system selection phases and implementation process; of those, cost was the most common mentioned. These commonalities should help leaders in LTC facilities align strategic decisions to EHR adoption. This review may be useful for decision-

1  
2  
3 makers attempting successful EHR adoption, policymakers trying to increase adoption rates  
4  
5 without expanding incentives, and vendors that produce EHRs.  
6  
7

## 8 **STRENGTHS AND LIMITATIONS OF THIS STUDY**

9

10 This systematic review has several strengths and limitations, as detailed below.  
11

### 12 Strengths

- 14 • Adds to a body of knowledge of EHR adoption.
- 15
- 16 • Contributes toward EHR adoption in LTC.
- 17
- 18 • Provides a systematic review, in accordance with PRISMA.
- 19
- 20 • Queries three well known research databases.
- 21
- 22 • Queries use key terms registered with MeSH.
- 23
- 24 • Multiple reviewers determined inclusion and exclusion criteria.
- 25
- 26
- 27
- 28
- 29

### 30 Limitations

- 31 • Only five years were examined.
- 32
- 33 • An objective assessment of study bias was not conducted in this review.
- 34
- 35 • Selection bias will always exist in subjective decisions (inclusion criteria). Controls for  
36 selection bias were enacted: more than one author had to recommend that an article be  
37 included in the study. The identification of both enablers and barriers followed the same  
38 rule.  
39  
40  
41  
42  
43  
44  
45  
46  
47  
48  
49  
50  
51  
52  
53  
54  
55  
56  
57  
58  
59  
60

## INTRODUCTION, BACKGROUND & SIGNIFICANCE

### Incentives

The Health Information Technology for Economic and Clinical Health (HITECH) Act of the American Recovery and Reinvestment Act (ARRA) of 2009 created reimbursement incentives for U.S. healthcare organizations that are using EHRs in meaningful ways.<sup>1</sup> Long-term care facilities (as defined by the ARRA) are facility types excluded from the incentives including: skilled nursing homes, assisted living facilities, LTC hospitals, rehabilitation hospitals, and psychiatric hospitals. Unfortunately, there has been no clear communication regarding reasons why “ineligible providers” have been excluded from the incentives under the ARRA. This is despite a relatively large body of evidence showing that there is value in the use of EHR in long-term care settings where it not only improves resident care, but also increases communications between providers, consultants, hospital, and nursing home staff.<sup>2</sup> There is documentation that exists which alludes to Congress wanting to understand the extent to which ineligible providers work in settings which might receive EHR incentives under the ARRA.<sup>3</sup> However, it should be noted that eligible providers (physicians for instance) were able to assign their incentive funding to a facility of their choice (whether or not that facility was an eligible provider), but no evidence exists to the extent of this assignment in the literature or to whom.<sup>3</sup> This represents not only a potentially large amount of untrackable incentive funds under the ARRA, but also a source of statistical interference when “meaningful use” is assessed.

While facilities eligible for these incentives demonstrate EHR adoption rates of about 12%, ineligible facilities have adoption rates of only 2-4%.<sup>4</sup> Incentives and grants from the HITECH Act are clearly a major motivating factor for EHR adoption;<sup>5</sup> however, LTC facilities must bear the adoption costs on their own, which represents a significant barrier.<sup>5-15</sup>

### Identification and definition of key terms

The American College of Hospital Executives (ACHE) defines long-term care as “a continuum of medical and social services designed to support the needs of people living with chronic health problems that affect their ability to perform everyday activities.” Long-term care spans a continuum of “traditional medical services, social services, and housing”. Services in long-term care have a significantly different aim than traditional acute care services. While acute-care services aim to restore the patient to health, long-term care “aims to prevent deterioration and promote social adjustment to stages of decline” and it is delivered through a wide range of care givers and environments both in a healthcare facility and at home.<sup>16</sup> A large majority (92%) of long-term care facilities are privately owned and operated. The aging of the population creates an ever-increasing shortage of LTC beds per 1000 people 65 and over. Estimates show this trend will continue until the year 2030 with the percentage of persons 65 or over ballooning to 19% of the population.<sup>17</sup> The broad definition from the ACHE could encompass a wider range than necessary for the purposes of this research. The research question we posited would only be appropriate for health care organizations that would have a use for the EHR. While we think that an EHR would be beneficial at all levels of care to compensate for the lack of a provider of continuity between levels of care, we also look pragmatically at the cost versus the benefit. Because funding for an EHR would come from each independent health care organization in the U.S., an assisted-living facility in the U.S. would not have a significant need for an EHR that manages a patient’s entire continuum of care; the facility may only need to manage something as small as medication or diet, which would not justify the millions of dollars to implement an EHR solution. Those with the greatest need for an EHR would be those that manage the chronic conditions like a nursing home, or Skilled Nursing Facility.

1  
2  
3  
4  
5  
6  
7  
8  
9  
10  
11  
12  
13  
14  
15  
16  
17  
18  
19  
20  
21  
22  
23  
24  
25  
26  
27  
28  
29  
30  
31  
32  
33  
34  
35  
36  
37  
38  
39  
40  
41  
42  
43  
44  
45  
46  
47  
48  
49  
50  
51  
52  
53  
54  
55  
56  
57  
58  
59  
60

The taxonomy for the Electronic Health Record widely varies: digital medical record, computerized patient record, electronic medical record, digital medical record, etc. For the purposes of this study, the term EHR will be used exclusively to speak to the longitudinal and interoperable capabilities of an electronic medical record. This practice is supported by the World Health Organization (WHO).<sup>18</sup> The inherent advantages of the EHR are that it can enable any certified, credentialed provider to access any patient record from any health care organization, but the provider will only have access to the information necessary for the immediate incident of care. The EHR enables providers to see past history, allergies, and treatment regimens with trend analysis.<sup>19</sup>

In 2009, the US Government passed the American Recover and Reinvestment Act (ARRA), which included a significant section for healthcare intended to incentivize the adoption of the EHR. This section was called: Health Information Technology for Economic and Clinical Health (HITECH) Act.<sup>1</sup> The three phases of Meaningful Use consume IT strategies because of the HITECH Act's timeline for healthcare organizations to qualify for monetary incentives. Unfortunately, long-term care facilities were not included in these incentives.

### **EHR adoption among facilities**

Long-term care facilities that have adopted EHRs experience improvements in quality of care, documentation access, billing and reimbursement, and employee satisfaction and retention rates.<sup>5-15,20</sup> Interoperable EHRs may be especially useful to LTC facilities during periods of transitional care, when coordination and communication with other healthcare organizations is critical to achieving the best health outcomes.<sup>21</sup> Electronic health records are becoming more important for LTC facilities because increased demand for services from aging baby-boomers is inevitable.<sup>22</sup> While eligible organizations have the benefit of incentives to mitigate some costs in

1  
2  
3 attaining these benefits, LTC facilities must bear the full cost. There is a dearth of research  
4  
5 available to help decision-makers at LTC facilities make objective conclusions about adopting  
6  
7 EHRs, which is why this review is critical to future research.  
8  
9

### 10 **EHR impact**

11  
12 It is important to identify the factors that influence EHR adoption in LTC facilities that  
13  
14 are not dependent on HITECH incentive payments. This study's focus is to identify what those  
15  
16 adoption factors are, as well as discern the multitude of barriers those facilities face. While it is  
17  
18 clear that implementing an EHR system could bring many benefits to organizations, realizing  
19  
20 those benefits in the beginning stages might not be possible for every LTC facility.  
21  
22  
23

### 24 **Objectives**

25  
26  
27 The findings of this review will be useful to LTC facility administrators interested in  
28  
29 adopting EHRs into their organization by helping them identify barriers to overcome and  
30  
31 opportunities to lever. Policymakers may also find the identified factors useful when attempting  
32  
33 to increase EHR adoption in the long-term care industry. Additionally, vendors can benefit from  
34  
35 this article's information to design EHRs that are more useful for LTC facilities.  
36  
37  
38

### 39 **METHODS**

#### 40 **Data**

41  
42  
43 Data for this review were gathered using three separate databases: Google Scholar,  
44  
45 Cumulative Index of Nursing and Allied Health Literature (CINAHL) Complete via EBSCO  
46  
47 Host, and PubMed (which queries MEDLINE). Search criteria focused on EHR adoption in  
48  
49 long-term care. The authors independently reviewed the articles identified during the search and  
50  
51 independently summarized findings germane to this review . Following independent reviews,  
52  
53 authors compared and discussed the articles and reason for inclusion in the study. Articles were  
54  
55  
56  
57  
58  
59  
60

1  
2  
3 only included if selected by at least two reviewers. The comparable search criteria demonstrated  
4  
5 the authors had a similar understanding of the research problem.  
6  
7

## 8 9 **Sample**

10  
11 Research databases were queried using terms from the Medical Subject Headings  
12 (MeSH) at the National Center for Biotechnology Information (NCBI). Although multiple terms  
13 appeared for the EHR, the only heading listed in MeSH for LTC was “long-term care.” Several  
14  
15 exclusion criteria were also specified: The authors began with broad database searches then  
16  
17 narrowed the criteria to identify the most commonly mentioned factors listed in the articles. This  
18  
19 method avoids excluding relevant data by too narrowly defining initial search criteria. Searches  
20  
21 were limited to peer-reviewed journal articles in U.S.-based English language from 2009-2014 (n  
22  
23 = 16). This process is illustrated by Figure 1.  
24  
25  
26  
27  
28  
29

30  
31 Figure 1. An illustration of the literature review process  
32  
33

34  
35 Searches continued until the results reached saturation by repeating information about costs,  
36  
37 perceptions, and implementation.  
38

## 39 **RESULTS**

### 40 41 **Table of findings**

42  
43 The findings were summarized and inserted into the facilitators and barriers table after  
44  
45 the authors chose articles to create the literature review. All duplicate articles were accounted for  
46  
47 and consolidated before the findings table was created. The authors then reanalyzed the articles  
48  
49 and identified the individual factors affecting EHR adoption in LTC facilities after the articles  
50  
51 reached information saturation. These factors were then compiled into a frequency table to aid in  
52  
53 the analysis. An objective assessment of study bias was not conducted in this review. Results are  
54  
55  
56  
57  
58  
59  
60

1  
2  
3 summarized in Table 1. An expanded version of this table is provided as a supplementary file. It  
4  
5 augments the information below with the title of each study, and study characteristics such as the  
6  
7 study design, and data sources.  
8  
9

10  
11 Table 1. Summarized facilitators and barriers identified in the literature  
12  
13

14  
15 An analysis of the articles in the systematic literature review revealed multiple facilitators  
16  
17 and barriers to adopting an EHR. The review's focus was on LTC facility facilitators and  
18  
19 barriers. The facilitators to adoption included ease of access to information, error reduction,  
20  
21 long-run cost savings, efficiency, and information security. The barriers to adaptation included  
22  
23 increasing costs, users' negative perception, cultural changes, lack of proper training, and lack of  
24  
25 implementation proper planning.  
26  
27  
28

### 29 30 **Facilitators** 31 32

33 The determined facilitators associated with EHR adoption were: access and transfer of  
34  
35 information, long-run cost savings, error reduction, clinical and administrative efficiency, project  
36  
37 planning, security, user perceptions, facility characteristics, health outcomes, time savings, and  
38  
39 staff retention. The facilitators also have narrowed subsections throughout the articles. The  
40  
41 benefits LTC facilities faced after adopting EHRs are connected to the facilitators. For example,  
42  
43 facilities realized an ability to get to patient records quickly and easily, which is related to access  
44  
45 and transfer of information.<sup>7,8,15</sup> Cost savings looked at the long-run facility savings and how an  
46  
47 EHR is an investment with benefits that take time to realize.<sup>23,24</sup> Error reduction was another  
48  
49 benefit of using EHRs, expressed as fewer prescription errors, more patient medication and  
50  
51 allergy alerts, and more overall health safeguards.<sup>8,9,20</sup> Efficiency enabled rapid information  
52  
53  
54  
55  
56  
57  
58  
59  
60



1  
2  
3 exchange through administrative channels, improved productivity and consistency, and better  
4  
5 communication between clinical and administrative departments.<sup>9-11,15,20</sup>  
6  
7

## 8 9 **Barriers**

10  
11 The barriers varied in topic specification. The broad categories determined from the  
12 literature review were: cost savings, user perception, implementation issues, external factors,  
13  
14 training, facility characteristics, cultural change, project planning, security, staff retention, and  
15  
16 system issues. Each broader category has sub-issues that LTC facilities face during EHR  
17  
18 adoption.  
19  
20  
21  
22

23  
24 Of the sub-issues, cost barriers were a consistent concern because adopting and  
25  
26 implementing an EHR requires a substantial initial investment. Other cost concerns stem from  
27  
28 the lack of funding for LTC facilities, future upgrades, and maintenance that will be necessary to  
29  
30 successfully use the EHR.<sup>8,13</sup>  
31  
32  
33

34  
35 User perception barriers included issues with professional and public acceptance of the  
36  
37 new system as well as functionality problems.<sup>8-10</sup> Implementation barriers were lack of complete  
38  
39 understanding from the staff, too little training during and after implementation, and lack of time  
40  
41 for implementation and understanding.<sup>5,6,14,20</sup> The external factors that present implementation  
42  
43 problems were employee recruitment, lack of industry standards, facility location, and impact on  
44  
45 the population.<sup>5,14,15</sup> These facilitators and barriers are summarized in Table 2.  
46  
47  
48

49 Table 2. Factors identified in the literature  
50  
51  
52  
53  
54  
55  
56  
57  
58  
59  
60

## DISCUSSION

Many factors determine the adoption of EHR technology in LTC facilities. The authors found the cost, perceptions, and implementation process as the most significant factors that affect EHR adoption by LTC facilities. By considering these factors and the degree to which a facility can manipulate them, it may be possible to increase EHR use among LTC facilities to create better outcomes, reduce costs, and increase coordination of care.

### Population

The rapid increase in long-term care residency exemplifies the need for facilities to be efficient, coordinated, and have good patient outcomes. Quality measures would increase if EHRs were more prevalent in LTC facilities, but vendors' main focus is creating acute care EHRs;<sup>10,21</sup> which make current EHRs impractical for most LTC facilities.<sup>10,11,23</sup> The adoption rate could increase if there were standardization in the EHR market,<sup>10</sup> which would make systems easier to use across different facilities.

Vendors would benefit from connecting with long-term care leaders to understand how EHRs fit long-term care strategic planning. A useful EHR helps LTC facilities improve quality, reduce errors, aids with billing and reimbursement, increases employee satisfaction, and may also increase employee retention.<sup>6,8,13</sup> Long-term care facilities need EHRs that are interoperable with other hospital systems so transfers and coordination of care become easier and have less errors. Vendors would benefit from understanding how LTC facilities use EHRs and how to make them more compatible for long-term care needs.

### Cost

The cost of implementing the EHR was the most prevalent barrier. Many facilities may reject acquiring or installing an EHR because the initial cost is so high<sup>5-15</sup> and maintaining and

1  
2  
3 upgrading the EHR may also be too costly.<sup>10,13,20</sup> Lack of initial capital could inhibit the first step  
4  
5 of considering adopting an EHR. There was a general theme that if LTC facilities had funding,  
6  
7 they could become meaningful EHR users more quickly. While cost is a barrier, it is important to  
8  
9 point out that many studies stressed the need for LTC facilities to be coordinated with acute care  
10  
11 hospitals to run more efficiently and productively. Finding the money required to execute an  
12  
13 EHR is critical to LTC facilities gaining the information it needs to make improved clinical  
14  
15 decisions.  
16  
17  
18

19  
20 Cost was a running topic among many studies because the HITECH Act's meaningful  
21  
22 use incentives do not include LTC facilities. Long-term care facilities lack the ability to  
23  
24 participate the HITECH incentive program, yet there is a gap in research that explores different  
25  
26 funding alternatives for long-term care.  
27  
28

### 29 **Perceptions**

30  
31 Another major factor that determines if an EHR will be adopted by a LTC facility is the  
32  
33 administrative and clinical user perceptions.<sup>5,8,10,13-15,20,25</sup> Perception can manifest as something  
34  
35 that can hinder or help EHR adoption at LTC facilities. Rejecting an EHR may be due to a lack  
36  
37 of understanding about the user benefits,<sup>8</sup> which might be connected to fear of change.<sup>13</sup> The  
38  
39 perception that an EHR system will simply not be useful could also be a result of marketing  
40  
41 shortfalls on the part of EHR vendors. Lack of usefulness may also result from not effectively  
42  
43 implementing the system and failing to achieve expected benefits. However, concerns that the  
44  
45 system will be difficult to use can be addressed by selecting a system with a focus on user  
46  
47 interfaces. Furthermore, misunderstanding EHR benefits may lead to a perception that using this  
48  
49 technology will reduce the amount of time physicians and nurses spend with residents.<sup>15,20,25</sup> A  
50  
51  
52  
53  
54  
55  
56  
57  
58  
59  
60

1  
2  
3 surprising finding was that the negative impact providers perceived was due to a lack of  
4  
5 training.<sup>6,14,15</sup>  
6  
7

8 Training helps change negative perceptions and increases the likelihood of adopting an  
9  
10 EHR; a theme among some articles was that initial, follow-up, and ongoing training is the best  
11  
12 method to ensure broad EHR acceptance.<sup>8,14,15</sup> Training could also help people who lack general  
13  
14 computer skills, documentation skills, and people who may find the systems difficult to  
15  
16 navigate.<sup>25</sup> Having the funds to conduct proper training will determine whether users can learn to  
17  
18 accept the new system, which further stresses the need for funding.  
19  
20

21  
22 Administrators' perceptions about the changing regulatory and competitive long-term  
23  
24 care environment may present some EHR adoption opportunities. Reasons facilities chose to  
25  
26 adopt an EHR include anticipation about increases in the regulatory environment and changes to  
27  
28 reimbursement.<sup>4,13</sup> Some nursing home administrators feared increased regulations in the  
29  
30 industry, and this prompted EHR adoption to prepare for a possible mandate.<sup>13</sup> Others chose to  
31  
32 adopt EHRs due to emerging payment methods, such as bundled payments, which require better  
33  
34 coordination of care with outside entities to receive higher reimbursements.<sup>4</sup> The competitive  
35  
36 long-term care environment steered some organizations to adopt EHRs to emulate competitors'  
37  
38 EHR success.<sup>13</sup> The competitive advantage of EHRs should be explained to decision-makers so  
39  
40 they can confidently adopt the systems. Additionally, policymakers must offer incentives along  
41  
42 with the increases in regulations and changes in reimbursement; unfunded mandates would  
43  
44 degrade EHR perceptions in long-term care.  
45  
46  
47  
48  
49

## 50 **Implementation**

51  
52 Adopting an EHR relies heavily on the execution of the implementation process. Many  
53  
54 studies pointed to having a strategic plan that accounts for the size, governance, costs, facility  
55  
56  
57  
58  
59  
60

1  
2  
3 needs, and regulatory requirements of the internal and external environments.<sup>8,10,13,14</sup> Also  
4  
5 significant is having the right people to implement the system; this should include a committee,  
6  
7 strong leadership, trainers, and the right vendor. Creating a successful implementation plan could  
8  
9 make or break the EHR project. Some facilities found not having long-term care industry  
10  
11 standards was a barrier to adoption because they did not have a benchmark to use for an  
12  
13 implementation plan.<sup>6,14</sup> This finding's implication is a need to involve interest groups to create  
14  
15 industry standards to help LTC facilities adopt EHRs in the future.  
16  
17  
18

### 19 20 **Facilitators**

21  
22 Long-term care facilities may begin to realize the on-going benefits of EHR adoption  
23  
24 after an organization weighs the EHR adoption barriers, determines whether it aligns with the  
25  
26 strategic plan, and decides to make the steps to implementation. The facilitator's overarching  
27  
28 theme was an ultimate increase in efficiency for the entire organization. This finding is  
29  
30 interesting because the path to implementing an EHR can disrupt business in the beginning  
31  
32 stages by taking time to train employees, integrate information, as well as cost the facility ample  
33  
34 money. If decision-makers prioritize EHR adoption with an implementation plan, then the  
35  
36 organization is more likely to realize facilitators like cost savings, better transfer of information,  
37  
38 and error reduction.  
39  
40  
41  
42

43  
44 Decision-makers should recognize the EHR facilitators, find ways to overcome the initial  
45  
46 costs, and rely on research that indicates recognizable savings of successful system  
47  
48 implementation. As with all decisions, there are costs and benefits to LTC facilities widely  
49  
50 adopting EHRs, but the research suggests EHRs may soon be heavily utilized, and adopting one  
51  
52 now could help prepare staff and residents for this inevitable change.  
53  
54  
55  
56  
57  
58  
59  
60

## Limitations

This paper provides a review of current and comprehensive data about EHR adoption factors for LTC facilities, and will help those facilities understand the costs and benefits of adopting an EHR system.

This study generalized all LTC facilities together, which bolsters the study's external validity because many of the articles also conducted research this way. Long-term care facilities can be lumped together because they all lack HITECH incentives. The differences between the facilities are size, location, and reimbursement structure. The authors found different facilities adopted EHRs at various rates, but the difference was not relevant to this study's results because all LTC facilities have similar obstacles to adoption.

The lack of evidence written about EHR adoption among LTC facilities and the search database limits led to the exhaustive nature of adoption factors of the study. This study was limited to only current research, which helped create a comparison for LTC facilities that want to implement an EHR in today's environment.

## Conclusions

It is important to examine factors affecting EHR adoption in LTC facilities because those facilities do not receive HITECH incentives. This study identified numerous facilitating factors and barriers through a systematic review of current articles in three scholarly databases. This information can be useful for decision-makers attempting successful EHR adoption in their LTC facility, policymakers trying to increase adoption rates without expanding incentives, and vendors who wish to create EHRs that coordinate with long-term care.

## ACKNOWLEDGEMENTS & STATEMENT OF CONTRIBUTION

Authors provided equal contribution to the final product. The topic originated as directed research for a class for a Masters in Health Administration. The research was intended as both instructional on the topic and on writing for journals for publication. Dr.s Kruse and Mileski provided guidance, advice, and independent analysis to validate that of the graduate students.

## COMPETING INTERESTS

Conflicts of interest: None declared

## FUNDING

This research received no specific grant from any funding agency in the public, commercial or not-for-profit sectors'

## MISCELENEOUS DECLARATION

There were neither humans nor animals used as subjects of this research. In accordance with 45CFR46, this research qualifies as IRB Exempt.

## DATA SHARING STATEMENT

There was no sharing of data. All research used was original. This research was originally submitted to the U.S. Journal of American Medical Informatics Association, but it was rejected. The review was rewritten based on input from reviewers from JAMIA. No portion of this research is currently with another publisher, nor has any of the research been published.

## FIGURE LEGEND

Figure 1: Illustration of the manuscript-selection process for the review

**REFERENCES**

1. Health Information Technology for Economic and Clinical Health Act, 42 U.S.C. § 201 2009.  
URL:  
[http://www.healthit.gov/sites/default/files/hitech\\_act\\_excerpt\\_from\\_arra\\_with\\_index.pdf](http://www.healthit.gov/sites/default/files/hitech_act_excerpt_from_arra_with_index.pdf)  
[accessed 3/18/2014] WebCite URL: <http://www.webcitation.org/6OApfh2QK>
2. Brandeis GH, Hogan M, Murphy M, Murray S. (2007). Electronic health record implementation in community nursing homes. *Journal of the American Medical Directors Association*, 8(1), 31-34.
3. Assistant Secretary for Planning and Evaluation. EHR Payment Incentives for Providers Ineligible for Payment Incentives and Other Funding Study. URL:  
<http://aspe.hhs.gov/daltcp/reports/2013/EHRPIap.shtml#appendD> [Accessed 9/9/2014]
4. Wolf L, Harvell J, Jha AK. Hospitals Ineligible For Federal Meaningful-Use Incentives Have Dismally Low Rates Of Adoption Of Electronic Health Records. *Health Aff*, 2012;31(3), 505–513. doi:10.1377/hlthaff.2011.0351 PMID: 22392661
5. Wang T, Biedermann S. Adoption and Utilization of Electronic Health Record Systems by Long-Term Care Facilities in Texas. *Perspectives in Health Information Management*, 2012;1–14. PMID: 22737099
6. Resnick HE, et al. "Use of electronic information systems in nursing homes: United States, 2004." *Journal of the American Medical Informatics Association* 16.2 (2009): 179-186.
7. Davidson J. Electronic medical records: what they are and how they will revolutionize the delivery of resident care... first of a two-part series. *Canadian Nursing Home* [serial online]. September 2009;20(3):15-16. Available from: CINAHL Complete, Ipswich, MA. Accessed July 9, 2014. ISSN: 0847-5520



- 1  
2  
3 8. Hamid F, Cline T. Providers' Acceptance Factors and their Perceived Barriers to Electronic  
4 Health Record (EHR) Adoption. *Online Journal Of Nursing Informatics* [serial online].  
5  
6 September 2013;17(3):1-11. Available from: CINAHL Complete, Ipswich, MA. Accessed  
7  
8 July 10, 2014. Permalink  
9  
10 [http://libproxy.txstate.edu/login?url=http://search.ebscohost.com/login.aspx?direct=true&db=](http://libproxy.txstate.edu/login?url=http://search.ebscohost.com/login.aspx?direct=true&db=ccm&AN=2012367240&site=ehost-live)  
11  
12 [http://libproxy.txstate.edu/login?url=http://search.ebscohost.com/login.aspx?direct=true&db=](http://libproxy.txstate.edu/login?url=http://search.ebscohost.com/login.aspx?direct=true&db=ccm&AN=2012367240&site=ehost-live)  
13 [ccm&AN=2012367240&site=ehost-live](http://libproxy.txstate.edu/login?url=http://search.ebscohost.com/login.aspx?direct=true&db=ccm&AN=2012367240&site=ehost-live)  
14  
15
- 16  
17 9. Alexander GL, Madsen R. IT sophistication and quality measures in nursing homes. *Journal of*  
18  
19 *Gerontological Nursing* 2009;35(7): 22.  
20  
21
- 22 10. Phillips K, Wheeler C, Campbell J, et al. Electronic medical records in long-term care.  
23  
24 *Journal of Hospital Marketing & Public Relations*, 2010;20(2), 131–142.  
25  
26 doi:10.1080/15390942.2010.493377 PMID: 20582852  
27  
28
- 29 11. Wilkins M. Factors influencing acceptance of electronic health records in hospitals.  
30  
31 *Perspectives in Health Information Management*, 2009;6, 18p. PMID: 20169018  
32  
33
- 34 12. Filipova AA. Electronic Health Records Use and Barriers and Benefits to Use in Skilled  
35  
36 *Nursing Facilities: CIN: Computers, Informatics, Nursing*, 2013;31(7), 305–318.  
37  
38 doi:10.1097/NXN.0b013e318295e40e PMID: 23774447  
39  
40
- 41 13. Bezboruah KC, Hamann, DJ, Smith JD. Management attitudes and technology adoption in  
42  
43 long-term care facilities. *Journal of Health Organization and Management*, 2014;28(3), 4–4.  
44  
45
- 46 14. Cherry B. Assessing Organizational Readiness for Electronic Health Record Adoption in  
47  
48 Long-Term Care Facilities. *Journal of Gerontological Nursing*, 2011;37(10), 14–19.  
49  
50 doi:<http://dx.doi.org/10.3928/00989134-20110831-06>  
51  
52
- 53 15. Grabenbauer L, Skinner A, Windle J. Electronic Health Record Adoption - Maybe It's not  
54  
55 about the Money: Physician Super-Users, Electronic Health Records and Patient Care.  
56  
57  
58  
59  
60

- 1  
2  
3 *Applied Clinical Informatics*, 2011;2(4), 460–471. doi:10.4338/ACI-2011-05-RA-0033  
4  
5  
6 PMID: 23616888  
7
- 8 16. McCall N. Long-term care: Definition, demand, cost, and financing. URL:  
9  
10 <http://www.ache.org/PUBS/1mccall.pdf>, Webcitation:  
11  
12 <http://www.webcitation.org/6SKzjPXV1>  
13  
14
- 15 17. Association on aging. URL: [http://www.aoa.gov/Aging\\_Statistics/](http://www.aoa.gov/Aging_Statistics/) [accessed 9/4/2014]  
16  
17 Webcitation: <http://www.webcitation.org/6SL0f14rt>  
18  
19
- 20 18. Institute of Medicine, Key capabilities of an electronic health record, Institute of Medicine  
21  
22 2003 Jul. URL [http://www.iom.edu/Reports/2003/Key-Capabilities-of-an-Electronic-Health-](http://www.iom.edu/Reports/2003/Key-Capabilities-of-an-Electronic-Health-Record-System.aspx)  
23  
24 [Record-System.aspx](http://www.iom.edu/Reports/2003/Key-Capabilities-of-an-Electronic-Health-Record-System.aspx) [accessed 9/4/2014] WebCite URL:  
25  
26 <http://www.webcitation.org/6ODtL6HKG>  
27  
28
- 29 19. U.S. Health and Human Services. Learn EHR Basics. URL:  
30  
31 <http://www.healthit.gov/providers-professionals/learn-ehr-basics> [accessed 9/4/2014]  
32  
33 Webcitation: <http://www.webcitation.org/6SL21pUQO>  
34  
35
- 36 20. Cherry B, Ford E, Peterson L. Experiences with electronic health records: Early adopters in  
37  
38 long-term care facilities. *Health Care Management Review July/September 2011*; 36(3), 265–  
39  
40 274. doi:10.1097/HMR.0b013e31820e110f PMID: 21646885  
41  
42
- 43 21. Tripp JS, Narus SP, Magill MK, et al. Evaluating the accuracy of existing EMR data as  
44  
45 predictors of follow-up providers. *Journal of the American Medical Informatics Association*,  
46  
47 2008;15(6), 787-790. DOI: 10.1197/jamia.M2753 PMID: 18755996  
48  
49
- 50 22. Robison J, Shugrue N, Fortinsky RH, et al. (2013). Long-Term Supports and Services  
51  
52 Planning for the Future: Implications From a Statewide Survey of Baby Boomers and Older  
53  
54 Adults. *The Gerontologist*, gnt094. doi: 10.1093/geront/gnt094 PMID: 23990621  
55  
56  
57  
58  
59  
60

- 1  
2  
3  
4  
5  
6  
7  
8  
9  
10  
11  
12  
13  
14  
15  
16  
17  
18  
19  
20  
21  
22  
23  
24  
25  
26  
27  
28  
29  
30  
31  
32  
33  
34  
35  
36  
37  
38  
39  
40  
41  
42  
43  
44  
45  
46  
47  
48  
49  
50  
51  
52  
53  
54  
55  
56  
57  
58  
59  
60
23. Tabar P. Why EHRs matter to LTC's future. *Long-Term Living: For the Continuing Care Professional*, 2013;62(1), 14–16.
  24. Vendor Group Develops EHR Code of Conduct. (2013). *Journal of AHIMA*, 84(8), 12–13.
  25. Yu P, Zhang Y, Gong Y, et al. Unintended adverse consequences of introducing electronic health records in residential aged care homes. *International Journal of Medical Informatics*, 2013;82(9), 772–788. doi:10.1016/j.ijmedinf.2013.05.008 PMID: 23770027
  26. Hamann DJ, Bezboruah KC. Utilization of Technology by Long-Term Care Providers Comparisons Between For-Profit and Nonprofit Institutions. *Journal of Aging and Health*, 2013;25(4), 535–554. doi:10.1177/0898264313480238 PMID: 23509114
  27. Vest JR, Yoon J, Bossak BH. Changes to the electronic health records market in light of health information technology certification and meaningful use. *Journal Of The American Medical Informatics Association: JAMIA*, 2013;20(2), 227–232. doi:10.1136/amiajnl-2011-000769 PMID: 22917839
  28. Goodman C. Savings in electronic medical record systems? Do it for the quality. *Health Affairs*, 2005;24(5), 1124–1126. PMID: 16162554
  29. Gruber N, Darragh J, Puccia P, et al. Embracing change to improve performance: implementation of an electronic health record system. *Long-Term Living: For the Continuing Care Professional*, 2010;59(1), 28–31.
  30. Holup AA, Dobbs D, Temple A, et al. Going Digital Adoption of Electronic Health Records in Assisted Living Facilities. *Journal of Applied Gerontology*, 2014;33(4), 494–504. doi:10.1177/0733464812454009 PMID: 24781968
  31. Holup AA, Dobbs D, Meng H, et al. Facility characteristics associated with the use of electronic health records in residential care facilities. *Journal of the American Medical*

1  
2  
3 *Informatics Association*, 2013;20(4), 787–791. doi:10.1136/amiajnl-2012-001564 PMID:  
4  
5 23645538  
6

- 7  
8 32. Ford EW, Menachemi N, Peterson LT, et al. Resistance Is Futile: But It Is Slowing the Pace  
9  
10 of EHR Adoption Nonetheless. *Journal of the American Medical Informatics Association* :  
11  
12 *JAMIA*, 2009;16(3), 274–281. doi:10.1197/jamia.M3042 PMID: 19261931  
13  
14  
15  
16  
17  
18  
19  
20  
21  
22  
23  
24  
25  
26  
27  
28  
29  
30  
31  
32  
33  
34  
35  
36  
37  
38  
39  
40  
41  
42  
43  
44  
45  
46  
47  
48  
49  
50  
51  
52  
53  
54  
55  
56  
57  
58  
59  
60

Table 1: Results from the review of the literature.

| Authors                                                         | Facilitators                                                                                                                                                                                                                                      | Barriers                                                                                                                                                                                                                                |
|-----------------------------------------------------------------|---------------------------------------------------------------------------------------------------------------------------------------------------------------------------------------------------------------------------------------------------|-----------------------------------------------------------------------------------------------------------------------------------------------------------------------------------------------------------------------------------------|
| Wolf L, Harvell J, Jha AK. (2012). <sup>4</sup>                 | <ul style="list-style-type: none"> <li>Emerging payment methods could encourage EHR adoption.</li> <li>“Quality Improvement Organizations” may increase adoption because they provide technical support that many LTC facilities need.</li> </ul> | <ul style="list-style-type: none"> <li>HITECH incentives only focus on acute care and primary physicians.</li> <li>Expanding the incentives to LTC facilities may be too costly.</li> </ul>                                             |
| Wang T, Biedermann S. (2012). <sup>5</sup>                      | <ul style="list-style-type: none"> <li>Anticipating state and federal requirements.</li> <li>Good communication between vendors and LTC facilities.</li> <li>Education and training programs.</li> </ul>                                          | <ul style="list-style-type: none"> <li>Lack of initial investment resources.</li> <li>No technical infrastructure.</li> <li>Not enough time to implement the EHR.</li> <li>Lack of space for the new system.</li> </ul>                 |
| Resnick H, et al. (2009). <sup>6</sup>                          | <ul style="list-style-type: none"> <li>Error reduction.</li> <li>Quality.</li> <li>Efficiency.</li> <li>Better health outcomes.</li> </ul>                                                                                                        | <ul style="list-style-type: none"> <li>Cost.</li> <li>Complex systems (implementation).</li> <li>No standards (external).</li> </ul>                                                                                                    |
| Davidson J. (2009). <sup>7</sup>                                | <ul style="list-style-type: none"> <li>Comprehensive implementation planning.</li> <li>Governmental initiatives.</li> <li>Management and staff support.</li> <li>.</li> </ul>                                                                     | <ul style="list-style-type: none"> <li>Cost.</li> <li>Privacy issues.</li> <li>Incorrect vendor.</li> </ul>                                                                                                                             |
| Hamid F, Cline TW. (2013). <sup>8</sup>                         | <ul style="list-style-type: none"> <li>EHR satisfaction increases when the users understand the benefits.</li> <li>Supportive management.</li> <li>Training programs.</li> </ul>                                                                  | <ul style="list-style-type: none"> <li>Cost.</li> <li>Perceived lack of usefulness.</li> <li>Time consuming.</li> </ul>                                                                                                                 |
| Alexander G, Madsen R. (2009). <sup>9</sup>                     | <ul style="list-style-type: none"> <li>Improve clinical decision making.</li> <li>Earlier intervention.</li> <li>Time savings.</li> </ul>                                                                                                         | <ul style="list-style-type: none"> <li>IT sophistication negatively correlated with detection of detection of incontinence (implementation issue?)</li> </ul>                                                                           |
| Phillips K, Wheeler C, Campbell J, et al. (2010). <sup>10</sup> | <ul style="list-style-type: none"> <li>Government financial incentives.</li> <li>Reduced errors and adverse drug events.</li> <li>Including users in the design and implementation process.</li> </ul>                                            | <ul style="list-style-type: none"> <li>Adoption costs.</li> <li>Efficiency outcomes were inconsistent.</li> <li>Incongruent cost savings.</li> <li>Lack of interoperability.</li> <li>Fear of changing the facility culture.</li> </ul> |
| Wilkins M. (2009). <sup>11</sup>                                | <ul style="list-style-type: none"> <li>Training and learning the system increases adoption.</li> <li>Understanding the usefulness of the EHR technology.</li> </ul>                                                                               | <ul style="list-style-type: none"> <li>Facility size.</li> <li>Lack of change agents or leaders in the facility.</li> <li>Lack of interoperability.</li> <li>Cost.</li> <li>Resistance to change.</li> </ul>                            |
| Filipova AA.                                                    | <ul style="list-style-type: none"> <li>Federal and state government</li> </ul>                                                                                                                                                                    | <ul style="list-style-type: none"> <li>Financial barriers like no</li> </ul>                                                                                                                                                            |

| Authors                                                   | Facilitators                                                                                                                                                                                                                                                                                                                                                       | Barriers                                                                                                                                                                                                                                                                         |
|-----------------------------------------------------------|--------------------------------------------------------------------------------------------------------------------------------------------------------------------------------------------------------------------------------------------------------------------------------------------------------------------------------------------------------------------|----------------------------------------------------------------------------------------------------------------------------------------------------------------------------------------------------------------------------------------------------------------------------------|
| (2013). <sup>12</sup>                                     | <p>incentives or policy initiatives could offset financial barriers.</p> <ul style="list-style-type: none"> <li>Aligning organizational strategic plans could also encourage adoption.</li> </ul>                                                                                                                                                                  | <p>capital to implement an EHR and the cost of hardware and infrastructure.</p> <ul style="list-style-type: none"> <li>Organizational barriers.</li> <li>Legal and regulatory barriers.</li> <li>Technological barriers.</li> <li>Network barriers.</li> </ul>                   |
| Bezboruah KC, Hamann, DJ, Smith JD. (2014). <sup>13</sup> | <ul style="list-style-type: none"> <li>Institutional pressure like anticipated regulations and competition pressures increase EHR adoption.</li> </ul>                                                                                                                                                                                                             | <ul style="list-style-type: none"> <li>Cost of the electronic system and projected upgrades.</li> <li>Leaders perceiving staff's resistance to change.</li> <li>Misunderstanding how EHRs could be useful or not having enough information to chose the right system.</li> </ul> |
| Cherry B. (2011). <sup>14</sup>                           | <ul style="list-style-type: none"> <li>Fast-growing elder populations mean quality of care in LTC facilities must be addressed with EHRs.</li> <li>A strong implementation plan within the facility that aligns with strategic plans.</li> <li>Initial and follow-up training programs.</li> <li>A perception shift about the benefits of EHR adoption.</li> </ul> | <ul style="list-style-type: none"> <li>Cost and a lack of capital resources.</li> <li>Lack of industry standards.</li> <li>Complicated implementation processes.</li> <li>Lack of technical support.</li> <li>Not enough evidence to support EHR's proposed benefits.</li> </ul> |
| Grabenbauer L, Skinner A, Windle J. (2011). <sup>15</sup> | <ul style="list-style-type: none"> <li>Improved communication.</li> <li>Patient data access and sharing.</li> </ul>                                                                                                                                                                                                                                                | <ul style="list-style-type: none"> <li>Cost.</li> <li>Reduced time with patients.</li> <li>Currently EHRs do not impact population health.</li> </ul>                                                                                                                            |
| Cherry B, Ford E, Peterson L. (2011). <sup>20</sup>       | <ul style="list-style-type: none"> <li>Rapid patient record retrieval.</li> <li>Better document consistency, quality, and accuracy.</li> <li>Improvements in employee satisfaction and retention.</li> <li>Better patient assessments, oversight, and order processing.</li> <li>Better time management.</li> </ul>                                                | <ul style="list-style-type: none"> <li>Technology and maintenance problems like downtime or learning the new system.</li> <li>Residents thought providers were more focused on the computers than on them.</li> </ul>                                                            |
| Tabar P. (2013). <sup>23</sup>                            | <ul style="list-style-type: none"> <li>Perceptions are changing in long-term care; EHRs are becoming a cost of doing business.</li> </ul>                                                                                                                                                                                                                          | <ul style="list-style-type: none"> <li>Most EHRs were built for acute care and LTC facilities had trouble finding a system that met the organization's needs.</li> </ul>                                                                                                         |
| <i>Vendor Group Develops EHR</i>                          | <ul style="list-style-type: none"> <li>Cost reductions.</li> <li>Improve patient outcomes.</li> </ul>                                                                                                                                                                                                                                                              |                                                                                                                                                                                                                                                                                  |

| Authors                                                     | Facilitators                                                                                                                                                                                                                                                                                                                      | Barriers                                                                                                                                                                                                                                                                                                                                                        |
|-------------------------------------------------------------|-----------------------------------------------------------------------------------------------------------------------------------------------------------------------------------------------------------------------------------------------------------------------------------------------------------------------------------|-----------------------------------------------------------------------------------------------------------------------------------------------------------------------------------------------------------------------------------------------------------------------------------------------------------------------------------------------------------------|
| <i>Code of Conduct.</i> (2013). <sup>24</sup>               | <ul style="list-style-type: none"> <li>State programs could help fund a facility's EHR adoption.</li> </ul>                                                                                                                                                                                                                       |                                                                                                                                                                                                                                                                                                                                                                 |
| Yu P, Zhang Y, Gong Y, et al. (2013). <sup>25</sup>         | <ul style="list-style-type: none"> <li>Continuous training.</li> <li>Open dialogue with vendors.</li> <li>Balancing EHR accuracy with patient care.</li> <li>Facilities should have all paper or all electronic systems.</li> </ul>                                                                                               | <ul style="list-style-type: none"> <li>Staff resisted the new system because personal perceptions about their age, lack of documentation skills, or other reasons created limitations.</li> <li>Information management became too difficult and documents lacked consistency.</li> <li>Providers complained about spending less time with residents.</li> </ul> |
| Hamann DJ, Bezboruah KC. (2013). <sup>26</sup>              | <ul style="list-style-type: none"> <li>Nonprofit facilities were 40% more likely to adopt EHRs.</li> <li>Nonprofits have more regulations, so may need the benefits of EHRs.</li> </ul>                                                                                                                                           | <ul style="list-style-type: none"> <li>For-profit facilities lagged behind in EHR adoption rates.</li> <li>Fewer regulations enable for-profit facilities to invest in cost-effective endeavors and avoid the expense of EHR implementation.</li> </ul>                                                                                                         |
| Vest JR, Yoon J, Bossak BH. (2013). <sup>27</sup>           | <ul style="list-style-type: none"> <li>More EHR vendors.</li> <li>Trends show electronic record use is on the rise.</li> <li>Meaningful use makes EHRs more prevalent.</li> </ul>                                                                                                                                                 | <ul style="list-style-type: none"> <li>Lagging widespread EHR adoption.</li> <li>Misaligned incentives.</li> </ul>                                                                                                                                                                                                                                              |
| Weaver S. (2011). <sup>28</sup>                             | <ul style="list-style-type: none"> <li>Error reduction (quality).</li> <li>Improved efficiency.</li> <li>Consumer (user) perceptions</li> <li>Improved health outcomes</li> </ul>                                                                                                                                                 | <ul style="list-style-type: none"> <li>Difficulties transitioning from paper to EHR. (Implementation .)</li> <li>Training becomes paramount.</li> </ul>                                                                                                                                                                                                         |
| Gruber N, Darragh J, Puccia P, et al. (2010). <sup>29</sup> | <ul style="list-style-type: none"> <li>Strong implementation team.</li> <li>Train and prepare all users.</li> <li>Have ample space for training.</li> <li>Communicate often and thoroughly.</li> <li>Set goals, tasks, and schedules for the implementation.</li> <li>Reduced errors.</li> <li>Improved documentation.</li> </ul> | <ul style="list-style-type: none"> <li>Minor increases in operating expenses.</li> </ul>                                                                                                                                                                                                                                                                        |
| Holup AA, Dobbs D, Temple A, et al. (2014). <sup>30</sup>   | <ul style="list-style-type: none"> <li>Rapidly aging populations stresses the need to create interoperable, coordinated EHRs for LTC facilities.</li> </ul>                                                                                                                                                                       | <ul style="list-style-type: none"> <li>Long-term care EHRs are not as comprehensive as acute care EHRs.</li> </ul>                                                                                                                                                                                                                                              |
| Holup AA, Dobbs D, Meng H, et al. (2013). <sup>31</sup>     | <ul style="list-style-type: none"> <li>Created better health outcomes.</li> <li>Reduced extra costs.</li> <li>Improved delivery and quality.</li> </ul>                                                                                                                                                                           | <ul style="list-style-type: none"> <li>High initial investment means slower adoption in facilities that cannot afford</li> </ul>                                                                                                                                                                                                                                |

1  
2  
3  
4  
5  
6  
7  
8  
9  
10  
11  
12  
13  
14  
15  
16  
17  
18  
19  
20  
21  
22  
23  
24  
25  
26  
27  
28  
29  
30  
31  
32  
33  
34  
35  
36  
37  
38  
39  
40  
41  
42  
43  
44  
45  
46  
47  
48  
49  
50  
51  
52  
53  
54  
55  
56  
57  
58  
59  
60

| Authors | Facilitators                                                                                                                                                                 | Barriers                                                                                                                                                                                      |
|---------|------------------------------------------------------------------------------------------------------------------------------------------------------------------------------|-----------------------------------------------------------------------------------------------------------------------------------------------------------------------------------------------|
|         | <ul style="list-style-type: none"><li>• An increasing elder population makes implementing EHRs a necessity.</li><li>• Nonprofits were more likely to utilize EHRs.</li></ul> | <p>the EHR system, which slows the rate of becoming better integrated with acute care.</p> <ul style="list-style-type: none"><li>• Facility characteristics determine EHR adoption.</li></ul> |

For peer review only



Table 2: Affinity matrix identifying frequency of factors listed in the literature

| <b>Factors</b>                       | <b>Total Occurrences</b> |
|--------------------------------------|--------------------------|
| <b>Facilitators</b>                  |                          |
| Error Reduction                      | 7                        |
| Clinical & Administrative Efficiency | 7                        |
| Cost Savings                         | 6                        |
| Health Outcomes                      | 6                        |
| Access and Transfer to Information   | 5                        |
| Project Planning                     | 4                        |
| User Perceptions                     | 4                        |
| Security                             | 3                        |
| Facility Characteristics             | 3                        |
| Time Saving                          | 3                        |
| <b>Barriers</b>                      |                          |
| Cost                                 | 10                       |
| User Perceptions                     | 8                        |
| Implementation Issues                | 8                        |
| External Factors                     | 6                        |
| Training                             | 5                        |
| Facility Characteristics             | 4                        |
| Cultural Change                      | 2                        |
| Project Planning                     | 2                        |
| Security                             | 2                        |
| Staff Retention                      | 1                        |
| System Issues                        | 1                        |

## Adoption Factors Associated with Electronic Health Record among Long-Term Care Facilities – A Systematic Review

Clemens Scott Kruse<sup>1</sup>, Michael Mileski<sup>2</sup>, Vyachelslav Alaytsev<sup>3</sup>, Elizabeth Carol<sup>3</sup>, Ariana Williams<sup>3</sup>

1. MBA, MSIT, MHA, PhD, FACHE, CPHIMS, Assistant Professor, Texas State University, San Marcos TX, 78666 U.S.A.
2. DC, MPH, MSHEd, LNFA, Assistant Professor, Texas State University, San Marcos, TX, 78666 U.S.A.
3. Graduate Student, Texas State University, San Marcos TX, 78666, U.S.A.

Corresponding Author:

Clemens Scott Kruse  
College of Health Professions  
School of Health Administration  
Texas State University  
HPB, 2nd Floor  
601 University Drive  
San Marcos, TX, 78666 U.S.A.  
United States  
Phone: 1 210 355 4742  
Fax: 1 512 245 8712  
Email: [scottkruse@txstate.edu](mailto:scottkruse@txstate.edu)

Keywords: Long-term care (LTC), electronic health record (EHR), electronic medical record (EMR), diffusion of innovation, HITECH Act

3067 words

Running page headline: Factors Associated w EHR Adoption in LTC

## ABSTRACT

**Objectives:** The Health Information Technology for Economic and Clinical Health (HITECH) Act created incentives for adopting electronic health records (EHRs) for some healthcare organizations, but long-term care (LTC) facilities are excluded from those incentives. There are realizable benefits of EHR adoption in LTC facilities; however, there is limited research about this topic. The purpose of this systematic literature review is to identify EHR adoption factors for LTC facilities that are ineligible for the HITECH Act incentives.

Formatted: Highlight

**Setting:** We conducted systematic searches of Cumulative Index of Nursing and Allied Health Literature (CINAHL) Complete via Ebsco B. Stephens Company (EBSCO Host), Google Scholar, and the university library search engine to collect data about EHR adoption factors in LTC facilities since 2009.

Formatted: Highlight

**Participants:** Search results were filtered by date range, full text, English language, and academic journals (n = 22).

**Interventions:** Multiple members of the research team read each article to confirm applicability and study conclusions.

**Primary and secondary outcome measures:** Researchers identified common themes across the literature: specifically facilitators and barriers to adoption of the EHR in LTC.

**Results:** Results identify facilitators and barriers associated with EHR adoption in LTC facilities. The most common facilitators include access to information and error reduction. The most prevalent barriers include initial costs, user perceptions, and implementation problems.

**Conclusions:** Similarities span the system selection phases and implementation process; of those, cost was the most common mentioned. These commonalities should help leaders in LTC facilities align strategic decisions to EHR adoption. This review may be useful for decision-

1  
2  
3  
4  
5  
6  
7  
8  
9  
10  
11  
12  
13  
14  
15  
16  
17  
18  
19  
20  
21  
22  
23  
24  
25  
26  
27  
28  
29  
30  
31  
32  
33  
34  
35  
36  
37  
38  
39  
40  
41  
42  
43  
44  
45  
46  
47  
48  
49  
50  
51  
52  
53  
54  
55  
56  
57  
58  
59  
60

makers attempting successful EHR adoption, policymakers trying to increase adoption rates

without expanding incentives, and vendors that produce EHRs. **Background:** The Health

Information Technology for Economic and Clinical Health (HITECH) Act created incentives for

adopting electronic health records (EHRs) for some healthcare organizations, but long-term care

(LTC) facilities are excluded from those incentives. There are realizable benefits of EHR

adoption in LTC facilities; however, there is limited research about this topic.

**Objectives:** The Health Information Technology for Economic and Clinical Health (HITECH)

Act created incentives for adopting electronic health records (EHRs) for some healthcare

organizations, but long-term care (LTC) facilities are excluded from those incentives. There are

realizable benefits of EHR adoption in LTC facilities; however, there is limited research about

this topic. The purpose of this systematic literature review is to identify EHR adoption factors for

LTC facilities that are ineligible for the HITECH Act incentives.

**Materials & Methods:** We conducted systematic searches of Cumulative Index of Nursing and

Allied Health Literature (CINAHL) Complete via Ebsco B. Stephens Company (EBSCO Host),

Google Scholar, and the university library search engine to collect data about EHR adoption

factors in LTC facilities. Search results were filtered by date range, full text, English language,

and academic journals (n = 22). All members of the research team read each article to confirm

applicability and study conclusions.

**Results:** Results identify facilitators and barriers associated with EHR adoption in LTC

facilities. The most common facilitators include access to information and error reduction. The

most prevalent barriers include initial costs, user perceptions, and implementation problems.

Formatted: Highlight

**Discussion:** Similarities span the system selection phases and implementation process; of those, cost was the most common mentioned. These commonalities should help leaders in LTC facilities align strategic decisions to EHR adoption.

**Conclusions:** This study may be useful for decision makers attempting successful EHR adoption, policymakers trying to increase adoption rates without expanding incentives, and vendors who produce EHRs.

Formatted: Highlight

### **STRENGTHS AND LIMITATIONS OF THIS STUDY**

Formatted: Highlight

This systematic review has several strengths and limitations, as detailed below.

#### **Strengths**

- Adds to a body of knowledge of EHR adoption.
- Contributes toward EHR adoption in LTC.
- Provides a systematic review, in accordance with PRISMA.
- Queries three well known research databases.
- Queries use key terms registered with MeSH.
- Multiple reviewers determined inclusion and exclusion criteria.

#### **Limitations**

- Only five years were examined.
- An objective assessment of study bias was not conducted in this review.
- Selection bias will always exist in subjective decisions (inclusion criteria). Controls for selection bias were enacted: more than one author had to recommend that an article be included in the study. The identification of both enablers and barriers followed the same rule.

Formatted: Font: (Default) Times New Roman, 12 pt

Formatted: List Paragraph, Bulleted + Level: 1 + Aligned at: 0.25" + Indent at: 0.5"

1  
2  
3  
4  
5  
6  
7  
8  
9  
10  
11  
12  
13  
14  
15  
16  
17  
18  
19  
20  
21  
22  
23  
24  
25  
26  
27  
28  
29  
30  
31  
32  
33  
34  
35  
36  
37  
38  
39  
40  
41  
42  
43  
44  
45  
46  
47  
48  
49  
50  
51  
52  
53  
54  
55  
56  
57  
58  
59  
60

## INTRODUCTION, BACKGROUND & SIGNIFICANCE

### Incentives

The Health Information Technology for Economic and Clinical Health (HITECH) Act of the American Recovery and Reinvestment Act (ARRA) of 2009 created reimbursement incentives for U.S. healthcare organizations that are using EHRs in meaningful ways.<sup>1</sup> Long-term care facilities (as defined by the ARRA) are facility types excluded from the incentives including: skilled nursing homes, assisted living facilities, LTC hospitals, rehabilitation hospitals, and psychiatric hospitals. Unfortunately, there has been no clear communication regarding reasons why “ineligible providers” have been excluded from the incentives under the ARRA. This is despite a relatively large body of evidence showing that there is value in the use of EHR in long-term care settings where it not only improves resident care, but also increases communications between providers, consultants, hospital, and nursing home staff.<sup>2</sup> There is documentation that exists which alludes to Congress wanting to understand the extent to which ineligible providers work in settings which might receive EHR incentives under the ARRA.<sup>3</sup> However, it should be noted that eligible providers (physicians for instance) were able to assign their incentive funding to a facility of their choice (whether or not that facility was an eligible provider), but no evidence exists to the extent of this assignment in the literature or to whom.<sup>3</sup> This represents not only a potentially large amount of untrackable incentive funds under the ARRA, but also a source of statistical interference when “meaningful use” is assessed.

While facilities eligible for these incentives demonstrate EHR adoption rates of about 12%, ineligible facilities have adoption rates of only 2-4%.<sup>4</sup> Incentives and grants from the HITECH Act are clearly a major motivating factor for EHR adoption,<sup>5</sup> however, LTC facilities must bear the adoption costs on their own, which represents a significant barrier.<sup>5-15</sup>

## Identification and definition of key terms

The American College of Hospital Executives (ACHE) defines long-term care as “a continuum of medical and social services designed to support the needs of people living with chronic health problems that affect their ability to perform everyday activities.” Long-term care spans a continuum of “traditional medical services, social services, and housing”. Services in long-term care have a significantly different aim than traditional acute care services. While acute-care services aim to restore the patient to health, long-term care “aims to prevent deterioration and promote social adjustment to stages of decline” and it is delivered through a wide range of care givers and environments both in a healthcare facility and at home.<sup>16</sup> A large majority (92%) of long-term care facilities are privately owned and operated. The aging of the population creates an ever-increasing shortage of LTC beds per 1000 people 65 and over.

Estimates show this trend will continue until the year 2030 with the percentage of persons 65 or over ballooning to 19% of the population.<sup>17</sup> The broad definition from the ACHE could encompass a wider range than necessary for the purposes of this research. The research question we posited would only be appropriate for health care organizations that would have a use for the

EHR. While we think that an EHR would be beneficial at all levels of care to compensate for the lack of a provider of continuity between levels of care, we also look pragmatically at the cost versus the benefit. Because funding for an EHR would come from each independent health care organization in the U.S., An an assisted-living facility in the U.S. would have little use not have a significant need for an EHR that manages a patient’s entire continuum of care; ~~when~~ the facility may only need to manage something as small as medication or diet, which would not justify the millions of dollars to implement an EHR solution. Those with the greatest need for an EHR

Formatted: Highlight

Formatted: Highlight

Formatted: Highlight

Formatted: Highlight

Formatted: Highlight

1  
2  
3  
4  
5  
6  
7  
8  
9  
10  
11  
12  
13  
14  
15  
16  
17  
18  
19  
20  
21  
22  
23  
24  
25  
26  
27  
28  
29  
30  
31  
32  
33  
34  
35  
36  
37  
38  
39  
40  
41  
42  
43  
44  
45  
46  
47  
48  
49  
50  
51  
52  
53  
54  
55  
56  
57  
58  
59  
60

would be those that manage the chronic conditions like a nursing home, or Skilled Nursing Facility. For the purposes of this study

Formatted: Highlight

The taxonomy for the Electronic Health Record widely varies: digital medical record, computerized patient record, electronic medical record, digital medical record, etc. For the purposes of this study, the term EHR will be used exclusively to speak to the longitudinal and interoperable capabilities of an electronic medical record. This practice is supported by the World Health Organization (WHO).<sup>18</sup> The inherent advantages of the EHR are that it can enable any certified, credentialed provider to access any patient record from any health care organization, but the provider will only have access to the information necessary for the immediate incident of care. The EHR enables providers to see past history, allergies, and treatment regimens with trend analysis.<sup>19</sup>

In 2009, the US Government passed the American Recover and Reinvestment Act (ARRA), which included a significant section for healthcare intended to incentivize the adoption of the EHR. This section was called: Health Information Technology for Economic and Clinical Health (HITECH) Act.<sup>1</sup> The three phases of Meaningful Use consume IT strategies because of the HITECH Act's timeline for healthcare organizations to qualify for monetary incentives. Unfortunately, long-term care facilities were not included in these incentives.

#### **EHR adoption among facilities**

Long-term care facilities that have adopted EHRs experience improvements in quality of care, documentation access, billing and reimbursement, and employee satisfaction and retention rates.<sup>5-15,20</sup> Interoperable EHRs may be especially useful to LTC facilities during periods of transitional care, when coordination and communication with other healthcare organizations is critical to achieving the best health outcomes.<sup>21</sup> Electronic health records are becoming more



1  
2  
3  
4  
5  
6  
7  
8  
9 important for LTC facilities because increased demand for services from aging baby-boomers is  
10 inevitable.<sup>22</sup> While eligible organizations have the benefit of incentives to mitigate some costs in  
11 attaining these benefits, LTC facilities must bear the full cost. There is a dearth of research  
12 available to help decision-makers at LTC facilities make objective conclusions about adopting  
13 EHRs, which is why this review is critical to future research.

### 18 **EHR impact**

19  
20 It is important to identify the factors that influence EHR adoption in LTC facilities that  
21 are not dependent on HITECH incentive payments. This study's focus is to identify what those  
22 adoption factors are, as well as discern the multitude of barriers those facilities face. While it is  
23 clear that implementing an EHR system could bring many benefits to organizations, realizing  
24 those benefits in the beginning stages might not be possible for every LTC facility.

### 29 **Objectives**

30  
31 The findings of this review will be useful to LTC facility administrators interested in  
32 adopting EHRs into their organization by helping them identify barriers to overcome and  
33 opportunities to lever. Policymakers may also find the identified factors useful when attempting  
34 to increase EHR adoption in the long-term care industry. Additionally, vendors can benefit from  
35 this article's information **so they can create to design** EHRs that are more useful for LTC  
36 facilities.  
37  
38  
39  
40  
41  
42

Formatted: Highlight

## 43 **METHODS**

### 44 **Data**

45  
46 Data for this review were gathered using three separate databases: Google Scholar,  
47 Cumulative Index of Nursing and Allied Health Literature (CINAHL) Complete via EBSCO  
48 Host, and PubMed (which queries MEDLINE). Search criteria focused on EHR adoption in  
49  
50  
51  
52  
53  
54  
55  
56  
57  
58  
59  
60

1  
2  
3  
4  
5  
6  
7  
8  
9  
10  
11  
12  
13  
14  
15  
16  
17  
18  
19  
20  
21  
22  
23  
24  
25  
26  
27  
28  
29  
30  
31  
32  
33  
34  
35  
36  
37  
38  
39  
40  
41  
42  
43  
44  
45  
46  
47  
48  
49  
50  
51  
52  
53  
54  
55  
56  
57  
58  
59  
60

long-term care. **To avoid the bandwagon effect, t**The authors independently reviewed the articles identified during the search **and independently summarized findings germane to this review.**

Formatted: Font: 12 pt, Highlight

Formatted: Font: 12 pt, Highlight

Following independent reviews, authors compared and discussed the articles and reason for inclusion in the study. Articles were only included if selected by at least two reviewers. The comparable search criteria demonstrated the authors had a similar understanding of the research problem.

### Sample

Research databases were queried using terms from the Medical Subject Headings (MeSH) at the National Center for Biotechnology Information (NCBI). Although multiple terms appeared for the EHR, the only heading listed in MeSH for LTC was “long-term care.” Several exclusion criteria were also specified: The authors began with broad database searches then narrowed the criteria to identify the most commonly mentioned factors listed in the articles. This method avoids excluding relevant data by too narrowly defining initial search criteria. Searches were limited to peer-reviewed journal articles in U.S.-based English language from 2009-2014 (n = 16). This process is illustrated by Figure 1.

Figure 1. An illustration of the literature review process

Searches continued until the results reached saturation by repeating information about costs, perceptions, and implementation.

## RESULTS

### Table of findings

The findings were summarized and inserted into the facilitators and barriers table after the authors chose articles to create the literature review. All duplicate articles were accounted for

and consolidated before the findings table was created. The authors then reanalyzed the articles and identified the individual factors affecting EHR adoption in LTC facilities after the articles reached information saturation. These factors were then compiled into a frequency table to aid in

the analysis. **An objective assessment of study bias was not conducted in this review.** Results are summarized in Table 1. **An expanded version of this table is provided as a supplementary file. It augments the information below with the title of each study, and study characteristics such as the study design, and data sources.**

Formatted: Font: (Default) Times New Roman, Highlight

Formatted: Highlight

Formatted: Highlight

Table 1. Summarized facilitators and barriers identified in the literature

| Authors                            | Facilitators                                                                                                                                                                                                                                      | Barriers                                                                                                                                                                                                                |
|------------------------------------|---------------------------------------------------------------------------------------------------------------------------------------------------------------------------------------------------------------------------------------------------|-------------------------------------------------------------------------------------------------------------------------------------------------------------------------------------------------------------------------|
| Wolf L, Harvell J, Jha AK. (2012). | <ul style="list-style-type: none"> <li>Emerging payment methods could encourage EHR adoption.</li> <li>“Quality Improvement Organizations” may increase adoption because they provide technical support that many LTC facilities need.</li> </ul> | <ul style="list-style-type: none"> <li>HITECH incentives only focus on acute care and primary physicians.</li> <li>Expanding the incentives to LTC facilities may be too costly.</li> </ul>                             |
| Wang T, Biedermann S. (2012).      | <ul style="list-style-type: none"> <li>Anticipating state and federal requirements.</li> <li>Good communication between vendors and LTC facilities.</li> <li>Education and training programs.</li> </ul>                                          | <ul style="list-style-type: none"> <li>Lack of initial investment resources.</li> <li>No technical infrastructure.</li> <li>Not enough time to implement the EHR.</li> <li>Lack of space for the new system.</li> </ul> |
| Resnick H, et al. (2009).          | <ul style="list-style-type: none"> <li>Error reduction.</li> <li>Quality.</li> <li>Efficiency.</li> <li>Better health outcomes.</li> </ul>                                                                                                        | <ul style="list-style-type: none"> <li>Cost.</li> <li>Complex systems (implementation).</li> <li>No standards (external).</li> </ul>                                                                                    |
| Davidson J. (2009).                | <ul style="list-style-type: none"> <li>Comprehensive implementation planning.</li> <li>Governmental initiatives.</li> <li>Management and staff support.</li> </ul>                                                                                | <ul style="list-style-type: none"> <li>Cost.</li> <li>Privacy issues.</li> <li>Incorrect vendor.</li> </ul>                                                                                                             |
| Hamid F, Cline TW. (2013).         | <ul style="list-style-type: none"> <li>EHR satisfaction increases when the users understand the benefits.</li> <li>Supportive management.</li> <li>Training programs.</li> </ul>                                                                  | <ul style="list-style-type: none"> <li>Cost.</li> <li>Perceived lack of usefulness.</li> <li>Time consuming.</li> </ul>                                                                                                 |
| Alexander G, Madsen R. (2009).     | <ul style="list-style-type: none"> <li>Improve clinical decision making.</li> <li>Earlier intervention.</li> <li>Time savings.</li> </ul>                                                                                                         | <ul style="list-style-type: none"> <li>IT sophistication negatively correlated with detection of detection of incontinence (implementation issue?)</li> </ul>                                                           |

Formatted: Left, Space After: 0 pt, Line spacing: single

Formatted Table

Formatted: Left, Space After: 0 pt, Line spacing: single

Formatted: Left, Space After: 0 pt, Line spacing: single

Formatted: Left, Space After: 0 pt, Line spacing: single

Formatted: Left, Space After: 0 pt, Line spacing: single

Formatted: Left, Space After: 0 pt, Line spacing: single

Formatted: Left, Space After: 0 pt, Line spacing: single

| Authors                                           | Facilitators                                                                                                                                                                                                                                                                                                                                                       | Barriers                                                                                                                                                                                                                                                                                    |
|---------------------------------------------------|--------------------------------------------------------------------------------------------------------------------------------------------------------------------------------------------------------------------------------------------------------------------------------------------------------------------------------------------------------------------|---------------------------------------------------------------------------------------------------------------------------------------------------------------------------------------------------------------------------------------------------------------------------------------------|
| Phillips K, Wheeler C, Campbell J, et al. (2010). | <ul style="list-style-type: none"> <li>Government financial incentives.</li> <li>Reduced errors and adverse drug events.</li> <li>Including users in the design and implementation process.</li> </ul>                                                                                                                                                             | <ul style="list-style-type: none"> <li>Adoption costs.</li> <li>Efficiency outcomes were inconsistent.</li> <li>Incongruent cost savings.</li> <li>Lack of interoperability.</li> <li>Fear of changing the facility culture.</li> </ul>                                                     |
| Wilkins M. (2009).                                | <ul style="list-style-type: none"> <li>Training and learning the system increases adoption.</li> <li>Understanding the usefulness of the EHR technology.</li> </ul>                                                                                                                                                                                                | <ul style="list-style-type: none"> <li>Facility size.</li> <li>Lack of change agents or leaders in the facility.</li> <li>Lack of interoperability.</li> <li>Cost.</li> <li>Resistance to change.</li> </ul>                                                                                |
| Filipova AA. (2013).                              | <ul style="list-style-type: none"> <li>Federal and state government incentives or policy initiatives could offset financial barriers.</li> <li>Aligning organizational strategic plans could also encourage adoption.</li> </ul>                                                                                                                                   | <ul style="list-style-type: none"> <li>Financial barriers like no capital to implement an EHR and the cost of hardware and infrastructure.</li> <li>Organizational barriers.</li> <li>Legal and regulatory barriers.</li> <li>Technological barriers.</li> <li>Network barriers.</li> </ul> |
| Bezboruah KC, Hamann, DJ, Smith JD. (2014).       | <ul style="list-style-type: none"> <li>Institutional pressure like anticipated regulations and competition pressures increase EHR adoption.</li> </ul>                                                                                                                                                                                                             | <ul style="list-style-type: none"> <li>Cost of the electronic system and projected upgrades.</li> <li>Leaders perceiving staff's resistance to change.</li> <li>Misunderstanding how EHRs could be useful or not having enough information to chose the right system.</li> </ul>            |
| Cherry B. (2011).                                 | <ul style="list-style-type: none"> <li>Fast-growing elder populations mean quality of care in LTC facilities must be addressed with EHRs.</li> <li>A strong implementation plan within the facility that aligns with strategic plans.</li> <li>Initial and follow-up training programs.</li> <li>A perception shift about the benefits of EHR adoption.</li> </ul> | <ul style="list-style-type: none"> <li>Cost and a lack of capital resources.</li> <li>Lack of industry standards.</li> <li>Complicated implementation processes.</li> <li>Lack of technical support.</li> <li>Not enough evidence to support EHR's proposed benefits.</li> </ul>            |
| Grabenbauer L, Skinner A, Windle J. (2011).       | <ul style="list-style-type: none"> <li>Improved communication.</li> <li>Patient data access and sharing.</li> </ul>                                                                                                                                                                                                                                                | <ul style="list-style-type: none"> <li>Cost.</li> <li>Reduced time with patients.</li> <li>Currently EHRs do not impact population health.</li> </ul>                                                                                                                                       |
| Cherry B, Ford E,                                 | <ul style="list-style-type: none"> <li>Rapid patient record retrieval.</li> </ul>                                                                                                                                                                                                                                                                                  | <ul style="list-style-type: none"> <li>Technology and</li> </ul>                                                                                                                                                                                                                            |

Formatted: Left, Space After: 0 pt, Line spacing: single

Formatted Table

Formatted: Left, Space After: 0 pt, Line spacing: single

Formatted: Left, Space After: 0 pt, Line spacing: single

Formatted: Left, Space After: 0 pt, Line spacing: single

Formatted: Left, Space After: 0 pt, Line spacing: single

Formatted: Left, Space After: 0 pt, Line spacing: single

Formatted: Left, Space After: 0 pt, Line spacing: single

Formatted: Left, Space After: 0 pt, Line spacing: single

1  
2  
3  
4  
5  
6  
7  
8  
9  
10  
11  
12  
13  
14  
15  
16  
17  
18  
19  
20  
21  
22  
23  
24  
25  
26  
27  
28  
29  
30  
31  
32  
33  
34  
35  
36  
37  
38  
39  
40  
41  
42  
43  
44  
45  
46  
47  
48  
49  
50  
51  
52  
53  
54  
55  
56  
57  
58  
59  
60

| Authors                                                   | Facilitators                                                                                                                                                                                                                                                               | Barriers                                                                                                                                                                                                                                                                                                                                                        |
|-----------------------------------------------------------|----------------------------------------------------------------------------------------------------------------------------------------------------------------------------------------------------------------------------------------------------------------------------|-----------------------------------------------------------------------------------------------------------------------------------------------------------------------------------------------------------------------------------------------------------------------------------------------------------------------------------------------------------------|
| Peterson L. (2011):                                       | <ul style="list-style-type: none"> <li>Better document consistency, quality, and accuracy.</li> <li>Improvements in employee satisfaction and retention.</li> <li>Better patient assessments, oversight, and order processing.</li> <li>Better time management.</li> </ul> | <p>maintenance problems like downtime or learning the new system.</p> <ul style="list-style-type: none"> <li>Residents thought providers were more focused on the computers than on them.</li> </ul>                                                                                                                                                            |
| Tabar P. (2013):                                          | <ul style="list-style-type: none"> <li>Perceptions are changing in long-term care; EHRs are becoming a cost of doing business.</li> </ul>                                                                                                                                  | <ul style="list-style-type: none"> <li>Most EHRs were built for acute care and LTC facilities had trouble finding a system that met the organization's needs.</li> </ul>                                                                                                                                                                                        |
| <i>Vendor Group Develops EHR Code of Conduct.</i> (2013): | <ul style="list-style-type: none"> <li>Cost reductions.</li> <li>Improve patient outcomes.</li> <li>State programs could help fund a facility's EHR adoption.</li> </ul>                                                                                                   |                                                                                                                                                                                                                                                                                                                                                                 |
| Yu P, Zhang Y, Gong Y, et al. (2013):                     | <ul style="list-style-type: none"> <li>Continuous training.</li> <li>Open dialogue with vendors.</li> <li>Balancing EHR accuracy with patient care.</li> <li>Facilities should have all paper or all electronic systems.</li> </ul>                                        | <ul style="list-style-type: none"> <li>Staff resisted the new system because personal perceptions about their age, lack of documentation skills, or other reasons created limitations.</li> <li>Information management became too difficult and documents lacked consistency.</li> <li>Providers complained about spending less time with residents.</li> </ul> |
| Hamann DJ, Bezboraiah KC. (2013):                         | <ul style="list-style-type: none"> <li>Nonprofit facilities were 40% more likely to adopt EHRs.</li> <li>Nonprofits have more regulations, so may need the benefits of EHRs.</li> </ul>                                                                                    | <ul style="list-style-type: none"> <li>For-profit facilities lagged behind in EHR adoption rates.</li> <li>Fewer regulations enable for-profit facilities to invest in cost-effective endeavors and avoid the expense of EHR implementation.</li> </ul>                                                                                                         |
| Vest JR, Yoon J, Bossak BH. (2013):                       | <ul style="list-style-type: none"> <li>More EHR vendors.</li> <li>Trends show electronic record use is on the rise.</li> <li>Meaningful use makes EHRs more prevalent.</li> </ul>                                                                                          | <ul style="list-style-type: none"> <li>Lagging widespread EHR adoption.</li> <li>Misaligned incentives.</li> </ul>                                                                                                                                                                                                                                              |
| Weaver S. (2011):                                         | <ul style="list-style-type: none"> <li>Error reduction (quality).</li> <li>Improved efficiency.</li> <li>Consumer (user) perceptions</li> <li>Improved health outcomes</li> </ul>                                                                                          | <ul style="list-style-type: none"> <li>Difficulties transitioning from paper to EHR. (Implementation -)</li> <li>Training becomes paramount.</li> </ul>                                                                                                                                                                                                         |
| Gruber N, Darragh                                         | <ul style="list-style-type: none"> <li>Strong implementation team.</li> </ul>                                                                                                                                                                                              | <ul style="list-style-type: none"> <li>Minor increases in</li> </ul>                                                                                                                                                                                                                                                                                            |

Formatted: Left, Space After: 0 pt, Line spacing: single  
Formatted Table

Formatted: Left, Space After: 0 pt, Line spacing: single

Formatted: Left, Space After: 0 pt, Line spacing: single

Formatted: Left, Space After: 0 pt, Line spacing: single

Formatted: Left, Space After: 0 pt, Line spacing: single

Formatted: Left, Space After: 0 pt, Line spacing: single

Formatted: Left, Space After: 0 pt, Line spacing: single

Formatted: Left, Space After: 0 pt, Line spacing: single

| Authors                                     | Facilitators                                                                                                                                                                                                                                                                                             | Barriers                                                                                                                                                                                                                                                                           |
|---------------------------------------------|----------------------------------------------------------------------------------------------------------------------------------------------------------------------------------------------------------------------------------------------------------------------------------------------------------|------------------------------------------------------------------------------------------------------------------------------------------------------------------------------------------------------------------------------------------------------------------------------------|
| J, Puccio P, et al. (2010):                 | <ul style="list-style-type: none"> <li>• Train and prepare all users.</li> <li>• Have ample space for training.</li> <li>• Communicate often and thoroughly.</li> <li>• Set goals, tasks, and schedules for the implementation.</li> <li>• Reduced errors.</li> <li>• Improved documentation.</li> </ul> | operating expenses.                                                                                                                                                                                                                                                                |
| Holup AA, Dobbs D, Temple A, et al. (2014): | <ul style="list-style-type: none"> <li>• Rapidly aging populations stresses the need to create interoperable, coordinated EHRs for LTC facilities.</li> </ul>                                                                                                                                            | <ul style="list-style-type: none"> <li>• Long term care EHRs are not as comprehensive as acute care EHRs.</li> </ul>                                                                                                                                                               |
| Holup AA, Dobbs D, Meng H, et al. (2013):   | <ul style="list-style-type: none"> <li>• Created better health outcomes.</li> <li>• Reduced extra costs.</li> <li>• Improved delivery and quality.</li> <li>• An increasing elder population makes implementing EHRs a necessity.</li> <li>• Nonprofits were more likely to utilize EHRs.</li> </ul>     | <ul style="list-style-type: none"> <li>• High initial investment means slower adoption in facilities that cannot afford the EHR system, which slows the rate of becoming better integrated with acute care.</li> <li>• Facility characteristics determine EHR adoption.</li> </ul> |

Formatted: Left, Space After: 0 pt, Line spacing: single

Formatted Table

Formatted: Left, Space After: 0 pt, Line spacing: single

Formatted: Left, Space After: 0 pt, Line spacing: single

An analysis of the articles in the systematic literature review revealed multiple facilitators and barriers to adopting an EHR. The review's focus was on LTC facility facilitators and barriers. The facilitators to adoption included ease of access to information, error reduction, long-run cost savings, efficiency, and information security. The barriers to adaptation included increasing costs, users' negative perception, cultural changes, lack of proper training, and lack of implementation proper planning.

### Facilitators

The determined facilitators associated with EHR adoption were: access and transfer of information, long-run cost savings, error reduction, clinical and administrative efficiency, project planning, security, user perceptions, facility characteristics, health outcomes, time savings, and staff retention. The facilitators also have narrowed subsections throughout the articles. The benefits LTC facilities faced after adopting EHRs are connected to the facilitators. For example,

1  
2  
3  
4  
5  
6  
7  
8  
9 facilities realized an ability to get to patient records quickly and easily, which is related to access  
10 and transfer of information.<sup>7,8,15</sup> Cost savings looked at the long-run facility savings and how an  
11 EHR is an investment with benefits that take time to realize.<sup>23,24</sup> Error reduction was another  
12 benefit of using EHRs, expressed as fewer prescription errors, more patient medication and  
13 allergy alerts, and more overall health safeguards.<sup>8,9,20</sup> Efficiency enabled rapid information  
14 exchange through administrative channels, improved productivity and consistency, and better  
15 communication between clinical and administrative departments.<sup>9-11,15,20</sup>

## 22 **Barriers**

23  
24  
25 The barriers varied in topic specification. The broad categories determined from the  
26 literature review were: cost savings, user perception, implementation issues, external factors,  
27 training, facility characteristics, cultural change, project planning, security, staff retention, and  
28 system issues. Each broader category has sub-issues that LTC facilities face during EHR  
29 adoption.

30  
31  
32 Of the sub-issues, cost barriers were a consistent concern because adopting and  
33 implementing an EHR requires a substantial initial investment. Other cost concerns stem from  
34 the lack of funding for LTC facilities, future upgrades, and maintenance that will be necessary to  
35 successfully use the EHR.<sup>8,13</sup>

36  
37  
38 User perception barriers included issues with professional and public acceptance of the  
39 new system as well as functionality problems.<sup>8-10</sup> Implementation barriers were lack of complete  
40 understanding from the staff, too little training during and after implementation, and lack of time  
41 for implementation and understanding.<sup>5,6,14,20</sup> The external factors that present implementation

problems were employee recruitment, lack of industry standards, facility location, and impact on the population.<sup>5,14,15</sup> **These facilitators and barriers are summarized in Table 2.**

Formatted: Not Superscript/ Subscript, Highlight

Table 2. Factors identified in the literature

Formatted Table

| <b>Factors</b>                       | <b>Total Occurrences</b> |
|--------------------------------------|--------------------------|
| <b>Facilitators</b>                  |                          |
| Error Reduction                      | 7                        |
| Clinical & Administrative Efficiency | 7                        |
| Cost Savings                         | 6                        |
| Health Outcomes                      | 6                        |
| Access and Transfer to Information   | 5                        |
| Project Planning                     | 4                        |
| User Perceptions                     | 4                        |
| Security                             | 3                        |
| Facility Characteristics             | 3                        |
| Time Saving                          | 3                        |
| <b>Barriers</b>                      |                          |
| Cost                                 | 10                       |
| User Perceptions                     | 8                        |
| Implementation Issues                | 8                        |
| External Factors                     | 6                        |
| Training                             | 5                        |
| Facility Characteristics             | 4                        |
| Cultural Change                      | 2                        |
| Project Planning                     | 2                        |
| Security                             | 2                        |
| Staff Retention                      | 1                        |
| System Issues                        | 1                        |



## DISCUSSION

Many factors determine the adoption of EHR technology in LTC facilities. The authors found the cost, perceptions, and implementation process as the most significant factors that affect EHR adoption by LTC facilities. By considering these factors and the degree to which a facility can manipulate them, it may be possible to increase EHR use among LTC facilities to create better outcomes, reduce costs, and increase coordination of care.

### Population

The rapid increase in long-term care residency exemplifies the need for facilities to be efficient, coordinated, and have good patient outcomes. Quality measures would increase if EHRs were more prevalent in LTC facilities, but vendors' main focus is creating acute care EHRs;<sup>10,21</sup> which make current EHRs impractical for most LTC facilities.<sup>10,11,23</sup> The adoption rate could increase if there were standardization in the EHR market,<sup>10</sup> which would make systems easier to use across different facilities.

Vendors would benefit from connecting with long-term care leaders to understand how EHRs fit long-term care strategic planning. A useful EHR helps LTC facilities improve quality, reduce errors, aids with billing and reimbursement, increases employee satisfaction, and may also increase employee retention.<sup>6,8,13</sup> Long-term care facilities need EHRs that are interoperable with other hospital systems so transfers and coordination of care become easier and have less errors. Vendors would benefit from understanding how LTC facilities use EHRs and how to make them more compatible for long-term care needs.

### Cost

The cost of implementing the EHR was the most prevalent barrier. Many facilities may reject acquiring or installing an EHR because the initial cost is so high<sup>5-15</sup> and maintaining and

1  
2  
3  
4  
5  
6  
7  
8  
9 upgrading the EHR may also be too costly.<sup>10,13,20</sup> Lack of initial capital could inhibit the first step  
10 of considering adopting an EHR. There was a general theme that if LTC facilities had funding,  
11 they could become meaningful EHR users more quickly. While cost is a barrier, it is important to  
12 point out that many studies stressed the need for LTC facilities to be coordinated with acute care  
13 hospitals to run more efficiently and productively. Finding the money required to execute an  
14 EHR is critical to LTC facilities gaining the information it needs to make improved clinical  
15 decisions.  
16  
17  
18  
19  
20  
21

22 Cost was a running topic among many studies because the HITECH Act's meaningful  
23 use incentives do not include LTC facilities. Long-term care facilities lack the ability to  
24 participate the HITECH incentive program, yet there is a gap in research that explores different  
25 funding alternatives for long-term care.  
26  
27  
28

### 29 **Perceptions**

30  
31 Another major factor that determines if an EHR will be adopted by a LTC facility is the  
32 administrative and clinical user perceptions.<sup>5,8,10,13-15,20,25</sup> Perception can manifest as something  
33 that can hinder or help EHR adoption at LTC facilities. Rejecting an EHR may be due to a lack  
34 of understanding about the user benefits,<sup>8</sup> which might be connected to fear of change.<sup>13</sup> The  
35 perception that an EHR system will simply not be useful could also be a result of marketing  
36 shortfalls on the part of EHR vendors. Lack of usefulness may also result from not effectively  
37 implementing the system and failing to achieve expected benefits. However, concerns that the  
38 system will be difficult to use can be addressed by selecting a system with a focus on user  
39 interfaces. Furthermore, misunderstanding EHR benefits may lead to a perception that using this  
40 technology will reduce the amount of time physicians and nurses spend with residents.<sup>15,20,25</sup> A  
41  
42  
43  
44  
45  
46  
47  
48  
49  
50  
51  
52  
53  
54  
55  
56  
57  
58  
59  
60

1  
2  
3  
4  
5  
6  
7  
8  
9 surprising finding was that the negative impact providers perceived was due to a lack of  
10 training.<sup>6,14,15</sup>

11  
12 Training helps change negative perceptions and increases the likelihood of adopting an  
13 EHR; a theme among some articles was that initial, follow-up, and ongoing training is the best  
14 method to ensure broad EHR acceptance.<sup>8,14,15</sup> Training could also help people who lack general  
15 computer skills, documentation skills, and people who may find the systems difficult to  
16 navigate.<sup>25</sup> Having the funds to conduct proper training will determine whether users can learn to  
17 accept the new system, which further stresses the need for funding.

18  
19 Administrators' perceptions about the changing regulatory and competitive long-term  
20 care environment may present some EHR adoption opportunities. Reasons facilities chose to  
21 adopt an EHR include anticipation about increases in the regulatory environment and changes to  
22 reimbursement.<sup>4,13</sup> Some nursing home administrators feared increased regulations in the  
23 industry, and this prompted EHR adoption to prepare for a possible mandate.<sup>13</sup> Others chose to  
24 adopt EHRs due to emerging payment methods, such as bundled payments, which require better  
25 coordination of care with outside entities to receive higher reimbursements.<sup>4</sup> The competitive  
26 long-term care environment steered some organizations to adopt EHRs to emulate competitors'  
27 EHR success.<sup>13</sup> The competitive advantage of EHRs should be explained to decision-makers so  
28 they can confidently adopt the systems. Additionally, policymakers must offer incentives along  
29 with the increases in regulations and changes in reimbursement; unfunded mandates would  
30 degrade EHR perceptions in long-term care.

### 31 32 33 34 35 36 37 38 39 40 41 42 43 44 45 46 **Implementation**

47  
48 Adopting an EHR relies heavily on the execution of the implementation process. Many  
49 studies pointed to having a strategic plan that accounts for the size, governance, costs, facility  
50  
51  
52  
53  
54  
55  
56  
57  
58  
59  
60

1  
2  
3  
4  
5  
6  
7  
8  
9 needs, and regulatory requirements of the internal and external environments.<sup>8,10,13,14</sup> Also  
10 significant is having the right people to implement the system; this should include a committee,  
11 strong leadership, trainers, and the right vendor. Creating a successful implementation plan could  
12 make or break the EHR project. Some facilities found not having long-term care industry  
13 standards was a barrier to adoption because they did not have a benchmark to use for an  
14 implementation plan.<sup>6,14</sup> This finding's implication is a need to involve interest groups to create  
15 industry standards to help LTC facilities adopt EHRs in the future.  
16  
17  
18  
19  
20  
21

### 22 **Facilitators**

23  
24 Long-term care facilities may begin to realize the on-going benefits of EHR adoption  
25 after an organization weighs the EHR adoption barriers, determines whether it aligns with the  
26 strategic plan, and decides to make the steps to implementation. The facilitator's overarching  
27 theme was an ultimate increase in efficiency for the entire organization. This finding is  
28 interesting because the path to implementing an EHR can disrupt business in the beginning  
29 stages by taking time to train employees, integrate information, as well as cost the facility ample  
30 money. If decision-makers prioritize EHR adoption with an implementation plan, then the  
31 organization is more likely to realize facilitators like cost savings, better transfer of information,  
32 and error reduction.  
33  
34  
35  
36  
37  
38  
39

40  
41 Decision-makers should recognize the EHR facilitators, find ways to overcome the initial  
42 costs, and rely on research that indicates recognizable savings of successful system  
43 implementation. As with all decisions, there are costs and benefits to LTC facilities widely  
44 adopting EHRs, but the research suggests EHRs may soon be heavily utilized, and adopting one  
45 now could help prepare staff and residents for this inevitable change.  
46  
47  
48  
49  
50  
51  
52  
53  
54  
55  
56  
57  
58  
59  
60

## Limitations

This paper provides a review of current and comprehensive data about EHR adoption factors for LTC facilities, and will help those facilities understand the costs and benefits of adopting an EHR system.

This study generalized all LTC facilities together, which bolsters the study's external validity because many of the articles also conducted research this way. Long-term care facilities can be lumped together because they all lack HITECH incentives. The differences between the facilities are size, location, and reimbursement structure. The authors found different facilities adopted EHRs at various rates, but the difference was not relevant to this study's results because all LTC facilities have similar obstacles to adoption.

The lack of evidence written about EHR adoption among LTC facilities and the search database limits led to the exhaustive nature of adoption factors of the study. This study was limited to only current research, which helped create a comparison for LTC facilities that want to implement an EHR in today's environment.

## Conclusions

It is important to examine factors affecting EHR adoption in LTC facilities because those facilities do not receive HITECH incentives. This study identified numerous facilitating factors and barriers through a systematic review of current articles in three scholarly databases. This information can be useful for decision-makers attempting successful EHR adoption in their LTC facility, policymakers trying to increase adoption rates without expanding incentives, and vendors who wish to create EHRs that coordinate with long-term care.

1  
2  
3  
4  
5  
6  
7  
8  
9  
10  
11  
12  
13  
14  
15  
16  
17  
18  
19  
20  
21  
22  
23  
24  
25  
26  
27  
28  
29  
30  
31  
32  
33  
34  
35  
36  
37  
38  
39  
40  
41  
42  
43  
44  
45  
46  
47  
48  
49  
50  
51  
52  
53  
54  
55  
56  
57  
58  
59  
60

**FUNDING**

This research received no specific grant from any funding agency in the public, commercial or not for profit sectors'

There are no conflicts of interest identified between the authors, results, or publication.

Formatted: Highlight

There were neither humans nor animals used as subjects of this research. In accordance with 45CFR46, this research qualifies as IRB Exempt.

For peer review only

## **ACKNOWLEDGEMENTS & STATEMENT OF CONTRIBUTION**

Authors provided equal contribution to the final product. The topic originated as directed research for a class for a Masters in Health Administration. The research was intended as both instructional on the topic and on writing for journals for publication. Dr.s Kruse and Mileski provided guidance, advice, and independent analysis to validate that of the graduate students.

## **COMPETING INTERESTS**

Conflicts of interest: None declared

## **FUNDING**

This research received no specific grant from any funding agency in the public, commercial or not-for-profit sectors

## **MISCELENEOUS DECLARATION**

There were neither humans nor animals used as subjects of this research. In accordance with 45CFR46, this research qualifies as IRB Exempt.

## **ACKNOWLEDGEMENTS & STATEMENT OF CONTRIBUTION**

Authors provided equal contribution to the final product. The topic originated as directed research for a class for a Masters in Health Administration. The research was intended as both instructional on the topic and on writing for journals for publication. Dr.s Kruse and Mileski provided guidance, advice, and independent analysis to validate that of the graduate students.

## **FIGURE LEGEND**

Figure 1: Illustration of the manuscript-selection process for the review

Formatted: Highlight

## REFERENCES

1. Health Information Technology for Economic and Clinical Health Act, 42 U.S.C. § 201 2009.  
URL:  
[http://www.healthit.gov/sites/default/files/hitech\\_act\\_excerpt\\_from\\_arra\\_with\\_index.pdf](http://www.healthit.gov/sites/default/files/hitech_act_excerpt_from_arra_with_index.pdf)  
[accessed 3/18/2014] WebCite URL: <http://www.webcitation.org/6OApfh2QK>
2. Brandeis GH, Hogan M, Murphy M, Murray S. (2007). Electronic health record implementation in community nursing homes. *Journal of the American Medical Directors Association*, 8(1), 31-34.
3. Assistant Secretary for Planning and Evaluation. EHR Payment Incentives for Providers Ineligible for Payment Incentives and Other Funding Study. URL:  
<http://aspe.hhs.gov/daltcp/reports/2013/EHRPIap.shtml#appendD> [Accessed 9/9/2014]
4. Wolf L, Harvell J, Jha AK. Hospitals Ineligible For Federal Meaningful-Use Incentives Have Dismally Low Rates Of Adoption Of Electronic Health Records. *Health Aff*, 2012;31(3), 505–513. doi:10.1377/hlthaff.2011.0351 PMID: 22392661
5. Wang T, Biedermann S. Adoption and Utilization of Electronic Health Record Systems by Long-Term Care Facilities in Texas. *Perspectives in Health Information Management*, 2012;1–14. PMID: 22737099
6. Resnick HE, et al. "Use of electronic information systems in nursing homes: United States, 2004." *Journal of the American Medical Informatics Association* 16.2 (2009): 179-186.
7. Davidson J. Electronic medical records: what they are and how they will revolutionize the delivery of resident care... first of a two-part series. *Canadian Nursing Home* [serial online]. September 2009;20(3):15-16. Available from: CINAHL Complete, Ipswich, MA. Accessed July 9, 2014. ISSN: 0847-5520



- 1  
2  
3  
4  
5  
6  
7  
8  
9 8. Hamid F, Cline T. Providers' Acceptance Factors and their Perceived Barriers to Electronic  
10 Health Record (EHR) Adoption. *Online Journal Of Nursing Informatics* [serial online].  
11 September 2013;17(3):1-11. Available from: CINAHL Complete, Ipswich, MA. Accessed  
12 July 10, 2014. Permalink  
13 [http://libproxy.txstate.edu/login?url=http://search.ebscohost.com/login.aspx?direct=true&db=](http://libproxy.txstate.edu/login?url=http://search.ebscohost.com/login.aspx?direct=true&db=ccm&AN=2012367240&site=ehost-live)  
14 [ccm&AN=2012367240&site=ehost-live](http://libproxy.txstate.edu/login?url=http://search.ebscohost.com/login.aspx?direct=true&db=ccm&AN=2012367240&site=ehost-live)  
15  
16  
17  
18  
19
- 20 9. Alexander GL, Madsen R. IT sophistication and quality measures in nursing homes. *Journal of*  
21 *Gerontological Nursing* 2009;35(7): 22.  
22  
23
- 24 10. Phillips K, Wheeler C, Campbell J, et al. Electronic medical records in long-term care.  
25 *Journal of Hospital Marketing & Public Relations*, 2010;20(2), 131–142.  
26  
27 doi:10.1080/15390942.2010.493377 PMID: 20582852  
28
- 29 11. Wilkins M. Factors influencing acceptance of electronic health records in hospitals.  
30 *Perspectives in Health Information Management*, 2009;6, 18p. PMID: 20169018  
31  
32
- 33 12. Filipova AA. Electronic Health Records Use and Barriers and Benefits to Use in Skilled  
34 Nursing Facilities: *CIN: Computers, Informatics, Nursing*, 2013;31(7), 305–318.  
35  
36 doi:10.1097/NXN.0b013e318295e40e PMID: 23774447  
37  
38
- 39 13. Bezboruah KC, Hamann, DJ, Smith JD. Management attitudes and technology adoption in  
40 long-term care facilities. *Journal of Health Organization and Management*, 2014;28(3), 4–4.  
41  
42
- 43 14. Cherry B. Assessing Organizational Readiness for Electronic Health Record Adoption in  
44 Long-Term Care Facilities. *Journal of Gerontological Nursing*, 2011;37(10), 14–19.  
45  
46 doi:<http://dx.doi.org/10.3928/00989134-20110831-06>  
47
- 48 15. Grabenbauer L, Skinner A, Windle J. Electronic Health Record Adoption - Maybe It's not  
49 about the Money: Physician Super-Users, Electronic Health Records and Patient Care.  
50  
51  
52  
53  
54  
55  
56  
57  
58  
59  
60

1  
2  
3  
4  
5  
6  
7  
8  
9  
10  
11  
12  
13  
14  
15  
16  
17  
18  
19  
20  
21  
22  
23  
24  
25  
26  
27  
28  
29  
30  
31  
32  
33  
34  
35  
36  
37  
38  
39  
40  
41  
42  
43  
44  
45  
46  
47  
48  
49  
50  
51  
52  
53  
54  
55  
56  
57  
58  
59  
60

*Applied Clinical Informatics*, 2011;2(4), 460–471. doi:10.4338/ACI-2011-05-RA-0033

PMID: 23616888

16. McCall N. Long-term care: Definition, demand, cost, and financing. URL:  
<http://www.ache.org/PUBS/1mccall.pdf>, Webcitation:  
<http://www.webcitation.org/6SKzjPXXV1>
17. Association on aging. URL: [http://www.aoa.gov/Aging\\_Statistics/](http://www.aoa.gov/Aging_Statistics/) [accessed 9/4/2014]  
Webcitation: <http://www.webcitation.org/6SL0fi4rt>
18. Institute of Medicine, Key capabilities of an electronic health record, Institute of Medicine  
2003 Jul. URL <http://www.iom.edu/Reports/2003/Key-Capabilities-of-an-Electronic-Health-Record-System.aspx> [accessed 9/4/2014] WebCite URL:  
<http://www.webcitation.org/6ODtL6HKG>
19. U.S. Health and Human Services. Learn EHR Basics. URL:  
<http://www.healthit.gov/providers-professionals/learn-ehr-basics> [accessed 9/4/2014]  
Webcitation: <http://www.webcitation.org/6SL21pUQO>
20. Cherry B, Ford E, Peterson L. Experiences with electronic health records: Early adopters in  
long-term care facilities. *Health Care Management Review July/September 2011*; 36(3), 265–  
274. doi:10.1097/HMR.0b013e31820e110f PMID: 21646885
21. Tripp JS, Narus SP, Magill MK, et al. Evaluating the accuracy of existing EMR data as  
predictors of follow-up providers. *Journal of the American Medical Informatics Association*,  
2008;15(6), 787-790. DOI: 10.1197/jamia.M2753 PMID: 18755996
22. Robison J, Shugrue N, Fortinsky RH, et al. (2013). Long-Term Supports and Services  
Planning for the Future: Implications From a Statewide Survey of Baby Boomers and Older  
Adults. *The Gerontologist*, gnt094. doi: 10.1093/geront/gnt094 PMID: 23990621

- 1  
2  
3  
4  
5  
6  
7  
8  
9 23. Tabar P. Why EHRs matter to LTC's future. *Long-Term Living: For the Continuing Care*  
10 *Professional*, 2013;62(1), 14–16.  
11  
12 24. Vendor Group Develops EHR Code of Conduct. (2013). *Journal of AHIMA*, 84(8), 12–13.  
13  
14 25. Yu P, Zhang Y, Gong Y, et al. Unintended adverse consequences of introducing electronic  
15 health records in residential aged care homes. *International Journal of Medical Informatics*,  
16 2013;82(9), 772–788. doi:10.1016/j.ijmedinf.2013.05.008 PMID: 23770027  
17  
18 26. Hamann DJ, Bezboruah KC. Utilization of Technology by Long-Term Care Providers  
19 Comparisons Between For-Profit and Nonprofit Institutions. *Journal of Aging and Health*,  
20 2013;25(4), 535–554. doi:10.1177/0898264313480238 PMID: 23509114  
21  
22 27. Vest JR, Yoon J, Bossak BH. Changes to the electronic health records market in light of  
23 health information technology certification and meaningful use. *Journal Of The American*  
24 *Medical Informatics Association: JAMIA*, 2013;20(2), 227–232. doi:10.1136/amiajnl-2011-  
25 000769 PMID: 22917839  
26  
27 28. Goodman C. Savings in electronic medical record systems? Do it for the quality. *Health*  
28 *Affairs*, 2005;24(5), 1124–1126. PMID: 16162554  
29  
30 29. Gruber N, Darragh J, Puccia P, et al. Embracing change to improve performance:  
31 implementation of an electronic health record system. *Long-Term Living: For the Continuing*  
32 *Care Professional*, 2010;59(1), 28–31.  
33  
34 30. Holup AA, Dobbs D, Temple A, et al. Going Digital Adoption of Electronic Health Records  
35 in Assisted Living Facilities. *Journal of Applied Gerontology*, 2014;33(4), 494–504.  
36 doi:10.1177/0733464812454009 PMID: 24781968  
37  
38 31. Holup AA, Dobbs D, Meng H, et al. Facility characteristics associated with the use of  
39 electronic health records in residential care facilities. *Journal of the American Medical*  
40  
41  
42  
43  
44  
45  
46  
47  
48  
49  
50  
51  
52  
53  
54  
55  
56  
57  
58  
59  
60

1  
2  
3  
4  
5  
6  
7  
8  
9  
10  
11  
12  
13  
14  
15  
16  
17  
18  
19  
20  
21  
22  
23  
24  
25  
26  
27  
28  
29  
30  
31  
32  
33  
34  
35  
36  
37  
38  
39  
40  
41  
42  
43  
44  
45  
46  
47  
48  
49  
50  
51  
52  
53  
54  
55  
56  
57  
58  
59  
60

*Informatics Association*, 2013;20(4), 787–791. doi:10.1136/amiajnl-2012-001564 PMID: 23645538

32. Ford EW, Menachemi N, Peterson LT, et al. Resistance Is Futile: But It Is Slowing the Pace of EHR Adoption Nonetheless. *Journal of the American Medical Informatics Association : JAMIA*, 2009;16(3), 274–281. doi:10.1197/jamia.M3042 PMID: 19261931

For peer review only

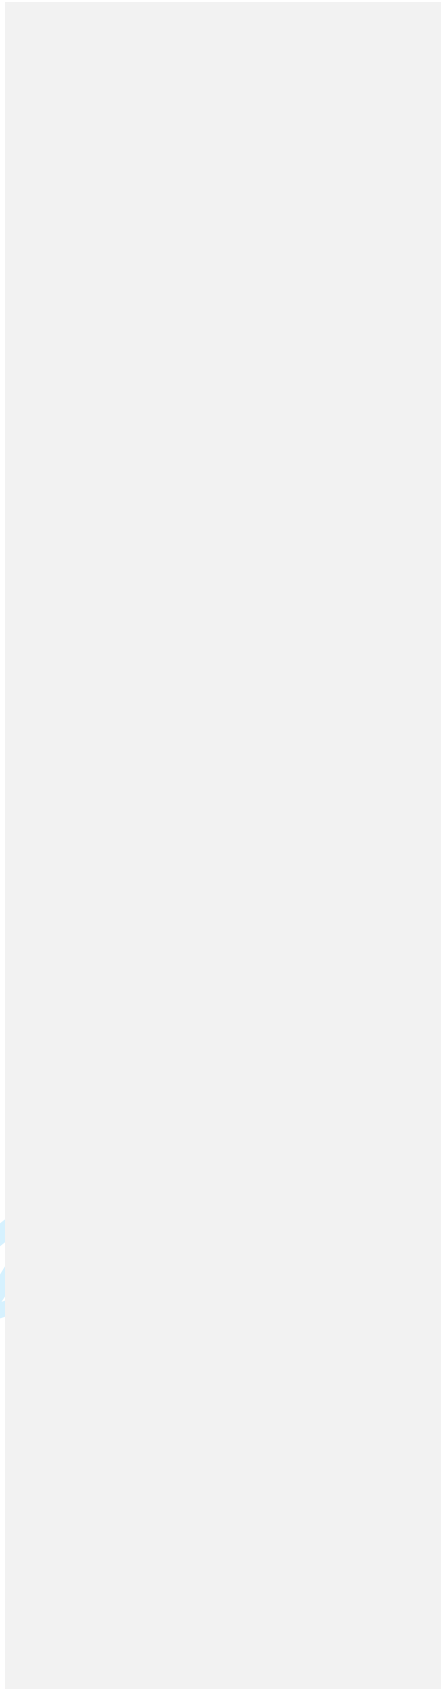

Table 1: Results from the review of the literature.

| Authors                                                         | Facilitators                                                                                                                                                                                                                                      | Barriers                                                                                                                                                                                                                                |
|-----------------------------------------------------------------|---------------------------------------------------------------------------------------------------------------------------------------------------------------------------------------------------------------------------------------------------|-----------------------------------------------------------------------------------------------------------------------------------------------------------------------------------------------------------------------------------------|
| Wolf L, Harvell J, Jha AK. (2012). <sup>4</sup>                 | <ul style="list-style-type: none"> <li>Emerging payment methods could encourage EHR adoption.</li> <li>“Quality Improvement Organizations” may increase adoption because they provide technical support that many LTC facilities need.</li> </ul> | <ul style="list-style-type: none"> <li>HITECH incentives only focus on acute care and primary physicians.</li> <li>Expanding the incentives to LTC facilities may be too costly.</li> </ul>                                             |
| Wang T, Biedermann S. (2012). <sup>3</sup>                      | <ul style="list-style-type: none"> <li>Anticipating state and federal requirements.</li> <li>Good communication between vendors and LTC facilities.</li> <li>Education and training programs.</li> </ul>                                          | <ul style="list-style-type: none"> <li>Lack of initial investment resources.</li> <li>No technical infrastructure.</li> <li>Not enough time to implement the EHR.</li> <li>Lack of space for the new system.</li> </ul>                 |
| Resnick H, et al. (2009). <sup>6</sup>                          | <ul style="list-style-type: none"> <li>Error reduction.</li> <li>Quality.</li> <li>Efficiency.</li> <li>Better health outcomes.</li> </ul>                                                                                                        | <ul style="list-style-type: none"> <li>Cost.</li> <li>Complex systems (implementation).</li> <li>No standards (external).</li> </ul>                                                                                                    |
| Davidson J. (2009). <sup>7</sup>                                | <ul style="list-style-type: none"> <li>Comprehensive implementation planning.</li> <li>Governmental initiatives.</li> <li>Management and staff support.</li> </ul>                                                                                | <ul style="list-style-type: none"> <li>Cost.</li> <li>Privacy issues.</li> <li>Incorrect vendor.</li> </ul>                                                                                                                             |
| Hamid F, Cline TW. (2013). <sup>8</sup>                         | <ul style="list-style-type: none"> <li>EHR satisfaction increases when the users understand the benefits.</li> <li>Supportive management.</li> <li>Training programs.</li> </ul>                                                                  | <ul style="list-style-type: none"> <li>Cost.</li> <li>Perceived lack of usefulness.</li> <li>Time consuming.</li> </ul>                                                                                                                 |
| Alexander G, Madsen R. (2009). <sup>9</sup>                     | <ul style="list-style-type: none"> <li>Improve clinical decision making.</li> <li>Earlier intervention.</li> <li>Time savings.</li> </ul>                                                                                                         | <ul style="list-style-type: none"> <li>IT sophistication negatively correlated with detection of detection of incontinence (implementation issue?).</li> </ul>                                                                          |
| Phillips K, Wheeler C, Campbell J, et al. (2010). <sup>10</sup> | <ul style="list-style-type: none"> <li>Government financial incentives.</li> <li>Reduced errors and adverse drug events.</li> <li>Including users in the design and implementation process.</li> </ul>                                            | <ul style="list-style-type: none"> <li>Adoption costs.</li> <li>Efficiency outcomes were inconsistent.</li> <li>Incongruent cost savings.</li> <li>Lack of interoperability.</li> <li>Fear of changing the facility culture.</li> </ul> |

Formatted: Highlight

| Authors                                                   | Facilitators                                                                                                                                                                                                                                                                                                                                                               | Barriers                                                                                                                                                                                                                                                                                              |
|-----------------------------------------------------------|----------------------------------------------------------------------------------------------------------------------------------------------------------------------------------------------------------------------------------------------------------------------------------------------------------------------------------------------------------------------------|-------------------------------------------------------------------------------------------------------------------------------------------------------------------------------------------------------------------------------------------------------------------------------------------------------|
| Wilkins M. (2009). <sup>11</sup>                          | <ul style="list-style-type: none"> <li>• Training and learning the system increases adoption.</li> <li>• Understanding the usefulness of the EHR technology.</li> </ul>                                                                                                                                                                                                    | <ul style="list-style-type: none"> <li>• Facility size.</li> <li>• Lack of change agents or leaders in the facility.</li> <li>• Lack of interoperability.</li> <li>• Cost.</li> <li>• Resistance to change.</li> </ul>                                                                                |
| Filipova AA. (2013). <sup>12</sup>                        | <ul style="list-style-type: none"> <li>• Federal and state government incentives or policy initiatives could offset financial barriers.</li> <li>• Aligning organizational strategic plans could also encourage adoption.</li> </ul>                                                                                                                                       | <ul style="list-style-type: none"> <li>• Financial barriers like no capital to implement an EHR and the cost of hardware and infrastructure.</li> <li>• Organizational barriers.</li> <li>• Legal and regulatory barriers.</li> <li>• Technological barriers.</li> <li>• Network barriers.</li> </ul> |
| Bezboruah KC, Hamann, DJ, Smith JD. (2014). <sup>13</sup> | <ul style="list-style-type: none"> <li>• Institutional pressure like anticipated regulations and competition pressures increase EHR adoption.</li> </ul>                                                                                                                                                                                                                   | <ul style="list-style-type: none"> <li>• Cost of the electronic system and projected upgrades.</li> <li>• Leaders perceiving staff's resistance to change.</li> <li>• Misunderstanding how EHRs could be useful or not having enough information to chose the right system.</li> </ul>                |
| Cherry B. (2011). <sup>14</sup>                           | <ul style="list-style-type: none"> <li>• Fast-growing elder populations mean quality of care in LTC facilities must be addressed with EHRs.</li> <li>• A strong implementation plan within the facility that aligns with strategic plans.</li> <li>• Initial and follow-up training programs.</li> <li>• A perception shift about the benefits of EHR adoption.</li> </ul> | <ul style="list-style-type: none"> <li>• Cost and a lack of capital resources.</li> <li>• Lack of industry standards.</li> <li>• Complicated implementation processes.</li> <li>• Lack of technical support.</li> <li>• Not enough evidence to support EHR's proposed benefits.</li> </ul>            |
| Grabenbauer L, Skinner A, Windle J. (2011). <sup>15</sup> | <ul style="list-style-type: none"> <li>• Improved communication.</li> <li>• Patient data access and sharing.</li> </ul>                                                                                                                                                                                                                                                    | <ul style="list-style-type: none"> <li>• Cost.</li> <li>• Reduced time with patients.</li> <li>• Currently EHRs do not impact population health.</li> </ul>                                                                                                                                           |
| Cherry B, Ford E.                                         | <ul style="list-style-type: none"> <li>• Rapid patient record retrieval.</li> </ul>                                                                                                                                                                                                                                                                                        | <ul style="list-style-type: none"> <li>• Technology and</li> </ul>                                                                                                                                                                                                                                    |

Formatted: Highlight

1  
2  
3  
4  
5  
6  
7  
8  
9  
10  
11  
12  
13  
14  
15  
16  
17  
18  
19  
20  
21  
22  
23  
24  
25  
26  
27  
28  
29  
30  
31  
32  
33  
34  
35  
36  
37  
38  
39  
40  
41  
42  
43  
44  
45  
46  
47  
48  
49  
50  
51  
52  
53  
54  
55  
56  
57  
58  
59  
60

| Authors                                                         | Facilitators                                                                                                                                                                                                                                                               | Barriers                                                                                                                                                                                                                                                                                                                                                        |
|-----------------------------------------------------------------|----------------------------------------------------------------------------------------------------------------------------------------------------------------------------------------------------------------------------------------------------------------------------|-----------------------------------------------------------------------------------------------------------------------------------------------------------------------------------------------------------------------------------------------------------------------------------------------------------------------------------------------------------------|
| Peterson L. (2011). <sup>20</sup>                               | <ul style="list-style-type: none"> <li>Better document consistency, quality, and accuracy.</li> <li>Improvements in employee satisfaction and retention.</li> <li>Better patient assessments, oversight, and order processing.</li> <li>Better time management.</li> </ul> | <ul style="list-style-type: none"> <li>maintenance problems like downtime or learning the new system.</li> <li>Residents thought providers were more focused on the computers than on them.</li> </ul>                                                                                                                                                          |
| Tabar P. (2013). <sup>23</sup>                                  | <ul style="list-style-type: none"> <li>Perceptions are changing in long-term care; EHRs are becoming a cost of doing business.</li> </ul>                                                                                                                                  | <ul style="list-style-type: none"> <li>Most EHRs were built for acute care and LTC facilities had trouble finding a system that met the organization's needs.</li> </ul>                                                                                                                                                                                        |
| Vendor Group Develops EHR Code of Conduct (2013). <sup>24</sup> | <ul style="list-style-type: none"> <li>Cost reductions.</li> <li>Improve patient outcomes.</li> <li>State programs could help fund a facility's EHR adoption.</li> </ul>                                                                                                   |                                                                                                                                                                                                                                                                                                                                                                 |
| Yu P, Zhang Y, Gong Y, et al. (2013). <sup>25</sup>             | <ul style="list-style-type: none"> <li>Continuous training.</li> <li>Open dialogue with vendors.</li> <li>Balancing EHR accuracy with patient care.</li> <li>Facilities should have all paper or all electronic systems.</li> </ul>                                        | <ul style="list-style-type: none"> <li>Staff resisted the new system because personal perceptions about their age, lack of documentation skills, or other reasons created limitations.</li> <li>Information management became too difficult and documents lacked consistency.</li> <li>Providers complained about spending less time with residents.</li> </ul> |
| Hamann DJ, Bezboruah KC. (2013). <sup>26</sup>                  | <ul style="list-style-type: none"> <li>Nonprofit facilities were 40% more likely to adopt EHRs.</li> <li>Nonprofits have more regulations, so may need the benefits of EHRs.</li> </ul>                                                                                    | <ul style="list-style-type: none"> <li>For-profit facilities lagged behind in EHR adoption rates.</li> <li>Fewer regulations enable for-profit facilities to invest in cost-effective endeavors and avoid the expense of EHR implementation.</li> </ul>                                                                                                         |
| Vest JR, Yoon J, Bossak BH. (2013). <sup>27</sup>               | <ul style="list-style-type: none"> <li>More EHR vendors.</li> <li>Trends show electronic record use is on the rise.</li> <li>Meaningful use makes EHRs more prevalent.</li> </ul>                                                                                          | <ul style="list-style-type: none"> <li>Lagging widespread EHR adoption.</li> <li>Misaligned incentives.</li> </ul>                                                                                                                                                                                                                                              |

Formatted: Highlight

1  
2  
3  
4  
5  
6  
7  
8  
9  
10  
11  
12  
13  
14  
15  
16  
17  
18  
19  
20  
21  
22  
23  
24  
25  
26  
27  
28  
29  
30  
31  
32  
33  
34  
35  
36  
37  
38  
39  
40  
41  
42  
43  
44  
45  
46  
47  
48  
49  
50  
51  
52  
53  
54  
55  
56  
57  
58  
59  
60

| Authors                                                     | Facilitators                                                                                                                                                                                                                                                                                                                                    | Barriers                                                                                                                                                                                                                                                                           |
|-------------------------------------------------------------|-------------------------------------------------------------------------------------------------------------------------------------------------------------------------------------------------------------------------------------------------------------------------------------------------------------------------------------------------|------------------------------------------------------------------------------------------------------------------------------------------------------------------------------------------------------------------------------------------------------------------------------------|
| Weaver S. (2011). <sup>28</sup>                             | <ul style="list-style-type: none"> <li>• Error reduction (quality).</li> <li>• Improved efficiency.</li> <li>• Consumer (user) perceptions</li> <li>• Improved health outcomes</li> </ul>                                                                                                                                                       | <ul style="list-style-type: none"> <li>• Difficulties transitioning from paper to EHR. (Implementation.)</li> <li>• Training becomes paramount.</li> </ul>                                                                                                                         |
| Gruber N, Darragh J, Puccia P, et al. (2010). <sup>29</sup> | <ul style="list-style-type: none"> <li>• Strong implementation team.</li> <li>• Train and prepare all users.</li> <li>• Have ample space for training.</li> <li>• Communicate often and thoroughly.</li> <li>• Set goals, tasks, and schedules for the implementation.</li> <li>• Reduced errors.</li> <li>• Improved documentation.</li> </ul> | <ul style="list-style-type: none"> <li>• Minor increases in operating expenses.</li> </ul>                                                                                                                                                                                         |
| Holup AA, Dobbs D, Temple A, et al. (2014). <sup>30</sup>   | <ul style="list-style-type: none"> <li>• Rapidly aging populations stresses the need to create interoperable, coordinated EHRs for LTC facilities.</li> </ul>                                                                                                                                                                                   | <ul style="list-style-type: none"> <li>• Long-term care EHRs are not as comprehensive as acute care EHRs.</li> </ul>                                                                                                                                                               |
| Holup AA, Dobbs D, Meng H, et al. (2013). <sup>31</sup>     | <ul style="list-style-type: none"> <li>• Created better health outcomes.</li> <li>• Reduced extra costs.</li> <li>• Improved delivery and quality.</li> <li>• An increasing elder population makes implementing EHRs a necessity.</li> <li>• Nonprofits were more likely to utilize EHRs.</li> </ul>                                            | <ul style="list-style-type: none"> <li>• High initial investment means slower adoption in facilities that cannot afford the EHR system, which slows the rate of becoming better integrated with acute care.</li> <li>• Facility characteristics determine EHR adoption.</li> </ul> |

Formatted: Highlight



1  
2  
3  
4  
5  
6  
7  
8  
9  
10  
11  
12  
13  
14  
15  
16  
17  
18  
19  
20  
21  
22  
23  
24  
25  
26  
27  
28  
29  
30  
31  
32  
33  
34  
35  
36  
37  
38  
39  
40  
41  
42  
43  
44  
45  
46  
47  
48  
49  
50  
51  
52  
53  
54  
55  
56  
57  
58  
59  
60

Table 2: Affinity matrix identifying frequency of factors listed in the literature

| Factors                              | Total Occurrences |
|--------------------------------------|-------------------|
| <b>Facilitators</b>                  |                   |
| Error Reduction                      | 7                 |
| Clinical & Administrative Efficiency | 7                 |
| Cost Savings                         | 6                 |
| Health Outcomes                      | 6                 |
| Access and Transfer to Information   | 5                 |
| Project Planning                     | 4                 |
| User Perceptions                     | 4                 |
| Security                             | 3                 |
| Facility Characteristics             | 3                 |
| Time Saving                          | 3                 |
| <b>Barriers</b>                      |                   |
| Cost                                 | 10                |
| User Perceptions                     | 8                 |
| Implementation Issues                | 8                 |
| External Factors                     | 6                 |
| Training                             | 5                 |
| Facility Characteristics             | 4                 |
| Cultural Change                      | 2                 |
| Project Planning                     | 2                 |
| Security                             | 2                 |
| Staff Retention                      | 1                 |
| System Issues                        | 1                 |

Formatted: Highlight

1  
2  
3  
4  
5  
6  
7  
8  
9  
10  
11  
12  
13  
14  
15  
16  
17  
18  
19  
20  
21  
22  
23  
24  
25  
26  
27  
28  
29  
30  
31  
32  
33  
34  
35  
36  
37  
38  
39  
40  
41  
42  
43  
44  
45  
46  
47  
48  
49  
50  
51  
52  
53  
54  
55  
56  
57  
58  
59  
60

Figure 1

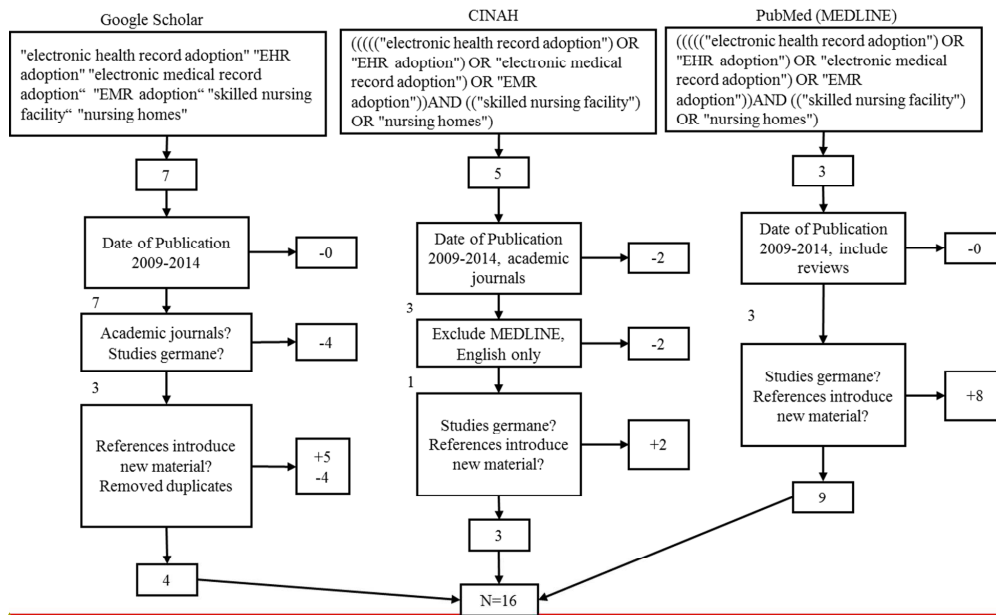

Formatted: Font: (Default) Times New Roman, 12 pt

Review only

1  
2  
3  
4  
5  
6  
7  
8  
9  
10  
11  
12  
13  
14  
15  
16  
17  
18  
19  
20  
21  
22  
23  
24  
25  
26  
27  
28  
29  
30  
31  
32  
33  
34  
35  
36  
37  
38  
39  
40  
41  
42  
43  
44  
45  
46  
47  
48  
49  
50  
51  
52  
53  
54  
55  
56  
57  
58  
59  
60

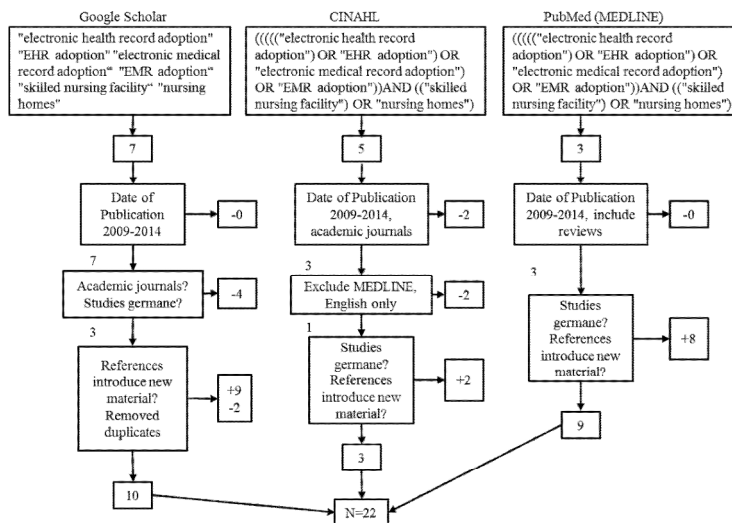

An illustration of the manuscript-selection process for the systematic review 279x215mm (300 x 300 DPI)

## Supplementary File

| Authors                                                                                                                                    | Study Characteristics                                                                                                                                                                                                       | Facilitators                                                                                                                                                                                                                                      | Barriers                                                                                                                                                                                                                |
|--------------------------------------------------------------------------------------------------------------------------------------------|-----------------------------------------------------------------------------------------------------------------------------------------------------------------------------------------------------------------------------|---------------------------------------------------------------------------------------------------------------------------------------------------------------------------------------------------------------------------------------------------|-------------------------------------------------------------------------------------------------------------------------------------------------------------------------------------------------------------------------|
| Wolf L, et al. (2012). Hospitals ineligible for federal meaningful use incentives have dismally low rates of adoption of EHR. <sup>4</sup> | <ul style="list-style-type: none"> <li>Secondary data analysis, 2009 health IT supplement to the AHA survey.</li> <li>Hospitals reported on 32 clinical functions of an EHR system and extent of implementation.</li> </ul> | <ul style="list-style-type: none"> <li>Emerging payment methods could encourage EHR adoption.</li> <li>“Quality Improvement Organizations” may increase adoption because they provide technical support that many LTC facilities need.</li> </ul> | <ul style="list-style-type: none"> <li>HITECH incentives only focus on acute care and primary physicians.</li> <li>Expanding the incentives to LTC facilities may be too costly.</li> </ul>                             |
| Wang T, et al. (2012). Adoption and utilization of EHR systems by LTC in Texas. <sup>5</sup>                                               | <ul style="list-style-type: none"> <li>Survey instrument mailed to all Texas LTC facilities.</li> <li>Data were self-reported rates of adoption.</li> </ul>                                                                 | <ul style="list-style-type: none"> <li>Anticipating state and federal requirements.</li> <li>Good communication between vendors and LTC facilities.</li> <li>Education and training programs.</li> </ul>                                          | <ul style="list-style-type: none"> <li>Lack of initial investment resources.</li> <li>No technical infrastructure.</li> <li>Not enough time to implement the EHR.</li> <li>Lack of space for the new system.</li> </ul> |
| Resnick H, et al. (2009). Use of Electronic Information Systems in Nursing Homes: United States. <sup>6</sup>                              | <ul style="list-style-type: none"> <li>Secondary data analysis from the National Nursing Home Survey (NNHS).</li> <li>The data reported a wide range in level of adoption.</li> </ul>                                       | <ul style="list-style-type: none"> <li>Error reduction.</li> <li>Quality.</li> <li>Efficiency.</li> <li>Better health outcomes.</li> </ul>                                                                                                        | <ul style="list-style-type: none"> <li>Cost.</li> <li>Complex systems (implementation).</li> <li>No standards (external).</li> </ul>                                                                                    |
| Davidson J. (2009). Electronic Medical Records: what they are and how they will revolutionize the delivery of care. <sup>7</sup>           | <ul style="list-style-type: none"> <li>Summary of articles (non-study) and concepts justifying the creation of the Canadian Health Infoway..</li> </ul>                                                                     | <ul style="list-style-type: none"> <li>Comprehensive implementation planning.</li> <li>Governmental initiatives.</li> <li>Management and staff support.</li> </ul>                                                                                | <ul style="list-style-type: none"> <li>Cost.</li> <li>Privacy issues.</li> <li>Incorrect vendor.</li> </ul>                                                                                                             |
| Hamid F, et al. (2013). Providers Acceptance Factors and                                                                                   | <ul style="list-style-type: none"> <li>Survey instrument given to physicians (n=24), nurse practitioners and PAs (n= 20) in acute-care settings.</li> </ul>                                                                 | <ul style="list-style-type: none"> <li>EHR satisfaction increases when the users understand the benefits.</li> <li>Supportive</li> </ul>                                                                                                          | <ul style="list-style-type: none"> <li>Cost.</li> <li>Perceived lack of usefulness.</li> <li>Time consuming.</li> </ul>                                                                                                 |

|                                                                                                                                                                                                                                                                                                                                                             |                                                                                                            |                                                                                                                                                                                                                                                                             |                                                                                                                                                                                                                                      |                                                                                                                                                                                                                                                   |
|-------------------------------------------------------------------------------------------------------------------------------------------------------------------------------------------------------------------------------------------------------------------------------------------------------------------------------------------------------------|------------------------------------------------------------------------------------------------------------|-----------------------------------------------------------------------------------------------------------------------------------------------------------------------------------------------------------------------------------------------------------------------------|--------------------------------------------------------------------------------------------------------------------------------------------------------------------------------------------------------------------------------------|---------------------------------------------------------------------------------------------------------------------------------------------------------------------------------------------------------------------------------------------------|
| 1<br>2<br>3<br>4<br>5<br>6<br>7<br>8<br>9<br>10<br>11<br>12<br>13<br>14<br>15<br>16<br>17<br>18<br>19<br>20<br>21<br>22<br>23<br>24<br>25<br>26<br>27<br>28<br>29<br>30<br>31<br>32<br>33<br>34<br>35<br>36<br>37<br>38<br>39<br>40<br>41<br>42<br>43<br>44<br>45<br>46<br>47<br>48<br>49<br>50<br>51<br>52<br>53<br>54<br>55<br>56<br>57<br>58<br>59<br>60 | their Perceived Barriers to Electronic Health Record EHR Adoption. <sup>8</sup>                            |                                                                                                                                                                                                                                                                             | management.<br><ul style="list-style-type: none"> <li>• Training programs.</li> </ul>                                                                                                                                                |                                                                                                                                                                                                                                                   |
|                                                                                                                                                                                                                                                                                                                                                             | Alexander G, et al. (2009). IT Sophistication and Quality Measures in Nursing Homes. <sup>9</sup>          | <ul style="list-style-type: none"> <li>• Survey instrument of 210 nursing homes in Missouri.</li> <li>• Two groups of measurements collected: level of IT sophistication and quality measures, as defined by the U.S. Center for Medicare and Medicaid Services.</li> </ul> | <ul style="list-style-type: none"> <li>• Improve clinical decision making.</li> <li>• Earlier intervention.</li> <li>• Time savings.</li> </ul>                                                                                      | <ul style="list-style-type: none"> <li>• IT sophistication negatively correlated with detection of incontinence (implementation issue?)</li> </ul>                                                                                                |
|                                                                                                                                                                                                                                                                                                                                                             | Phillips K, et al. (2010). Electronic medical records in long-term care. <sup>10</sup>                     | <ul style="list-style-type: none"> <li>• Systematic literature review.</li> </ul>                                                                                                                                                                                           | <ul style="list-style-type: none"> <li>• Government financial incentives.</li> <li>• Reduced errors and adverse drug events.</li> <li>• Including users in the design and implementation process.</li> </ul>                         | <ul style="list-style-type: none"> <li>• Adoption costs.</li> <li>• Efficiency outcomes were inconsistent.</li> <li>• Incongruent cost savings.</li> <li>• Lack of interoperability.</li> <li>• Fear of changing the facility culture.</li> </ul> |
|                                                                                                                                                                                                                                                                                                                                                             | Wilkins M. (2009). Factors influencing acceptance of electronic health records in hospitals. <sup>11</sup> | <ul style="list-style-type: none"> <li>• Survey instrument to members of the Arkansas Hospital Association.</li> <li>• LTC hospitals were cross-tabbed separately from other hospitals.</li> </ul>                                                                          | <ul style="list-style-type: none"> <li>• Training and learning the system increases adoption.</li> <li>• Understanding the usefulness of the EHR technology.</li> </ul>                                                              | <ul style="list-style-type: none"> <li>• Facility size.</li> <li>• Lack of change agents or leaders in the facility.</li> <li>• Lack of interoperability.</li> <li>• Cost.</li> <li>• Resistance to change.</li> </ul>                            |
|                                                                                                                                                                                                                                                                                                                                                             | Filipova AA. (2013). Electronic Health Records Use and Barriers and Benefits to Use in Skilled Nursing     | <ul style="list-style-type: none"> <li>• Cross-sectional design.</li> <li>• Mail and web survey instruments.</li> </ul>                                                                                                                                                     | <ul style="list-style-type: none"> <li>• Federal and state government incentives or policy initiatives could offset financial barriers.</li> <li>• Aligning organizational strategic plans could also encourage adoption.</li> </ul> | <ul style="list-style-type: none"> <li>• Financial barriers like no capital to implement an EHR and the cost of hardware and infrastructure.</li> <li>• Organizational barriers.</li> <li>• Legal and regulatory</li> </ul>                       |

|                                                                                                                                            |                                                                                                                                                                                                                 |                                                                                                                                                                                                                                                                                                                                                                            |                                                                                                                                                                                                                                                                                            |
|--------------------------------------------------------------------------------------------------------------------------------------------|-----------------------------------------------------------------------------------------------------------------------------------------------------------------------------------------------------------------|----------------------------------------------------------------------------------------------------------------------------------------------------------------------------------------------------------------------------------------------------------------------------------------------------------------------------------------------------------------------------|--------------------------------------------------------------------------------------------------------------------------------------------------------------------------------------------------------------------------------------------------------------------------------------------|
| Facilities. <sup>12</sup>                                                                                                                  |                                                                                                                                                                                                                 |                                                                                                                                                                                                                                                                                                                                                                            | barriers. <ul style="list-style-type: none"> <li>• Technological barriers.</li> <li>• Network barriers.</li> </ul>                                                                                                                                                                         |
| Bezboruah KC, et al. (2014). Management attitudes and technology adoption in long-term care facilities. <sup>13</sup>                      | <ul style="list-style-type: none"> <li>• Exploratory, qualitative case study.</li> </ul>                                                                                                                        | <ul style="list-style-type: none"> <li>• Institutional pressure like anticipated regulations and competition pressures increase EHR adoption.</li> </ul>                                                                                                                                                                                                                   | <ul style="list-style-type: none"> <li>• Cost of the electronic system and projected upgrades.</li> <li>• Leaders perceiving staff's resistance to change.</li> <li>• Misunderstanding how EHRs could be useful or not having enough information to choose the right system.</li> </ul>    |
| Cherry B. (2011). Management attitudes and technology adoption in long-term care facilities. <sup>14</sup>                                 | <ul style="list-style-type: none"> <li>• Survey instrument to LTC facilities in Texas.</li> </ul>                                                                                                               | <ul style="list-style-type: none"> <li>• Fast-growing elder populations mean quality of care in LTC facilities must be addressed with EHRs.</li> <li>• A strong implementation plan within the facility that aligns with strategic plans.</li> <li>• Initial and follow-up training programs.</li> <li>• A perception shift about the benefits of EHR adoption.</li> </ul> | <ul style="list-style-type: none"> <li>• Cost and a lack of capital resources.</li> <li>• Lack of industry standards.</li> <li>• Complicated implementation processes.</li> <li>• Lack of technical support.</li> <li>• Not enough evidence to support EHR's proposed benefits.</li> </ul> |
| Grabenbauer L, et al. (2011). Electronic Health Record Adoption - Maybe It's not about the Money: Physician Super-Users, Electronic Health | <ul style="list-style-type: none"> <li>• Qualitative study conducted to compare two robust EHR solutions.</li> <li>• EHR- savvy users from multiple organizations interviewed through focus groups..</li> </ul> | <ul style="list-style-type: none"> <li>• Improved communication.</li> <li>• Patient data access and sharing.</li> </ul>                                                                                                                                                                                                                                                    | <ul style="list-style-type: none"> <li>• Cost.</li> <li>• Reduced time with patients.</li> <li>• Currently EHRs do not impact population health.</li> </ul>                                                                                                                                |

|                                                                                                                                             |                                                                                                                                                                                                                                       |                                                                                                                                                                                                                                                                                                                               |                                                                                                                                                                                                                                                                                                                                                                       |
|---------------------------------------------------------------------------------------------------------------------------------------------|---------------------------------------------------------------------------------------------------------------------------------------------------------------------------------------------------------------------------------------|-------------------------------------------------------------------------------------------------------------------------------------------------------------------------------------------------------------------------------------------------------------------------------------------------------------------------------|-----------------------------------------------------------------------------------------------------------------------------------------------------------------------------------------------------------------------------------------------------------------------------------------------------------------------------------------------------------------------|
| Records and Patient Care. <sup>15</sup>                                                                                                     |                                                                                                                                                                                                                                       |                                                                                                                                                                                                                                                                                                                               |                                                                                                                                                                                                                                                                                                                                                                       |
| Cherry B, et al. (2011). Experiences with electronic health records: Early adopters in long-term care facilities. <sup>20</sup>             | <ul style="list-style-type: none"> <li>• Semi-structured interviews conducted at 10 LTC sites.</li> <li>• Interviewees consisted of administrators, nurse managers, nurses, certified nurse aides, and other system users.</li> </ul> | <ul style="list-style-type: none"> <li>• Rapid patient record retrieval.</li> <li>• Better document consistency, quality, and accuracy.</li> <li>• Improvements in employee satisfaction and retention.</li> <li>• Better patient assessments, oversight, and order processing.</li> <li>• Better time management.</li> </ul> | <ul style="list-style-type: none"> <li>• Technology and maintenance problems like downtime or learning the new system.</li> <li>• Residents thought providers were more focused on the computers than on them.</li> </ul>                                                                                                                                             |
| Tabar P. (2013). Why EHRs matter to LTC's future. <sup>23</sup>                                                                             | <ul style="list-style-type: none"> <li>• Editorial.</li> </ul>                                                                                                                                                                        | <ul style="list-style-type: none"> <li>• Perceptions are changing in long-term care; EHRs are becoming a cost of doing business.</li> </ul>                                                                                                                                                                                   | <ul style="list-style-type: none"> <li>• Most EHRs were built for acute care and LTC facilities had trouble finding a system that met the organization's needs.</li> </ul>                                                                                                                                                                                            |
| Vendor group develops EHR code of conduct. (2013). <sup>24</sup>                                                                            | <ul style="list-style-type: none"> <li>• Journal bulletin board post.</li> </ul>                                                                                                                                                      | <ul style="list-style-type: none"> <li>• Cost reductions.</li> <li>• Improve patient outcomes.</li> <li>• State programs could help fund a facility's EHR adoption.</li> </ul>                                                                                                                                                |                                                                                                                                                                                                                                                                                                                                                                       |
| Yu P, et al. (2013). Unintended adverse consequences of introducing electronic health records in residential aged care homes. <sup>25</sup> | <ul style="list-style-type: none"> <li>• Qualitative semi-structured interview study of 9 residential aged care homes.</li> <li>• User perceptions evaluated.</li> </ul>                                                              | <ul style="list-style-type: none"> <li>• Continuous training.</li> <li>• Open dialogue with vendors.</li> <li>• Balancing EHR accuracy with patient care.</li> </ul>                                                                                                                                                          | <ul style="list-style-type: none"> <li>• Staff resisted the new system because personal perceptions about their age, lack of documentation skills, or other reasons created limitations.</li> <li>• Information management became too difficult and documents lacked consistency.</li> <li>• Providers complained about spending less time with residents.</li> </ul> |

|                                                                                                                                                                                                                                                                                            |                                                                                                                                                                                                               |                                                                                                                                                                                                                                                               |                                                                                                                                                                                                                                                             |
|--------------------------------------------------------------------------------------------------------------------------------------------------------------------------------------------------------------------------------------------------------------------------------------------|---------------------------------------------------------------------------------------------------------------------------------------------------------------------------------------------------------------|---------------------------------------------------------------------------------------------------------------------------------------------------------------------------------------------------------------------------------------------------------------|-------------------------------------------------------------------------------------------------------------------------------------------------------------------------------------------------------------------------------------------------------------|
| <p>1<br/>2<br/>3<br/>4<br/>5<br/>6<br/>7<br/>8<br/>9<br/>10<br/>11<br/>12<br/>13<br/>14<br/>15<br/>16</p> <p>Hamann DJ, et al. (2013). Utilization of Technology by Long-Term Care Providers Comparisons Between For-Profit and Nonprofit Institutions.<sup>26</sup></p>                   | <ul style="list-style-type: none"> <li>• Secondary data analysis of multiple surveys conducted by the CDC.</li> <li>•</li> </ul>                                                                              | <ul style="list-style-type: none"> <li>• Nonprofit facilities were 40% more likely to adopt EHRs.</li> <li>• Nonprofits have more regulations, so may need the benefits of EHRs.</li> </ul>                                                                   | <ul style="list-style-type: none"> <li>• For-profit facilities lagged behind in EHR adoption rates.</li> <li>• Fewer regulations enable for-profit facilities to invest in cost-effective endeavors and avoid the expense of EHR implementation.</li> </ul> |
| <p>17<br/>18<br/>19<br/>20<br/>21<br/>22<br/>23<br/>24<br/>25<br/>26<br/>27<br/>28<br/>29<br/>30<br/>31<br/>32</p> <p>Vest JR, et al. (2013). Changes to the electronic health records market in light of health information technology certification and meaningful use.<sup>27</sup></p> | <ul style="list-style-type: none"> <li>• Secondary data analysis of HIMSS data.</li> <li>• Hospital referral regions were used to define local markets.</li> <li>• Analysis was changes over time.</li> </ul> | <ul style="list-style-type: none"> <li>• More EHR vendors.</li> <li>• Trends show electronic record use is on the rise.</li> <li>• Meaningful use makes EHRs more prevalent.</li> </ul>                                                                       | <ul style="list-style-type: none"> <li>• Lagging widespread EHR adoption.</li> <li>• Misaligned incentives.</li> </ul>                                                                                                                                      |
| <p>33<br/>34<br/>35<br/>36<br/>37<br/>38<br/>39<br/>40<br/>41</p> <p>Weaver. (2005). EHR adoption in LTC and the HIM value.<sup>28</sup></p>                                                                                                                                               | <ul style="list-style-type: none"> <li>• Practice brief (a regular section in the journal).</li> <li>• A publication of practice guidelines for managing health information.</li> </ul>                       | <ul style="list-style-type: none"> <li>• Error reduction (quality).</li> <li>• Improved efficiency.</li> <li>• Consumer (user) perceptions</li> <li>• Improved health outcomes</li> </ul>                                                                     | <ul style="list-style-type: none"> <li>• Difficulties transitioning from paper to EHR. (Implementation .)</li> <li>• Training becomes paramount.</li> </ul>                                                                                                 |
| <p>42<br/>43<br/>44<br/>45<br/>46<br/>47<br/>48<br/>49<br/>50<br/>51<br/>52<br/>53<br/>54</p> <p>Gruber N, et al. (2010). Embracing change to improve performance: implementation of an electronic health record system.<sup>29</sup></p>                                                  | <ul style="list-style-type: none"> <li>• Case study of an implementation of an EHR in a facility.</li> <li>• Includes cost, staffing, and experience over 2 years.</li> </ul>                                 | <ul style="list-style-type: none"> <li>• Strong implementation team.</li> <li>• Communicate often and thoroughly.</li> <li>• Set goals, tasks, and schedules for the implementation.</li> <li>• Reduced errors.</li> <li>• Improved documentation.</li> </ul> | <ul style="list-style-type: none"> <li>• Minor increases in operating expenses.</li> <li>• Training.</li> </ul>                                                                                                                                             |
| <p>55<br/>56<br/>57<br/>58<br/>59<br/>60</p> <p>Holup AA, et al. (2014).</p>                                                                                                                                                                                                               | <ul style="list-style-type: none"> <li>• Pilot study examining</li> </ul>                                                                                                                                     | <ul style="list-style-type: none"> <li>• Rapidly aging populations stresses the</li> </ul>                                                                                                                                                                    | <ul style="list-style-type: none"> <li>• Long-term care EHRs are not as</li> </ul>                                                                                                                                                                          |



|                                                                                                                                                            |                                                                                                                                                                |                                                                                                                                                                                                                                                                                                      |                                                                                                                                                                                                                                                                                    |
|------------------------------------------------------------------------------------------------------------------------------------------------------------|----------------------------------------------------------------------------------------------------------------------------------------------------------------|------------------------------------------------------------------------------------------------------------------------------------------------------------------------------------------------------------------------------------------------------------------------------------------------------|------------------------------------------------------------------------------------------------------------------------------------------------------------------------------------------------------------------------------------------------------------------------------------|
| <p>Going Digital Adoption of Electronic Health Records in Assisted Living Facilities.<sup>30</sup></p>                                                     | <p>associations between structural characteristics and adoption and use of EHR as a process characteristic in assisted living.</p>                             | <p>need to create interoperable, coordinated EHRs for LTC facilities.</p>                                                                                                                                                                                                                            | <p>comprehensive as acute care EHRs.</p>                                                                                                                                                                                                                                           |
| <p>Holup AA, et al. (2013). Facility characteristics associated with the use of electronic health records in residential care facilities.<sup>31</sup></p> | <ul style="list-style-type: none"> <li>• Secondary data analysis of annual survey instrument of the National Survey of Residential Care Facilities.</li> </ul> | <ul style="list-style-type: none"> <li>• Created better health outcomes.</li> <li>• Reduced extra costs.</li> <li>• Improved delivery and quality.</li> <li>• An increasing elder population makes implementing EHRs a necessity.</li> <li>• Nonprofits were more likely to utilize EHRs.</li> </ul> | <ul style="list-style-type: none"> <li>• High initial investment means slower adoption in facilities that cannot afford the EHR system, which slows the rate of becoming better integrated with acute care.</li> <li>• Facility characteristics determine EHR adoption.</li> </ul> |



# PRISMA 2009 Checklist

1  
2  
3  
4  
5  
6  
7  
8  
9  
10  
11  
12  
13  
14  
15  
16  
17  
18  
19  
20  
21  
22  
23  
24  
25  
26  
27  
28  
29  
30  
31  
32  
33  
34  
35  
36  
37  
38  
39  
40  
41  
42  
43  
44  
45  
46  
47  
48  
49

| Section/topic                      | #  | Checklist item                                                                                                                                                                                                                                                                                              | Reported on page # |
|------------------------------------|----|-------------------------------------------------------------------------------------------------------------------------------------------------------------------------------------------------------------------------------------------------------------------------------------------------------------|--------------------|
| <b>TITLE</b>                       |    |                                                                                                                                                                                                                                                                                                             |                    |
| Title                              | 1  | Identify the report as a systematic review, meta-analysis, or both.                                                                                                                                                                                                                                         | 1                  |
| <b>ABSTRACT</b>                    |    |                                                                                                                                                                                                                                                                                                             |                    |
| Structured summary                 | 2  | Provide a structured summary including, as applicable: background; objectives; data sources; study eligibility criteria, participants, and interventions; study appraisal and synthesis methods; results; limitations; conclusions and implications of key findings; systematic review registration number. | 2                  |
| <b>INTRODUCTION</b>                |    |                                                                                                                                                                                                                                                                                                             |                    |
| Rationale                          | 3  | Describe the rationale for the review in the context of what is already known.                                                                                                                                                                                                                              | 4-7                |
| Objectives                         | 4  | Provide an explicit statement of questions being addressed with reference to participants, interventions, comparisons, outcomes, and study design (PICOS).                                                                                                                                                  | 7                  |
| <b>METHODS</b>                     |    |                                                                                                                                                                                                                                                                                                             |                    |
| Protocol and registration          | 5  | Indicate if a review protocol exists, if and where it can be accessed (e.g., Web address), and, if available, provide registration information including registration number.                                                                                                                               | NA                 |
| Eligibility criteria               | 6  | Specify study characteristics (e.g., PICOS, length of follow-up) and report characteristics (e.g., years considered, language, publication status) used as criteria for eligibility, giving rationale.                                                                                                      | NA                 |
| Information sources                | 7  | Describe all information sources (e.g., databases with dates of coverage, contact with study authors to identify additional studies) in the search and date last searched.                                                                                                                                  | 8                  |
| Search                             | 8  | Present full electronic search strategy for at least one database, including any limits used, such that it could be repeated.                                                                                                                                                                               | Figure 1           |
| Study selection                    | 9  | State the process for selecting studies (i.e., screening, eligibility, included in systematic review, and, if applicable, included in the meta-analysis).                                                                                                                                                   | 8                  |
| Data collection process            | 10 | Describe method of data extraction from reports (e.g., piloted forms, independently, in duplicate) and any processes for obtaining and confirming data from investigators.                                                                                                                                  | 8                  |
| Data items                         | 11 | List and define all variables for which data were sought (e.g., PICOS, funding sources) and any assumptions and simplifications made.                                                                                                                                                                       | 5                  |
| Risk of bias in individual studies | 12 | Describe methods used for assessing risk of bias of individual studies (including specification of whether this was done at the study or outcome level), and how this information is to be used in any data synthesis.                                                                                      | 9                  |
| Summary measures                   | 13 | State the principal summary measures (e.g., risk ratio, difference in means).                                                                                                                                                                                                                               | 9                  |
| Synthesis of results               | 14 | Describe the methods of handling data and combining results of studies, if done, including measures of consistency (e.g., $I^2$ for each meta-analysis).                                                                                                                                                    | 10                 |

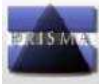

# PRISMA 2009 Checklist

Page 1 of 2

| Section/topic                 | #  | Checklist item                                                                                                                                                                                           | Reported on page # |
|-------------------------------|----|----------------------------------------------------------------------------------------------------------------------------------------------------------------------------------------------------------|--------------------|
| Risk of bias across studies   | 15 | Specify any assessment of risk of bias that may affect the cumulative evidence (e.g., publication bias, selective reporting within studies).                                                             | NA                 |
| Additional analyses           | 16 | Describe methods of additional analyses (e.g., sensitivity or subgroup analyses, meta-regression), if done, indicating which were pre-specified.                                                         | NA                 |
| <b>RESULTS</b>                |    |                                                                                                                                                                                                          |                    |
| Study selection               | 17 | Give numbers of studies screened, assessed for eligibility, and included in the review, with reasons for exclusions at each stage, ideally with a flow diagram.                                          | 10                 |
| Study characteristics         | 18 | For each study, present characteristics for which data were extracted (e.g., study size, PICOS, follow-up period) and provide the citations.                                                             | 10-13              |
| Risk of bias within studies   | 19 | Present data on risk of bias of each study and, if available, any outcome level assessment (see item 12).                                                                                                | NA                 |
| Results of individual studies | 20 | For all outcomes considered (benefits or harms), present, for each study: (a) simple summary data for each intervention group (b) effect estimates and confidence intervals, ideally with a forest plot. | Table 1            |
| Synthesis of results          | 21 | Present results of each meta-analysis done, including confidence intervals and measures of consistency.                                                                                                  | NA                 |
| Risk of bias across studies   | 22 | Present results of any assessment of risk of bias across studies (see Item 15).                                                                                                                          | NA                 |
| Additional analysis           | 23 | Give results of additional analyses, if done (e.g., sensitivity or subgroup analyses, meta-regression [see Item 16]).                                                                                    | NA                 |
| <b>DISCUSSION</b>             |    |                                                                                                                                                                                                          |                    |
| Summary of evidence           | 24 | Summarize the main findings including the strength of evidence for each main outcome; consider their relevance to key groups (e.g., healthcare providers, users, and policy makers).                     | 17                 |
| Limitations                   | 25 | Discuss limitations at study and outcome level (e.g., risk of bias), and at review-level (e.g., incomplete retrieval of identified research, reporting bias).                                            | 3,19               |
| Conclusions                   | 26 | Provide a general interpretation of the results in the context of other evidence, and implications for future research.                                                                                  | 20                 |
| <b>FUNDING</b>                |    |                                                                                                                                                                                                          |                    |
| Funding                       | 27 | Describe sources of funding for the systematic review and other support (e.g., supply of data); role of funders for the systematic review.                                                               | 21                 |

From: Moher D, Liberati A, Tetzlaff J, Altman DG, The PRISMA Group (2009). Preferred Reporting Items for Systematic Reviews and Meta-Analyses: The PRISMA Statement. PLoS Med 6(6): e1000097. doi:10.1371/journal.pmed1000097

For more information, visit: [www.prisma-statement.org](http://www.prisma-statement.org).

Page 2 of 2

For peer review only - <http://bmjopen.bmj.com/site/about/guidelines.xhtml>
