# Supplementary material for: Adoption factors associated with electronic health record among long-term care facilities: a systematic review
Source: HighWire-hosted journal article supplement (doi:10.1136/bmjopen-2014-006615), 2015-01-01
Supplement: bmjopen-2014-006615supp.pdf [file bmjopen-2014-006615supp.pdf]

## Supplementary File

| Authors                                                                                                                                    | Study Characteristics                                                                                                                                                                                                           | Facilitators                                                                                                                                                                                                                                          | Barriers                                                                                                                                                                                                                        |
|--------------------------------------------------------------------------------------------------------------------------------------------|---------------------------------------------------------------------------------------------------------------------------------------------------------------------------------------------------------------------------------|-------------------------------------------------------------------------------------------------------------------------------------------------------------------------------------------------------------------------------------------------------|---------------------------------------------------------------------------------------------------------------------------------------------------------------------------------------------------------------------------------|
| Wolf L, et al. (2012). Hospitals ineligible for federal meaningful use incentives have dismally low rates of adoption of EHR. <sup>4</sup> | <ul style="list-style-type: none"> <li>• Secondary data analysis, 2009 health IT supplement to the AHA survey.</li> <li>• Hospitals reported on 32 clinical functions of an EHR system and extent of implementation.</li> </ul> | <ul style="list-style-type: none"> <li>• Emerging payment methods could encourage EHR adoption.</li> <li>• “Quality Improvement Organizations” may increase adoption because they provide technical support that many LTC facilities need.</li> </ul> | <ul style="list-style-type: none"> <li>• HITECH incentives only focus on acute care and primary physicians.</li> <li>• Expanding the incentives to LTC facilities may be too costly.</li> </ul>                                 |
| Wang T, et al. (2012). Adoption and utilization of EHR systems by LTC in Texas. <sup>5</sup>                                               | <ul style="list-style-type: none"> <li>• Survey instrument mailed to all Texas LTC facilities.</li> <li>• Data were self-reported rates of adoption.</li> </ul>                                                                 | <ul style="list-style-type: none"> <li>• Anticipating state and federal requirements.</li> <li>• Good communication between vendors and LTC facilities.</li> <li>• Education and training programs.</li> </ul>                                        | <ul style="list-style-type: none"> <li>• Lack of initial investment resources.</li> <li>• No technical infrastructure.</li> <li>• Not enough time to implement the EHR.</li> <li>• Lack of space for the new system.</li> </ul> |
| Resnick H, et al. (2009). Use of Electronic Information Systems in Nursing Homes: United States. <sup>6</sup>                              | <ul style="list-style-type: none"> <li>• Secondary data analysis from the National Nursing Home Survey (NNHS).</li> <li>• The data reported a wide range in level of adoption.</li> </ul>                                       | <ul style="list-style-type: none"> <li>• Error reduction.</li> <li>• Quality.</li> <li>• Efficiency.</li> <li>• Better health outcomes.</li> </ul>                                                                                                    | <ul style="list-style-type: none"> <li>• Cost.</li> <li>• Complex systems (implementation).</li> <li>• No standards (external).</li> </ul>                                                                                      |
| Davidson J. (2009). Electronic Medical Records: what they are and how they will revolutionize the delivery of care. <sup>7</sup>           | <ul style="list-style-type: none"> <li>• Summary of articles (non-study) and concepts justifying the creation of the Canadian Health Infoway..</li> </ul>                                                                       | <ul style="list-style-type: none"> <li>• Comprehensive implementation planning.</li> <li>• Governmental initiatives.</li> <li>• Management and staff support.</li> </ul>                                                                              | <ul style="list-style-type: none"> <li>• Cost.</li> <li>• Privacy issues.</li> <li>• Incorrect vendor.</li> </ul>                                                                                                               |
| Hamid F, et al. (2013). Providers Acceptance Factors and                                                                                   | <ul style="list-style-type: none"> <li>• Survey instrument given to physicians (n=24), nurse practitioners and PAs (n= 20) in acute-care settings.</li> </ul>                                                                   | <ul style="list-style-type: none"> <li>• EHR satisfaction increases when the users understand the benefits.</li> <li>• Supportive</li> </ul>                                                                                                          | <ul style="list-style-type: none"> <li>• Cost.</li> <li>• Perceived lack of usefulness.</li> <li>• Time consuming.</li> </ul>                                                                                                   |

|                                                                                                            |                                                                                                                                                                                                                                                                             |                                                                                                                                                                                                                                      |                                                                                                                                                                                                                                                   |
|------------------------------------------------------------------------------------------------------------|-----------------------------------------------------------------------------------------------------------------------------------------------------------------------------------------------------------------------------------------------------------------------------|--------------------------------------------------------------------------------------------------------------------------------------------------------------------------------------------------------------------------------------|---------------------------------------------------------------------------------------------------------------------------------------------------------------------------------------------------------------------------------------------------|
| their Perceived Barriers to Electronic Health Record EHR Adoption. <sup>8</sup>                            |                                                                                                                                                                                                                                                                             | <p>management.</p> <ul style="list-style-type: none"> <li>• Training programs.</li> </ul>                                                                                                                                            |                                                                                                                                                                                                                                                   |
| Alexander G, et al. (2009). IT Sophistication and Quality Measures in Nursing Homes. <sup>9</sup>          | <ul style="list-style-type: none"> <li>• Survey instrument of 210 nursing homes in Missouri.</li> <li>• Two groups of measurements collected: level of IT sophistication and quality measures, as defined by the U.S. Center for Medicare and Medicaid Services.</li> </ul> | <ul style="list-style-type: none"> <li>• Improve clinical decision making.</li> <li>• Earlier intervention.</li> <li>• Time savings.</li> </ul>                                                                                      | <ul style="list-style-type: none"> <li>• IT sophistication negatively correlated with detection of incontinence (implementation issue?)</li> </ul>                                                                                                |
| Phillips K, et al. (2010). Electronic medical records in long-term care. <sup>10</sup>                     | <ul style="list-style-type: none"> <li>• Systematic literature review.</li> </ul>                                                                                                                                                                                           | <ul style="list-style-type: none"> <li>• Government financial incentives.</li> <li>• Reduced errors and adverse drug events.</li> <li>• Including users in the design and implementation process.</li> </ul>                         | <ul style="list-style-type: none"> <li>• Adoption costs.</li> <li>• Efficiency outcomes were inconsistent.</li> <li>• Incongruent cost savings.</li> <li>• Lack of interoperability.</li> <li>• Fear of changing the facility culture.</li> </ul> |
| Wilkins M. (2009). Factors influencing acceptance of electronic health records in hospitals. <sup>11</sup> | <ul style="list-style-type: none"> <li>• Survey instrument to members of the Arkansas Hospital Association.</li> <li>• LTC hospitals were cross-tabbed separately from other hospitals.</li> </ul>                                                                          | <ul style="list-style-type: none"> <li>• Training and learning the system increases adoption.</li> <li>• Understanding the usefulness of the EHR technology.</li> </ul>                                                              | <ul style="list-style-type: none"> <li>• Facility size.</li> <li>• Lack of change agents or leaders in the facility.</li> <li>• Lack of interoperability.</li> <li>• Cost.</li> <li>• Resistance to change.</li> </ul>                            |
| Filipova AA. (2013). Electronic Health Records Use and Barriers and Benefits to Use in Skilled Nursing     | <ul style="list-style-type: none"> <li>• Cross-sectional design.</li> <li>• Mail and web survey instruments.</li> </ul>                                                                                                                                                     | <ul style="list-style-type: none"> <li>• Federal and state government incentives or policy initiatives could offset financial barriers.</li> <li>• Aligning organizational strategic plans could also encourage adoption.</li> </ul> | <ul style="list-style-type: none"> <li>• Financial barriers like no capital to implement an EHR and the cost of hardware and infrastructure.</li> <li>• Organizational barriers.</li> <li>• Legal and regulatory</li> </ul>                       |

|                                                                                                                                            |                                                                                                                                                                                                                 |                                                                                                                                                                                                                                                                                                                                                                            |                                                                                                                                                                                                                                                                                            |
|--------------------------------------------------------------------------------------------------------------------------------------------|-----------------------------------------------------------------------------------------------------------------------------------------------------------------------------------------------------------------|----------------------------------------------------------------------------------------------------------------------------------------------------------------------------------------------------------------------------------------------------------------------------------------------------------------------------------------------------------------------------|--------------------------------------------------------------------------------------------------------------------------------------------------------------------------------------------------------------------------------------------------------------------------------------------|
| Facilities. <sup>12</sup>                                                                                                                  |                                                                                                                                                                                                                 |                                                                                                                                                                                                                                                                                                                                                                            | barriers. <ul style="list-style-type: none"> <li>• Technological barriers.</li> <li>• Network barriers.</li> </ul>                                                                                                                                                                         |
| Bezboruah KC, et al. (2014). Management attitudes and technology adoption in long-term care facilities. <sup>13</sup>                      | <ul style="list-style-type: none"> <li>• Exploratory, qualitative case study.</li> </ul>                                                                                                                        | <ul style="list-style-type: none"> <li>• Institutional pressure like anticipated regulations and competition pressures increase EHR adoption.</li> </ul>                                                                                                                                                                                                                   | <ul style="list-style-type: none"> <li>• Cost of the electronic system and projected upgrades.</li> <li>• Leaders perceiving staff's resistance to change.</li> <li>• Misunderstanding how EHRs could be useful or not having enough information to choose the right system.</li> </ul>    |
| Cherry B. (2011). Management attitudes and technology adoption in long-term care facilities. <sup>14</sup>                                 | <ul style="list-style-type: none"> <li>• Survey instrument to LTC facilities in Texas.</li> </ul>                                                                                                               | <ul style="list-style-type: none"> <li>• Fast-growing elder populations mean quality of care in LTC facilities must be addressed with EHRs.</li> <li>• A strong implementation plan within the facility that aligns with strategic plans.</li> <li>• Initial and follow-up training programs.</li> <li>• A perception shift about the benefits of EHR adoption.</li> </ul> | <ul style="list-style-type: none"> <li>• Cost and a lack of capital resources.</li> <li>• Lack of industry standards.</li> <li>• Complicated implementation processes.</li> <li>• Lack of technical support.</li> <li>• Not enough evidence to support EHR's proposed benefits.</li> </ul> |
| Grabenbauer L, et al. (2011). Electronic Health Record Adoption - Maybe It's not about the Money: Physician Super-Users, Electronic Health | <ul style="list-style-type: none"> <li>• Qualitative study conducted to compare two robust EHR solutions.</li> <li>• EHR- savvy users from multiple organizations interviewed through focus groups..</li> </ul> | <ul style="list-style-type: none"> <li>• Improved communication.</li> <li>• Patient data access and sharing.</li> </ul>                                                                                                                                                                                                                                                    | <ul style="list-style-type: none"> <li>• Cost.</li> <li>• Reduced time with patients.</li> <li>• Currently EHRs do not impact population health.</li> </ul>                                                                                                                                |

|                                                                                                                                             |                                                                                                                                                                                                                                       |                                                                                                                                                                                                                                                                                                                               |                                                                                                                                                                                                                                                                                                                                                                       |
|---------------------------------------------------------------------------------------------------------------------------------------------|---------------------------------------------------------------------------------------------------------------------------------------------------------------------------------------------------------------------------------------|-------------------------------------------------------------------------------------------------------------------------------------------------------------------------------------------------------------------------------------------------------------------------------------------------------------------------------|-----------------------------------------------------------------------------------------------------------------------------------------------------------------------------------------------------------------------------------------------------------------------------------------------------------------------------------------------------------------------|
| Records and Patient Care. <sup>15</sup>                                                                                                     |                                                                                                                                                                                                                                       |                                                                                                                                                                                                                                                                                                                               |                                                                                                                                                                                                                                                                                                                                                                       |
| Cherry B, et al. (2011). Experiences with electronic health records: Early adopters in long-term care facilities. <sup>20</sup>             | <ul style="list-style-type: none"> <li>• Semi-structured interviews conducted at 10 LTC sites.</li> <li>• Interviewees consisted of administrators, nurse managers, nurses, certified nurse aides, and other system users.</li> </ul> | <ul style="list-style-type: none"> <li>• Rapid patient record retrieval.</li> <li>• Better document consistency, quality, and accuracy.</li> <li>• Improvements in employee satisfaction and retention.</li> <li>• Better patient assessments, oversight, and order processing.</li> <li>• Better time management.</li> </ul> | <ul style="list-style-type: none"> <li>• Technology and maintenance problems like downtime or learning the new system.</li> <li>• Residents thought providers were more focused on the computers than on them.</li> </ul>                                                                                                                                             |
| Tabar P. (2013). Why EHRs matter to LTC's future. <sup>23</sup>                                                                             | <ul style="list-style-type: none"> <li>• Editorial.</li> </ul>                                                                                                                                                                        | <ul style="list-style-type: none"> <li>• Perceptions are changing in long-term care; EHRs are becoming a cost of doing business.</li> </ul>                                                                                                                                                                                   | <ul style="list-style-type: none"> <li>• Most EHRs were built for acute care and LTC facilities had trouble finding a system that met the organization's needs.</li> </ul>                                                                                                                                                                                            |
| Vendor group develops EHR code of conduct. (2013). <sup>24</sup>                                                                            | <ul style="list-style-type: none"> <li>• Journal bulletin board post.</li> </ul>                                                                                                                                                      | <ul style="list-style-type: none"> <li>• Cost reductions.</li> <li>• Improve patient outcomes.</li> <li>• State programs could help fund a facility's EHR adoption.</li> </ul>                                                                                                                                                |                                                                                                                                                                                                                                                                                                                                                                       |
| Yu P, et al. (2013). Unintended adverse consequences of introducing electronic health records in residential aged care homes. <sup>25</sup> | <ul style="list-style-type: none"> <li>• Qualitative semi-structured interview study of 9 residential aged care homes.</li> <li>• User perceptions evaluated.</li> </ul>                                                              | <ul style="list-style-type: none"> <li>• Continuous training.</li> <li>• Open dialogue with vendors.</li> <li>• Balancing EHR accuracy with patient care.</li> </ul>                                                                                                                                                          | <ul style="list-style-type: none"> <li>• Staff resisted the new system because personal perceptions about their age, lack of documentation skills, or other reasons created limitations.</li> <li>• Information management became too difficult and documents lacked consistency.</li> <li>• Providers complained about spending less time with residents.</li> </ul> |

|                                                                                                                                                                         |                                                                                                                                                                                                               |                                                                                                                                                                                                                                                               |                                                                                                                                                                                                                                                             |
|-------------------------------------------------------------------------------------------------------------------------------------------------------------------------|---------------------------------------------------------------------------------------------------------------------------------------------------------------------------------------------------------------|---------------------------------------------------------------------------------------------------------------------------------------------------------------------------------------------------------------------------------------------------------------|-------------------------------------------------------------------------------------------------------------------------------------------------------------------------------------------------------------------------------------------------------------|
| <p>Hamann DJ, et al. (2013). Utilization of Technology by Long-Term Care Providers Comparisons Between For-Profit and Nonprofit Institutions.<sup>26</sup></p>          | <ul style="list-style-type: none"> <li>• Secondary data analysis of multiple surveys conducted by the CDC.</li> <li>•</li> </ul>                                                                              | <ul style="list-style-type: none"> <li>• Nonprofit facilities were 40% more likely to adopt EHRs.</li> <li>• Nonprofits have more regulations, so may need the benefits of EHRs.</li> </ul>                                                                   | <ul style="list-style-type: none"> <li>• For-profit facilities lagged behind in EHR adoption rates.</li> <li>• Fewer regulations enable for-profit facilities to invest in cost-effective endeavors and avoid the expense of EHR implementation.</li> </ul> |
| <p>Vest JR, et al. (2013). Changes to the electronic health records market in light of health information technology certification and meaningful use.<sup>27</sup></p> | <ul style="list-style-type: none"> <li>• Secondary data analysis of HIMSS data.</li> <li>• Hospital referral regions were used to define local markets.</li> <li>• Analysis was changes over time.</li> </ul> | <ul style="list-style-type: none"> <li>• More EHR vendors.</li> <li>• Trends show electronic record use is on the rise.</li> <li>• Meaningful use makes EHRs more prevalent.</li> </ul>                                                                       | <ul style="list-style-type: none"> <li>• Lagging widespread EHR adoption.</li> <li>• Misaligned incentives.</li> </ul>                                                                                                                                      |
| <p>Weaver. (2005). EHR adoption in LTC and the HIM value.<sup>28</sup></p>                                                                                              | <ul style="list-style-type: none"> <li>• Practice brief (a regular section in the journal).</li> <li>• A publication of practice guidelines for managing health information.</li> </ul>                       | <ul style="list-style-type: none"> <li>• Error reduction (quality).</li> <li>• Improved efficiency.</li> <li>• Consumer (user) perceptions</li> <li>• Improved health outcomes</li> </ul>                                                                     | <ul style="list-style-type: none"> <li>• Difficulties transitioning from paper to EHR. (Implementation .)</li> <li>• Training becomes paramount.</li> </ul>                                                                                                 |
| <p>Gruber N, et al. (2010). Embracing change to improve performance: implementation of an electronic health record system.<sup>29</sup></p>                             | <ul style="list-style-type: none"> <li>• Case study of an implementation of an EHR in a facility.</li> <li>• Includes cost, staffing, and experience over 2 years.</li> </ul>                                 | <ul style="list-style-type: none"> <li>• Strong implementation team.</li> <li>• Communicate often and thoroughly.</li> <li>• Set goals, tasks, and schedules for the implementation.</li> <li>• Reduced errors.</li> <li>• Improved documentation.</li> </ul> | <ul style="list-style-type: none"> <li>• Minor increases in operating expenses.</li> <li>• Training.</li> </ul>                                                                                                                                             |
| <p>Holup AA, et al. (2014).</p>                                                                                                                                         | <ul style="list-style-type: none"> <li>• Pilot study examining</li> </ul>                                                                                                                                     | <ul style="list-style-type: none"> <li>• Rapidly aging populations stresses the</li> </ul>                                                                                                                                                                    | <ul style="list-style-type: none"> <li>• Long-term care EHRs are not as</li> </ul>                                                                                                                                                                          |

|                                                                                                                                                            |                                                                                                                                                                |                                                                                                                                                                                                                                                                                                      |                                                                                                                                                                                                                                                                                    |
|------------------------------------------------------------------------------------------------------------------------------------------------------------|----------------------------------------------------------------------------------------------------------------------------------------------------------------|------------------------------------------------------------------------------------------------------------------------------------------------------------------------------------------------------------------------------------------------------------------------------------------------------|------------------------------------------------------------------------------------------------------------------------------------------------------------------------------------------------------------------------------------------------------------------------------------|
| <p>Going Digital Adoption of Electronic Health Records in Assisted Living Facilities.<sup>30</sup></p>                                                     | <p>associations between structural characteristics and adoption and use of EHR as a process characteristic in assisted living.</p>                             | <p>need to create interoperable, coordinated EHRs for LTC facilities.</p>                                                                                                                                                                                                                            | <p>comprehensive as acute care EHRs.</p>                                                                                                                                                                                                                                           |
| <p>Holup AA, et al. (2013). Facility characteristics associated with the use of electronic health records in residential care facilities.<sup>31</sup></p> | <ul style="list-style-type: none"> <li>• Secondary data analysis of annual survey instrument of the National Survey of Residential Care Facilities.</li> </ul> | <ul style="list-style-type: none"> <li>• Created better health outcomes.</li> <li>• Reduced extra costs.</li> <li>• Improved delivery and quality.</li> <li>• An increasing elder population makes implementing EHRs a necessity.</li> <li>• Nonprofits were more likely to utilize EHRs.</li> </ul> | <ul style="list-style-type: none"> <li>• High initial investment means slower adoption in facilities that cannot afford the EHR system, which slows the rate of becoming better integrated with acute care.</li> <li>• Facility characteristics determine EHR adoption.</li> </ul> |
